# Supplementary material for: Cellular and molecular effects of non-ionizing electromagnetic fields
Source: publisher site journal article supplement (doi:10.1515/reveh-2023-0023), 2023-04-06
Supplement: Supplementary file 1 [file j_reveh-2023-0023_suppl_001.docx]

**Supplement 1: EMF-induced oxidative molecular damages**

| **Proteins** |  |
| --- | --- |
| Static/ELF EMF | Akdag et al. (2013); Benassi et al. (2016); Bhardwaj et al. (2016); Calabrò et al. (2013);  [Eleuteri](https://pubmed.ncbi.nlm.nih.gov/?sort=date&term=Eleuteri+AM&cauthor_id=19672456) et al. (2009); Erdal et al. (2008); Kthiri et al. (2019); Seif et al. (2019) |
| RFR | [Asl,](https://www.ncbi.nlm.nih.gov/pubmed/?term=Asl%20JF%5BAuthor%5D&cauthor=true&cauthor_uid=32128712)  [Goudarzi](https://www.ncbi.nlm.nih.gov/pubmed/?term=Goudarzi%20M%5BAuthor%5D&cauthor=true&cauthor_uid=32128712), and [Shoghi](https://www.ncbi.nlm.nih.gov/pubmed/?term=Shoghi%20H%5BAuthor%5D&cauthor=true&cauthor_uid=32128712) (2020); Avci et al. (2012); Bektas, Dasdag, and Bektas (2020); Bilgici et al. (2013); Borzoueisileh et al. (2020); Deshmukh et al. (2013); Djordjevic et al. (2015); Furtado-Filho et al. (2015); Gürler et al. (2014); Jeong et al. (2018); Kim and Rhee (2004); Lian et al. (2018); Marjanovic Cermak et al. (2018); Meena et al. (2014); Motawi et al. (2014); Tkalec et al. (2013) |
|  |  |
| **DNA** |  |
| Static/ELF EMF | Ahuja et al. (1999); [Al-Huqail and](http://www.ncbi.nlm.nih.gov/pubmed/?term=Al-Huqail%20AA%5BAuthor%5D&cauthor=true&cauthor_uid=26180815) [Abdelhaliem (2015);](http://www.ncbi.nlm.nih.gov/pubmed/?term=Abdelhaliem%20E%5BAuthor%5D&cauthor=true&cauthor_uid=26180815) Buldak et al. (2012); Duan et al. (2015); Giorgi et al. (2017); Ivancsits et al. (2003a,b); Jajte et al. (2001); [Jouni,](http://www.ncbi.nlm.nih.gov/pubmed?term=Jouni%20FJ%5BAuthor%5D&cauthor=true&cauthor_uid=22108253) [Abdolmaleki,](http://www.ncbi.nlm.nih.gov/pubmed?term=Abdolmaleki%20P%5BAuthor%5D&cauthor=true&cauthor_uid=22108253) and [Ghanati](http://www.ncbi.nlm.nih.gov/pubmed?term=Ghanati%20F%5BAuthor%5D&cauthor=true&cauthor_uid=22108253), (2012); Kim et al. (2010, 2012); Kubinyi et al. (2010); Lai and Singh (1997; 2004); Lourencini da Silva et al. (2000); Luo et al. (2006); Mariucci et al. (2010); Nikolova et al. (2005); Pandir and Sahingoz (2014); [Rageh,](http://www.ncbi.nlm.nih.gov/pubmed?term=Rageh%20MM%5BAuthor%5D&cauthor=true&cauthor_uid=23091355) [El-Gebaly](http://www.ncbi.nlm.nih.gov/pubmed?term=El-Gebaly%20RH%5BAuthor%5D&cauthor=true&cauthor_uid=23091355), and [El-Bialy](http://www.ncbi.nlm.nih.gov/pubmed?term=El-Bialy%20NS%5BAuthor%5D&cauthor=true&cauthor_uid=23091355), (2012); Regoli et al. (2005); Schmitz et al. (2004); Singh and Lai (1998); Solek et al. (2017); Storch et al. (2016); Sun et al. (2012); Svedenstal, Johanson, and Mild, (1999); Tiwari et al. (2015); Villarini et al. (2013); Wolf et al. (2005); Yaguchi et al. (1999); Yin et al. (2016); Yokus et al. (2005; 2008); Yoon et al.(2014); Yuan et al. (2020); Zendehdel et al. (2019); Zhang et al. (2016); Zmyślony et al. (2004) |
| RFR | Alkis et al. (2019a,b); Atasoy et al. (2013); Bektas, Dasdag, and Bektas (2020); Burlaka et al. (2013); De Iuliis et al. (2009); Duan et al. (2015); Gajski et al. (2009); Gulati et al. (2020); Güler et al. (2010; 2012); Gürler et al. (2014); Hanci et al. (2013); Houston et al. (2018; 2019); Jeong et al. (2018); Kumar et al. (2014); Lai and Singh (1997); Li et al. (2018); Liu et al. (2013a,b); Luukkonen et al. (2009); Meena et al. (2014); Pandey et al. (2017; 2018); Şahin et al. (2016); Shahin S. et al. (2013); Shahin N.N. et al. (2019); Sharma and Shukla (2020); [Sharma](https://pubmed.ncbi.nlm.nih.gov/?sort=pubdate&term=Sharma+A&cauthor_id=33109858), [Shrivastava](https://pubmed.ncbi.nlm.nih.gov/?sort=pubdate&term=Shrivastava+S&cauthor_id=33109858), and [Shukla](https://pubmed.ncbi.nlm.nih.gov/?sort=pubdate&term=Shukla+S&cauthor_id=33109858) (2020); Sokolovic et al. (2015); Sun et al. (2017); Tkalec et al. (2013); [Tomruk,](http://www.ncbi.nlm.nih.gov/pubmed?term=%22Tomruk%20A%22%5BAuthor%5D) [Guler](http://www.ncbi.nlm.nih.gov/pubmed?term=%22Guler%20G%22%5BAuthor%5D), and [Dincel](http://www.ncbi.nlm.nih.gov/pubmed?term=%22Dincel%20AS%22%5BAuthor%5D) (2010); Vilić et al. (2017); Wang et al. (2015); Wu et al. (2008); Xu et al. (2010); Yakymenko et al. (2018); Yao et al. (2008); [Zothansiama](https://www.ncbi.nlm.nih.gov/pubmed/?term=Zothansiama%5BAuthor%5D&cauthor=true&cauthor_uid=28777669) et al. (2017) |
|  |  |
| **Lipids** |  |
| Static/ELF EMF | Akdag et al. (2013); Akpinar et al. (2012; 2016); Aksen et al. (2006); Bediz et al. (2006); Buczyński et al. (2005); Chu et al. (2011); Ciejka et al. (2011); Coşkun et al. (2009): da Costa et al. (2021); Emre et al. (2011); Gok et al. (2016): [Guleken](https://pubmed.ncbi.nlm.nih.gov/?sort=date&term=Guleken+Z&cauthor_id=35189391) et al. (2022); Guler et al. (2008); Hashish et al. (2008); Hosseinabadi et al. (2021); Jajte et al. (2002); Jelenković et al. (2006); [Jouni,](http://www.ncbi.nlm.nih.gov/pubmed?term=Jouni%20FJ%5BAuthor%5D&cauthor=true&cauthor_uid=22108253) [Abdolmaleki,](http://www.ncbi.nlm.nih.gov/pubmed?term=Abdolmaleki%20P%5BAuthor%5D&cauthor=true&cauthor_uid=22108253) and [Ghanati](http://www.ncbi.nlm.nih.gov/pubmed?term=Ghanati%20F%5BAuthor%5D&cauthor=true&cauthor_uid=22108253), (2012); Kantar Gok et al. (2014); Luukkonen et al. (2014); Maliszewska et al. (2018); Martínez-Sámano et al. (2018); Pandir and Sahingoz (2014); Politański et al. (2010); Regoli et al. (2005); [Sahebjamei,](http://www.ncbi.nlm.nih.gov/pubmed?term=Sahebjamei%20H%5BAuthor%5D&cauthor=true&cauthor_uid=16988990) [Abdolmaleki](http://www.ncbi.nlm.nih.gov/pubmed?term=Abdolmaleki%20P%5BAuthor%5D&cauthor=true&cauthor_uid=16988990), and [Ghanati](http://www.ncbi.nlm.nih.gov/pubmed?term=Ghanati%20F%5BAuthor%5D&cauthor=true&cauthor_uid=16988990), (2007); Seifirad et al. (2014); Selaković et al. (2013); [Shabani](https://pubmed.ncbi.nlm.nih.gov/?sort=pubdate&term=Shabani+Z&cauthor_id=33794719) et al. (2021); Tayefi et al. (2010); Vafaei et al. (2020); Vergallo et al. (2020); Yokus et al. (2005); Zwirska-Korczalaet et al. (2004) |
| RFR | Alkis et al. (2019); [Aweda,](http://www.ncbi.nlm.nih.gov/pubmed?term=%22Aweda%20MA%22%5BAuthor%5D) [Gbenebitse](http://www.ncbi.nlm.nih.gov/pubmed?term=%22Gbenebitse%20S%22%5BAuthor%5D), and [Meidinyo](http://www.ncbi.nlm.nih.gov/pubmed?term=%22Meidinyo%20RO%22%5BAuthor%5D) (2003); Ayata et al. (2004); Aydin and Akar (2011); Aynali et al. (2013); Bilgici et al. (2013); Bodera et al. (2015); Chauhan et al. (2017); Chen et al. (2011); Deshmukh et al. (2013); Djordjevic et al. (2015); [Esmekaya,](http://www.ncbi.nlm.nih.gov/pubmed?term=%22Esmekaya%20MA%22%5BAuthor%5D)  [Ozer](http://www.ncbi.nlm.nih.gov/pubmed?term=%22Ozer%20C%22%5BAuthor%5D), and [Seyhan](http://www.ncbi.nlm.nih.gov/pubmed?term=%22Seyhan%20N%22%5BAuthor%5D) (2011);  Esmekaya et al. (2016); Gulati et al. (2018); Güler et al. (2010, 2012); Guney et al. (2007); Hanci et al. (2013); Hernández-Morales et al. (2020); Kim et al. (2004); Koylu et al. (2006); Kumar et al. (2014); Maaroufi et al. (2011); Mailankot et al. (2009); Marjanovic Cermak et al. (2017, 2018); Masoumi et al. (2018); Moustafa et al. (2001); Nazıroğlu et al. (2012); Nirwane, Sridhar, and Majumdar (2016); Oksay et al. (2014); Oktem et al. (2005); Oral et al. (2006); Ozguner et al. (2005a,b); [Ozguner,](http://www.ncbi.nlm.nih.gov/entrez/query.fcgi?db=pubmed&cmd=Search&term=%22Ozguner+F%22%5BAuthor%5D) [Bardak](http://www.ncbi.nlm.nih.gov/entrez/query.fcgi?db=pubmed&cmd=Search&term=%22Bardak+Y%22%5BAuthor%5D), and [Comlekci](http://www.ncbi.nlm.nih.gov/entrez/query.fcgi?db=pubmed&cmd=Search&term=%22Comlekci+S%22%5BAuthor%5D) (2006); Ozorak et al. (2013); Özsobacı et al. (2020); Pastacı Özsobacı et al. (2018); [Saikhedkar et](http://www.ncbi.nlm.nih.gov/pubmed?term=Saikhedkar%20N%5BAuthor%5D&cauthor=true&cauthor_uid=24861496) al. (2014); [Shahin S.,](https://www.ncbi.nlm.nih.gov/pubmed/?term=Shahin%20S%5BAuthor%5D&cauthor=true&cauthor_uid=28780396) [Singh](https://www.ncbi.nlm.nih.gov/pubmed/?term=Singh%20SP%5BAuthor%5D&cauthor=true&cauthor_uid=28780396), and [Chaturvedi](https://www.ncbi.nlm.nih.gov/pubmed/?term=Chaturvedi%20CM%5BAuthor%5D&cauthor=true&cauthor_uid=28780396). (2017); Shahin N.N. et al. (2019); [Sharma](https://pubmed.ncbi.nlm.nih.gov/?sort=pubdate&term=Sharma+A&cauthor_id=34404322), [Shrivastava](https://pubmed.ncbi.nlm.nih.gov/?sort=pubdate&term=Shrivastava+S&cauthor_id=34404322), and [Shukla](https://pubmed.ncbi.nlm.nih.gov/?sort=pubdate&term=Shukla+S&cauthor_id=34404322), (2021); Singh et al. (2012); [Tkalec,](http://www.ncbi.nlm.nih.gov/pubmed?term=%22Tkalec%20M%22%5BAuthor%5D) [Malarić](http://www.ncbi.nlm.nih.gov/pubmed?term=%22Malari%C4%87%20K%22%5BAuthor%5D), and [Pevalek-Kozlina](http://www.ncbi.nlm.nih.gov/pubmed?term=%22Pevalek-Kozlina%20B%22%5BAuthor%5D) (2007); Tkalec et al. (2013); Tök et al. (2014); Türker et al. (2011); Varghese et al. (2018); [Yüksel,](http://www.ncbi.nlm.nih.gov/pubmed/?term=Y%C3%BCksel%20M%5BAuthor%5D&cauthor=true&cauthor_uid=26578367) [Nazıroğlu, and](http://www.ncbi.nlm.nih.gov/pubmed/?term=Naz%C4%B1ro%C4%9Flu%20M%5BAuthor%5D&cauthor=true&cauthor_uid=26578367) [Özkaya](http://www.ncbi.nlm.nih.gov/pubmed/?term=%C3%96zkaya%20MO%5BAuthor%5D&cauthor=true&cauthor_uid=26578367) (2016); [Zosangzuali](https://pubmed.ncbi.nlm.nih.gov/?sort=pubdate&term=Zosangzuali+M&cauthor_id=33687298)et al. (2021); [Zothansiama](https://www.ncbi.nlm.nih.gov/pubmed/?term=Zothansiama%5BAuthor%5D&cauthor=true&cauthor_uid=28777669) et al. (2017) |

**References**

Ahuja, Y.R., B. Vijayashree, R. Saran, E.L. Jayashri, J.K. Manoranjani, and S.C. Bhargava. 1999. In vitro effects of low-level, low-frequency electromagnetic fields on DNA damage in

human leucocytes by comet assay. *Indian J. Biochem. Biophys* 36:318-22.

[Akdag, M.Z](http://www.ncbi.nlm.nih.gov/pubmed?term=Akdag%20MZ%5BAuthor%5D&cauthor=true&cauthor_uid=23324065)., S. [Dasdag, D.U.](http://www.ncbi.nlm.nih.gov/pubmed?term=Dasdag%20S%5BAuthor%5D&cauthor=true&cauthor_uid=23324065) [Cakir,](http://www.ncbi.nlm.nih.gov/pubmed?term=Cakir%20DU%5BAuthor%5D&cauthor=true&cauthor_uid=23324065)  B. [Yokus](http://www.ncbi.nlm.nih.gov/pubmed?term=Yokus%20B%5BAuthor%5D&cauthor=true&cauthor_uid=23324065), G. [Kizil](http://www.ncbi.nlm.nih.gov/pubmed?term=Kizil%20G%5BAuthor%5D&cauthor=true&cauthor_uid=23324065), and M. [Kizil](http://www.ncbi.nlm.nih.gov/pubmed?term=Kizil%20M%5BAuthor%5D&cauthor=true&cauthor_uid=23324065). 2013. Do 100- and 500-μT ELF magnetic fields alter beta-amyloid protein, protein carbonyl and malondialdehyde in rat brains? [*Electromagn. Biol. Med*](http://www.ncbi.nlm.nih.gov/pubmed/23324065) 32:363-72.

[Akpinar, D](http://www.ncbi.nlm.nih.gov/pubmed?term=Akpinar%20D%5BAuthor%5D&cauthor=true&cauthor_uid=23045992)., N. [Ozturk](http://www.ncbi.nlm.nih.gov/pubmed?term=Ozturk%20N%5BAuthor%5D&cauthor=true&cauthor_uid=23045992), S. [Ozen](http://www.ncbi.nlm.nih.gov/pubmed?term=Ozen%20S%5BAuthor%5D&cauthor=true&cauthor_uid=23045992), A. [Agar](http://www.ncbi.nlm.nih.gov/pubmed?term=Agar%20A%5BAuthor%5D&cauthor=true&cauthor_uid=23045992), and P. [Yargicoglu](http://www.ncbi.nlm.nih.gov/pubmed?term=Yargicoglu%20P%5BAuthor%5D&cauthor=true&cauthor_uid=23045992). 2012. The effect of different strengths of extremely low-frequency electric fields on antioxidant status, lipid peroxidation, and visual evoked potentials. [*Electromagn. Biol. Med*](http://www.ncbi.nlm.nih.gov/pubmed/23045992) 31:436-48.

[Akpınar, D](http://www.ncbi.nlm.nih.gov/pubmed/?term=Akp%C4%B1nar%20D%5BAuthor%5D&cauthor=true&cauthor_uid=27070942)., D.K. [Gok](http://www.ncbi.nlm.nih.gov/pubmed/?term=Kantar%20Gok%20D%5BAuthor%5D&cauthor=true&cauthor_uid=27070942), E. [Hidisoglu](http://www.ncbi.nlm.nih.gov/pubmed/?term=Hidisoglu%20E%5BAuthor%5D&cauthor=true&cauthor_uid=27070942), M. [Aslan](http://www.ncbi.nlm.nih.gov/pubmed/?term=Aslan%20M%5BAuthor%5D&cauthor=true&cauthor_uid=27070942), S. [Ozen](http://www.ncbi.nlm.nih.gov/pubmed/?term=Ozen%20S%5BAuthor%5D&cauthor=true&cauthor_uid=27070942), A. [Agar](http://www.ncbi.nlm.nih.gov/pubmed/?term=Agar%20A%5BAuthor%5D&cauthor=true&cauthor_uid=27070942), P. [Yargicoglu](http://www.ncbi.nlm.nih.gov/pubmed/?term=Yargicoglu%20P%5BAuthor%5D&cauthor=true&cauthor_uid=27070942). 2016. Effects of pre- and postnatal exposure to extremely low-frequency electric fields on mismatch negativity component of the auditory event-related potentials: Relation to oxidative stress. [*Electromagn. Biol. Med*](http://www.ncbi.nlm.nih.gov/pubmed/27070942) 35:245-59.

[Aksen, F](http://www.ncbi.nlm.nih.gov/pubmed?term=%22Aksen%20F%22%5BAuthor%5D)., M.Z. [Akdag](http://www.ncbi.nlm.nih.gov/pubmed?term=%22Akdag%20MZ%22%5BAuthor%5D), A. [Ketani](http://www.ncbi.nlm.nih.gov/pubmed?term=%22Ketani%20A%22%5BAuthor%5D), B. [Yokus](http://www.ncbi.nlm.nih.gov/pubmed?term=%22Yokus%20B%22%5BAuthor%5D), A. [Kaya](http://www.ncbi.nlm.nih.gov/pubmed?term=%22Kaya%20A%22%5BAuthor%5D), and S. [Dasdag](http://www.ncbi.nlm.nih.gov/pubmed?term=%22Dasdag%20S%22%5BAuthor%5D). 2006. Effect of 50-Hz 1-mT magnetic field on the uterus and ovaries of rats (electron microscopy evaluation). [*Med. Sci. Monit*](javascript:AL_get(this,%20'jour',%20'Med%20Sci%20%0d%0aMonit.');) 12:BR215-20.

[Al-Huqail, A.A](http://www.ncbi.nlm.nih.gov/pubmed/?term=Al-Huqail%20AA%5BAuthor%5D&cauthor=true&cauthor_uid=26180815)., and E. [Abdelhaliem](http://www.ncbi.nlm.nih.gov/pubmed/?term=Abdelhaliem%20E%5BAuthor%5D&cauthor=true&cauthor_uid=26180815). 2015. Evaluation of genetic variations in maize seedlings Exposed to electric field based on protein and DNA markers. [*Biomed. Res. Int*](http://www.ncbi.nlm.nih.gov/pubmed/26180815) 2015:874906.

[Alkis, M.E](https://www.ncbi.nlm.nih.gov/pubmed/?term=Alkis%20ME%5BAuthor%5D&cauthor=true&cauthor_uid=30669883)., H.M. [Bilgin](https://www.ncbi.nlm.nih.gov/pubmed/?term=Bilgin%20HM%5BAuthor%5D&cauthor=true&cauthor_uid=30669883), V. [Akpolat](https://www.ncbi.nlm.nih.gov/pubmed/?term=Akpolat%20V%5BAuthor%5D&cauthor=true&cauthor_uid=30669883), S. [Dasdag](https://www.ncbi.nlm.nih.gov/pubmed/?term=Dasdag%20S%5BAuthor%5D&cauthor=true&cauthor_uid=30669883), K. [Yegin](https://www.ncbi.nlm.nih.gov/pubmed/?term=Yegin%20K%5BAuthor%5D&cauthor=true&cauthor_uid=30669883), M.C. [Yavas, and M.Z.](https://www.ncbi.nlm.nih.gov/pubmed/?term=Yavas%20MC%5BAuthor%5D&cauthor=true&cauthor_uid=30669883) [Akdag.](https://www.ncbi.nlm.nih.gov/pubmed/?term=Akdag%20MZ%5BAuthor%5D&cauthor=true&cauthor_uid=30669883) 2019a. Effect of 900-, 1800-, and 2100-MHz radiofrequency radiation on DNA and oxidative stress in brain. [*Electromagn. Biol. Med*](https://www.ncbi.nlm.nih.gov/pubmed/30669883) 38:32-47.

Alkis, M.S., M.Z. Akdag, S. Dasdag, K. Yegin, and V. Akpolat. 2019b. Single-strand DNA breaks and oxidative changes in rat testes exposed to radiofrequency radiation emitted from cellular phones. *Biotech. Biotech. Equip*. 33:1733-40.

[Asl, J.F](https://www.ncbi.nlm.nih.gov/pubmed/?term=Asl%20JF%5BAuthor%5D&cauthor=true&cauthor_uid=32128712)., M. [Goudarzi](https://www.ncbi.nlm.nih.gov/pubmed/?term=Goudarzi%20M%5BAuthor%5D&cauthor=true&cauthor_uid=32128712), and H. [Shoghi](https://www.ncbi.nlm.nih.gov/pubmed/?term=Shoghi%20H%5BAuthor%5D&cauthor=true&cauthor_uid=32128712). 2020. The radio-protective effect of rosmarinic acid against mobile phone and Wi-Fi radiation-induced oxidative stress in the brains of rats. [*Pharmacol. Rep*](https://www.ncbi.nlm.nih.gov/pubmed/32128712) 72:857-66.

Atasoy, H.I., M.Y. Gunal, P. Atasoy, S. Elgun, and G. Bugdayci. 2013. Immunohistopathologic demonstration of deleterious effects on growing rat testes of radiofrequency waves emitted from conventional Wi-Fi devices. *J. Pediatr. Urol* 9: 223-9.

[Avci, B](http://www.ncbi.nlm.nih.gov/pubmed?term=Avci%20B%5BAuthor%5D&cauthor=true&cauthor_uid=22788526)., A. [Akar](http://www.ncbi.nlm.nih.gov/pubmed?term=Akar%20A%5BAuthor%5D&cauthor=true&cauthor_uid=22788526), B. [Bilgici](http://www.ncbi.nlm.nih.gov/pubmed?term=Bilgici%20B%5BAuthor%5D&cauthor=true&cauthor_uid=22788526), and Ö.K. [Tunçel](http://www.ncbi.nlm.nih.gov/pubmed?term=Tun%C3%A7el%20%C3%96K%5BAuthor%5D&cauthor=true&cauthor_uid=22788526). 2012. Oxidative stress induced by 1.8 GHz radio frequency electromagnetic radiation and effects of garlic extract in rats. [*Int. J. Radiat. Biol*](http://www.ncbi.nlm.nih.gov/pubmed/22788526) 88:799-805.

[Aweda, M.A](http://www.ncbi.nlm.nih.gov/pubmed?term=%22Aweda%20MA%22%5BAuthor%5D)., S. [Gbenebitse](http://www.ncbi.nlm.nih.gov/pubmed?term=%22Gbenebitse%20S%22%5BAuthor%5D), and R.O. [Meidinyo](http://www.ncbi.nlm.nih.gov/pubmed?term=%22Meidinyo%20RO%22%5BAuthor%5D). 2003. Effects of 2.45 GHz microwave exposures on the peroxidation status in Wistar rats. [*Niger Postgrad. Med. J*](http://www.ncbi.nlm.nih.gov/pubmed?term=aweda%202003##) 10:243-6.

Ayata, A., H. Mollaoglu, H.R. Yilmaz, O. Akturk, F. Ozguner, and I. Altuntas. 2004. Oxidative stress-mediated skin damage in an experimental mobile phone model can be prevented by melatonin. *J. Dermatol* 31:878-83.

[Aydin, B](http://www.ncbi.nlm.nih.gov/pubmed?term=%22Aydin%20B%22%5BAuthor%5D)., and A. [Akar](http://www.ncbi.nlm.nih.gov/pubmed?term=%22Akar%20A%22%5BAuthor%5D). 2011. Effects of a 900-MHz electromagnetic field on oxidative stress parameters in rat lymphoid organs, polymorphonuclear leukocytes and plasma. [*Arch. Med. Res*](http://www.ncbi.nlm.nih.gov/pubmed/21820603##) 42:261-7.

Aynali, G., M. Nazıroğlu, O. Celik, M. Doğan, M. Yarıktaş, and H. Yasan. 2013. Modulation of wireless (2.45 GHz)-induced oxidative toxicity in laryngotracheal mucosa of rat by melatonin. *Eur. Arch. Otorhinolaryngol* 270:1695-700.

[Bediz, C.S](http://www.ncbi.nlm.nih.gov/pubmed?term=%22Bediz%20CS%22%5BAuthor%5D)., A.K. [Baltaci](http://www.ncbi.nlm.nih.gov/pubmed?term=%22Baltaci%20AK%22%5BAuthor%5D), R. [Mogulkoc](http://www.ncbi.nlm.nih.gov/pubmed?term=%22Mogulkoc%20R%22%5BAuthor%5D), and E. [Oztekin](http://www.ncbi.nlm.nih.gov/pubmed?term=%22Oztekin%20E%22%5BAuthor%5D). 2006. Zinc supplementation ameliorates electromagnetic field-induced lipid peroxidation in the rat brain. [*Tohoku J. Exp. Med*](javascript:AL_get(this,%20'jour',%20'Tohoku%20J%20%0d%0aExp%20Med.');)*.* 208:133-40.

Bektas, H., S. Dasdag, and M. S, Bektas. 2020. Comparison of effects of 2.4 GHz Wi-Fi and mobile phone exposure on human placenta and cord blood. *Biotechn. Biotechn. Equip.* 34:154-62.

[Benassi, B](http://www.ncbi.nlm.nih.gov/pubmed/?term=Benassi%20B%5BAuthor%5D&cauthor=true&cauthor_uid=26223801)., G. [Filomeni](http://www.ncbi.nlm.nih.gov/pubmed/?term=Filomeni%20G%5BAuthor%5D&cauthor=true&cauthor_uid=26223801), C. [Montagna, C](http://www.ncbi.nlm.nih.gov/pubmed/?term=Montagna%20C%5BAuthor%5D&cauthor=true&cauthor_uid=26223801). [Merla](http://www.ncbi.nlm.nih.gov/pubmed/?term=Merla%20C%5BAuthor%5D&cauthor=true&cauthor_uid=26223801), V. [Lopresto](http://www.ncbi.nlm.nih.gov/pubmed/?term=Lopresto%20V%5BAuthor%5D&cauthor=true&cauthor_uid=26223801), R. [Pinto](http://www.ncbi.nlm.nih.gov/pubmed/?term=Pinto%20R%5BAuthor%5D&cauthor=true&cauthor_uid=26223801), C. [Marino, and C](http://www.ncbi.nlm.nih.gov/pubmed/?term=Marino%20C%5BAuthor%5D&cauthor=true&cauthor_uid=26223801). [Consales. 2016.](http://www.ncbi.nlm.nih.gov/pubmed/?term=Consales%20C%5BAuthor%5D&cauthor=true&cauthor_uid=26223801) Extremely low frequency magnetic field (ELF-MF) exposure sensitizes SH-SY5Y cells to the pro-Parkinson's disease toxin MPP. [*Mol. Neurobiol*](http://www.ncbi.nlm.nih.gov/pubmed/26223801)*.* 53:4247-60.

[Bhardwaj, J](https://www.ncbi.nlm.nih.gov/pubmed/?term=Bhardwaj%20J%5BAuthor%5D&cauthor=true&cauthor_uid=28035152)., A. [Anand](https://www.ncbi.nlm.nih.gov/pubmed/?term=Anand%20A%5BAuthor%5D&cauthor=true&cauthor_uid=28035152), V.K. [Pandita](https://www.ncbi.nlm.nih.gov/pubmed/?term=Pandita%20VK%5BAuthor%5D&cauthor=true&cauthor_uid=28035152), and S. [Nagarajan](https://www.ncbi.nlm.nih.gov/pubmed/?term=Nagarajan%20S%5BAuthor%5D&cauthor=true&cauthor_uid=28035152). 2016. Pulsed magnetic field improves seed quality of aged green pea seeds by homeostasis of free radical content. [*J. Food Sci. Technol*](https://www.ncbi.nlm.nih.gov/pubmed/28035152)*.* 53:3969-77.

[Bilgici, B](http://www.ncbi.nlm.nih.gov/pubmed?term=Bilgici%20B%5BAuthor%5D&cauthor=true&cauthor_uid=23301880)., A. [Akar](http://www.ncbi.nlm.nih.gov/pubmed?term=Akar%20A%5BAuthor%5D&cauthor=true&cauthor_uid=23301880), B. [Avci](http://www.ncbi.nlm.nih.gov/pubmed?term=Avci%20B%5BAuthor%5D&cauthor=true&cauthor_uid=23301880), and O.K. [Tuncel](http://www.ncbi.nlm.nih.gov/pubmed?term=Tuncel%20OK%5BAuthor%5D&cauthor=true&cauthor_uid=23301880). 2013. Effect of 900 MHz radıofrequency radıatıon on oxıdatıve stress in rat brain and serum. [*Electromagn. Biol. Med*](http://www.ncbi.nlm.nih.gov/pubmed/23301880) 32:20-9.

Bodera P, W. Stankiewicz, B. Antkowiak, M. Paluch, J. Kieliszek, J. Sobiech, and M. Niemcewicz. 2015. Influence of electromagnetic field (1800 MHz) on lipid peroxidation in brain, blood, liver and kidney in rats. *Int. J. Occup. Med. Environ. Health*. 28:751-9.

[Borzoueisileh](https://pubmed.ncbi.nlm.nih.gov/?sort=pubdate&term=Borzoueisileh+S&cauthor_id=32874440) S, A. [Shabestani-Monfared](https://pubmed.ncbi.nlm.nih.gov/?sort=pubdate&term=Shabestani+Monfared+A&cauthor_id=32874440),  [H. Ghorbani](https://pubmed.ncbi.nlm.nih.gov/?sort=pubdate&term=Ghorbani+H&cauthor_id=32874440),  [S.M.J. Mortazavi](https://pubmed.ncbi.nlm.nih.gov/?sort=pubdate&term=Mortazavi+SMJ&cauthor_id=32874440), E. [Zabihi](https://pubmed.ncbi.nlm.nih.gov/?sort=pubdate&term=Zabihi+E&cauthor_id=32874440),  [M. Pouramir](https://pubmed.ncbi.nlm.nih.gov/?sort=pubdate&term=Pouramir+M&cauthor_id=32874440),  [A.H. Doustimotlagh](https://pubmed.ncbi.nlm.nih.gov/?sort=pubdate&term=Doustimotlagh+AH&cauthor_id=32874440), M. [Shafie](https://pubmed.ncbi.nlm.nih.gov/?sort=pubdate&term=Shafiee+M&cauthor_id=32874440), and F. [Niksirat](https://pubmed.ncbi.nlm.nih.gov/?sort=pubdate&term=Niksirat+F&cauthor_id=32874440). 2020. Assessment of function, histopathological changes, and oxidative stress in liver tissue due to ionizing and non-ionizing radiations. *Caspian J. Intern. Med* 11:315-23.

[Buczyński, A](http://www.ncbi.nlm.nih.gov/pubmed?term=%22Buczy%C5%84ski%20A%22%5BAuthor%5D)., K. [Pacholski](http://www.ncbi.nlm.nih.gov/pubmed?term=%22Pacholski%20K%22%5BAuthor%5D), M. [Dziedziczak-Buczyńska](http://www.ncbi.nlm.nih.gov/pubmed?term=%22Dziedziczak-Buczy%C5%84ska%20M%22%5BAuthor%5D), G. [Henrykowska](http://www.ncbi.nlm.nih.gov/pubmed?term=%22Henrykowska%20G%22%5BAuthor%5D), and A. [Jerominko](http://www.ncbi.nlm.nih.gov/pubmed?term=%22Jerominko%20A%22%5BAuthor%5D). 2005.The assessment of oxygen metabolism selected parameters of blood platelets exposed to low frequency magnetic radiation in cars--in vitro studies. [*Rocz. Akad. Med.Bialymst*](javascript:AL_get(this,%20'jour',%20'Rocz%20Akad%20%0d%0aMed%20Bialymst.');) 50 (Suppl 1):23-5.

Burlaka, A., O. Tsybulin, E. Sidorik, S. Lukin, V. Polishuk, S. Tsehmistrenko, and I. Yakymenko. 2013. Overproduction of free radical species in embryonal cells exposed to low intensity radiofrequency radiation. *Exp. Oncol* 35:219-25.

[Bułdak, R.J](http://www.ncbi.nlm.nih.gov/pubmed?term=Bu%C5%82dak%20RJ%5BAuthor%5D&cauthor=true&cauthor_uid=22535669)., R. [Polaniak](http://www.ncbi.nlm.nih.gov/pubmed?term=Polaniak%20R%5BAuthor%5D&cauthor=true&cauthor_uid=22535669), L. [Bułdak](http://www.ncbi.nlm.nih.gov/pubmed?term=Bu%C5%82dak%20L%5BAuthor%5D&cauthor=true&cauthor_uid=22535669), K. [Zwirska-Korczala](http://www.ncbi.nlm.nih.gov/pubmed?term=Zwirska-Korczala%20K%5BAuthor%5D&cauthor=true&cauthor_uid=22535669), M. [Skonieczna](http://www.ncbi.nlm.nih.gov/pubmed?term=Skonieczna%20M%5BAuthor%5D&cauthor=true&cauthor_uid=22535669), A. [Monsiol](http://www.ncbi.nlm.nih.gov/pubmed?term=Monsiol%20A%5BAuthor%5D&cauthor=true&cauthor_uid=22535669), M. [Kukla](http://www.ncbi.nlm.nih.gov/pubmed?term=Kukla%20M%5BAuthor%5D&cauthor=true&cauthor_uid=22535669), A. [Duława-Bułdak](http://www.ncbi.nlm.nih.gov/pubmed?term=Du%C5%82awa-Bu%C5%82dak%20A%5BAuthor%5D&cauthor=true&cauthor_uid=22535669), and E. [Birkner](http://www.ncbi.nlm.nih.gov/pubmed?term=Birkner%20E%5BAuthor%5D&cauthor=true&cauthor_uid=22535669). 2012. Short-term exposure to 50 Hz ELF-EMF alters the cisplatin-induced oxidative response in AT478 murine squamous cell carcinoma cells. [*Bioelectromagnetics*](http://www.ncbi.nlm.nih.gov/pubmed/22535669) 33:641-51.

[Calabrò, E](http://www.ncbi.nlm.nih.gov/pubmed/?term=Calabr%C3%B2%20E%5BAuthor%5D&cauthor=true&cauthor_uid=24217848)., S. [Condello](http://www.ncbi.nlm.nih.gov/pubmed/?term=Condello%20S%5BAuthor%5D&cauthor=true&cauthor_uid=24217848), M. [Currò](http://www.ncbi.nlm.nih.gov/pubmed/?term=Curr%C3%B2%20M%5BAuthor%5D&cauthor=true&cauthor_uid=24217848), N. [Ferlazzo](http://www.ncbi.nlm.nih.gov/pubmed/?term=Ferlazzo%20N%5BAuthor%5D&cauthor=true&cauthor_uid=24217848), D. [Caccamo](http://www.ncbi.nlm.nih.gov/pubmed/?term=Caccamo%20D%5BAuthor%5D&cauthor=true&cauthor_uid=24217848), S. [Magazù](http://www.ncbi.nlm.nih.gov/pubmed/?term=Magaz%C3%B9%20S%5BAuthor%5D&cauthor=true&cauthor_uid=24217848), and R. [Ientile](http://www.ncbi.nlm.nih.gov/pubmed/?term=Ientile%20R%5BAuthor%5D&cauthor=true&cauthor_uid=24217848). 2013. Effects of low intensity static magnetic field on FTIR spectra and ROS production in SH-SY5Y neuronal-like cells. [*Bioelectromagnetics*](http://www.ncbi.nlm.nih.gov/pubmed/24217848) 34:618-29.

[Chauhan, P](https://www.ncbi.nlm.nih.gov/pubmed/?term=Chauhan%20P%5BAuthor%5D&cauthor=true&cauthor_uid=27362544)., H.N. [Verma](https://www.ncbi.nlm.nih.gov/pubmed/?term=Verma%20HN%5BAuthor%5D&cauthor=true&cauthor_uid=27362544), R. [Sisodia](https://www.ncbi.nlm.nih.gov/pubmed/?term=Sisodia%20R%5BAuthor%5D&cauthor=true&cauthor_uid=27362544), and K.K. [Kesari](https://www.ncbi.nlm.nih.gov/pubmed/?term=Kesari%20KK%5BAuthor%5D&cauthor=true&cauthor_uid=27362544). 2017. Microwave radiation (2.45 GHz)-induced oxidative stress: Whole-body exposure effect on histopathology of Wistar rats. [*Electromagn. Biol. Med*](https://www.ncbi.nlm.nih.gov/pubmed/27362544) 36:20-30.

[Chen, Y.B](http://www.ncbi.nlm.nih.gov/pubmed?term=%22Chen%20YB%22%5BAuthor%5D)., J. [Li, J](http://www.ncbi.nlm.nih.gov/pubmed?term=%22Li%20J%22%5BAuthor%5D).Y. [Liu](http://www.ncbi.nlm.nih.gov/pubmed?term=%22Liu%20JY%22%5BAuthor%5D), L.H. [Zeng](http://www.ncbi.nlm.nih.gov/pubmed?term=%22Zeng%20LH%22%5BAuthor%5D), Y. [Wan, Y](http://www.ncbi.nlm.nih.gov/pubmed?term=%22Wan%20Y%22%5BAuthor%5D).R. [Li](http://www.ncbi.nlm.nih.gov/pubmed?term=%22Li%20YR%22%5BAuthor%5D), D. [Ren](http://www.ncbi.nlm.nih.gov/pubmed?term=%22Ren%20D%22%5BAuthor%5D), and G.Z. [Guo](http://www.ncbi.nlm.nih.gov/pubmed?term=%22Guo%20GZ%22%5BAuthor%5D). 2011. Effect of Electromagnetic Pulses (EMP) on associative learning in mice and a preliminary study of mechanism. [*Int. J. Radiat. Biol*](http://www.ncbi.nlm.nih.gov/pubmed/21929296##) 87:1147-54.

[Chu, L.Y](http://www.ncbi.nlm.nih.gov/pubmed?term=Chu%20LY%5BAuthor%5D&cauthor=true&cauthor_uid=22131325)., J.H. [Lee](http://www.ncbi.nlm.nih.gov/pubmed?term=Lee%20JH%5BAuthor%5D&cauthor=true&cauthor_uid=22131325), Y.S. [Nam, Y.J.](http://www.ncbi.nlm.nih.gov/pubmed?term=Nam%20YS%5BAuthor%5D&cauthor=true&cauthor_uid=22131325) [Lee](http://www.ncbi.nlm.nih.gov/pubmed?term=Lee%20YJ%5BAuthor%5D&cauthor=true&cauthor_uid=22131325), W.H. [Park,](http://www.ncbi.nlm.nih.gov/pubmed?term=Park%20WH%5BAuthor%5D&cauthor=true&cauthor_uid=22131325) B.C. [Lee](http://www.ncbi.nlm.nih.gov/pubmed?term=Lee%20BC%5BAuthor%5D&cauthor=true&cauthor_uid=22131325), D. [Kim](http://www.ncbi.nlm.nih.gov/pubmed?term=Kim%20D%5BAuthor%5D&cauthor=true&cauthor_uid=22131325), Y.H. [Chung, and J.H](http://www.ncbi.nlm.nih.gov/pubmed?term=Chung%20YH%5BAuthor%5D&cauthor=true&cauthor_uid=22131325). [Jeong](http://www.ncbi.nlm.nih.gov/pubmed?term=Jeong%20JH%5BAuthor%5D&cauthor=true&cauthor_uid=22131325). 2011. Extremely low frequency magnetic field induces oxidative stress in mouse cerebellum. [*Gen. Physiol. Biophys*](http://www.ncbi.nlm.nih.gov/pubmed/22131325) 30:415-21.

[Ciejka, E](http://www.ncbi.nlm.nih.gov/pubmed?term=Ciejka%20E%5BAuthor%5D&cauthor=true&cauthor_uid=22314568)., P. [Kleniewska](http://www.ncbi.nlm.nih.gov/pubmed?term=Kleniewska%20P%5BAuthor%5D&cauthor=true&cauthor_uid=22314568), B. [Skibska](http://www.ncbi.nlm.nih.gov/pubmed?term=Skibska%20B%5BAuthor%5D&cauthor=true&cauthor_uid=22314568), and A. [Goraca](http://www.ncbi.nlm.nih.gov/pubmed?term=Goraca%20A%5BAuthor%5D&cauthor=true&cauthor_uid=22314568). 2011. Effects of extremely low frequency magnetic field on oxidative balance in brain of rats. [*J. Physiol. Pharmacol*](http://www.ncbi.nlm.nih.gov/pubmed/22314568) 62:657-61.

[Coşkun, S](http://www.ncbi.nlm.nih.gov/pubmed?term=%22Co%C5%9Fkun%20S%22%5BAuthor%5D)., B. [Balabanli](http://www.ncbi.nlm.nih.gov/pubmed?term=%22Balabanli%20B%22%5BAuthor%5D), A. [Canseven](http://www.ncbi.nlm.nih.gov/pubmed?term=%22Canseven%20A%22%5BAuthor%5D), and N. [Seyhan](http://www.ncbi.nlm.nih.gov/pubmed?term=%22Seyhan%20N%22%5BAuthor%5D). 2009. Effects of continuous and intermittent magnetic fields on oxidative parameters in vivo. [*Neurochem. Res*](javascript:AL_get(this,%20'jour',%20'Neurochem%20%0d%0aRes.');) 34:238-43.

da Costa C.C., L.A.M. Martins, A.P. Koth, J.M.O. Ramos, F.T.C.R. Guma, C.M. de Oliveira, N.S. Pedra, G. Fischer, E.S. Helena, C.R. Gioda, P.R.S. Sanches, A.S.V. Junior, M.S.P. Soares, R.M. Spanevello, G.D. Gamaro, and I.C.C. de Souza. 2021. Static magnetic stimulation induces changes in the oxidative status and cell viability parameters in a primary culture model of astrocytes. *Cell. Biochem. Biophys* 79:873-85.

De Iuliis, G.N., R.J. Newey, B.V. King, and R.J. Aitken. 2009. Mobile phone radiation induces reactive oxygen species production and DNA damage in human spermatozoa in vitro. *PLoS ONE* 4:e6446.

[Deshmukh, P.S](http://www.ncbi.nlm.nih.gov/pubmed?term=Deshmukh%20PS%5BAuthor%5D&cauthor=true&cauthor_uid=23720885)., B.D. [Banerjee](http://www.ncbi.nlm.nih.gov/pubmed?term=Banerjee%20BD%5BAuthor%5D&cauthor=true&cauthor_uid=23720885), M.P. [Abegaonkar](http://www.ncbi.nlm.nih.gov/pubmed?term=Abegaonkar%20MP%5BAuthor%5D&cauthor=true&cauthor_uid=23720885), K. [Megha](http://www.ncbi.nlm.nih.gov/pubmed?term=Megha%20K%5BAuthor%5D&cauthor=true&cauthor_uid=23720885), R.S. [Ahmed](http://www.ncbi.nlm.nih.gov/pubmed?term=Ahmed%20RS%5BAuthor%5D&cauthor=true&cauthor_uid=23720885), A.K. [Tripathi](http://www.ncbi.nlm.nih.gov/pubmed?term=Tripathi%20AK%5BAuthor%5D&cauthor=true&cauthor_uid=23720885), and P.K. [Mediratta](http://www.ncbi.nlm.nih.gov/pubmed?term=Mediratta%20PK%5BAuthor%5D&cauthor=true&cauthor_uid=23720885). 2013. Effect of low level microwave radiation exposure on cognitive function and oxidative stress in rats. [*Indian J. Biochem. Biophys*](http://www.ncbi.nlm.nih.gov/pubmed/23720885) 50:114-9.

[Djordjevic, B](http://www.ncbi.nlm.nih.gov/pubmed/?term=Djordjevic%20B%5BAuthor%5D&cauthor=true&cauthor_uid=25665474)., D. [Sokolovic](http://www.ncbi.nlm.nih.gov/pubmed/?term=Sokolovic%20D%5BAuthor%5D&cauthor=true&cauthor_uid=25665474), G. [Kocic](http://www.ncbi.nlm.nih.gov/pubmed/?term=Kocic%20G%5BAuthor%5D&cauthor=true&cauthor_uid=25665474), A. [Veljkovic](http://www.ncbi.nlm.nih.gov/pubmed/?term=Veljkovic%20A%5BAuthor%5D&cauthor=true&cauthor_uid=25665474), M. [Despotovic](http://www.ncbi.nlm.nih.gov/pubmed/?term=Despotovic%20M%5BAuthor%5D&cauthor=true&cauthor_uid=25665474), J. [Basic](http://www.ncbi.nlm.nih.gov/pubmed/?term=Basic%20J%5BAuthor%5D&cauthor=true&cauthor_uid=25665474), T. [Jevtovic-Stoimenov](http://www.ncbi.nlm.nih.gov/pubmed/?term=Jevtovic-Stoimenov%20T%5BAuthor%5D&cauthor=true&cauthor_uid=25665474), and D.M. [Sokolovic](http://www.ncbi.nlm.nih.gov/pubmed/?term=Sokolovic%20DM%5BAuthor%5D&cauthor=true&cauthor_uid=25665474). 2015. The effect of melatonin on the liver of rats exposed to microwave radiation. [*Bratisl. Lek. Listy*](http://www.ncbi.nlm.nih.gov/pubmed/25665474?dopt=Abstract) 116:96-100.

[Duan, W](http://www.ncbi.nlm.nih.gov/pubmed/?term=Duan%20W%5BAuthor%5D&cauthor=true&cauthor_uid=25688995)., C. [Liu](http://www.ncbi.nlm.nih.gov/pubmed/?term=Liu%20C%5BAuthor%5D&cauthor=true&cauthor_uid=25688995), L. [Zhang](http://www.ncbi.nlm.nih.gov/pubmed/?term=Zhang%20L%5BAuthor%5D&cauthor=true&cauthor_uid=25688995), M. [He](http://www.ncbi.nlm.nih.gov/pubmed/?term=He%20M%5BAuthor%5D&cauthor=true&cauthor_uid=25688995), S. [Xu](http://www.ncbi.nlm.nih.gov/pubmed/?term=Xu%20S%5BAuthor%5D&cauthor=true&cauthor_uid=25688995), C. [Chen](http://www.ncbi.nlm.nih.gov/pubmed/?term=Chen%20C%5BAuthor%5D&cauthor=true&cauthor_uid=25688995), H. [Pi](http://www.ncbi.nlm.nih.gov/pubmed/?term=Pi%20H%5BAuthor%5D&cauthor=true&cauthor_uid=25688995), P. [Gao](http://www.ncbi.nlm.nih.gov/pubmed/?term=Gao%20P%5BAuthor%5D&cauthor=true&cauthor_uid=25688995), Y. [Zhang](http://www.ncbi.nlm.nih.gov/pubmed/?term=Zhang%20Y%5BAuthor%5D&cauthor=true&cauthor_uid=25688995), M. [Zhong](http://www.ncbi.nlm.nih.gov/pubmed/?term=Zhong%20M%5BAuthor%5D&cauthor=true&cauthor_uid=25688995), Z. [Yu, and Z](http://www.ncbi.nlm.nih.gov/pubmed/?term=Yu%20Z%5BAuthor%5D&cauthor=true&cauthor_uid=25688995). [Zhou](http://www.ncbi.nlm.nih.gov/pubmed/?term=Zhou%20Z%5BAuthor%5D&cauthor=true&cauthor_uid=25688995). 2015. Comparison of the genotoxic effects induced by 50 Hz extremely low-frequency electromagnetic fields and 1800 MHz radiofrequency electromagnetic fields in GC-2 cells. [*Radiat. Res*](http://www.ncbi.nlm.nih.gov/pubmed/25688995) 183:305-14.

[Eleuteri](https://pubmed.ncbi.nlm.nih.gov/?sort=date&term=Eleuteri+AM&cauthor_id=19672456), [A.M](https://pubmed.ncbi.nlm.nih.gov/19672456/#affiliation-1)., M. [Amici](https://pubmed.ncbi.nlm.nih.gov/?sort=date&term=Amici+M&cauthor_id=19672456), L. [Bonfili](https://pubmed.ncbi.nlm.nih.gov/?sort=date&term=Bonfili+L&cauthor_id=19672456), V. [Cecarini](https://pubmed.ncbi.nlm.nih.gov/?sort=date&term=Cecarini+V&cauthor_id=19672456), M. [Cuccioloni](https://pubmed.ncbi.nlm.nih.gov/?sort=date&term=Cuccioloni+M&cauthor_id=19672456), S. [Grimaldi](https://pubmed.ncbi.nlm.nih.gov/?sort=date&term=Grimaldi+S&cauthor_id=19672456),  [L. Giuliani](https://pubmed.ncbi.nlm.nih.gov/?sort=date&term=Giuliani+L&cauthor_id=19672456), M. [Angeletti](https://pubmed.ncbi.nlm.nih.gov/?sort=date&term=Angeletti+M&cauthor_id=19672456), and E.  [Fioretti](https://pubmed.ncbi.nlm.nih.gov/?sort=date&term=Fioretti+E&cauthor_id=19672456). 2009. 50 Hz extremely low frequency electromagnetic fields enhance protein carbonyl groups content in cancer cells: effects on proteasomal systems. *J. Biomed. Biotechnol* 2009:834239.

[Emre, M](http://www.ncbi.nlm.nih.gov/pubmed?term=Emre%20M%5BAuthor%5D&cauthor=true&cauthor_uid=20824388)., S. [Cetiner, S](http://www.ncbi.nlm.nih.gov/pubmed?term=Cetiner%20S%5BAuthor%5D&cauthor=true&cauthor_uid=20824388). [Zencir](http://www.ncbi.nlm.nih.gov/pubmed?term=Zencir%20S%5BAuthor%5D&cauthor=true&cauthor_uid=20824388), I. [Unlukurt, I](http://www.ncbi.nlm.nih.gov/pubmed?term=Unlukurt%20I%5BAuthor%5D&cauthor=true&cauthor_uid=20824388). [Kahraman](http://www.ncbi.nlm.nih.gov/pubmed?term=Kahraman%20I%5BAuthor%5D&cauthor=true&cauthor_uid=20824388), and Z. [Topcu](http://www.ncbi.nlm.nih.gov/pubmed?term=Topcu%20Z%5BAuthor%5D&cauthor=true&cauthor_uid=20824388). 2011. Oxidative stress and apoptosis in relation to exposure to magnetic field. [*Cell. Biochem. Biophys*](http://www.ncbi.nlm.nih.gov/pubmed/20824388) 59:71-7.

[Erdal, N](http://www.ncbi.nlm.nih.gov/pubmed?term=%22Erdal%20N%22%5BAuthor%5D)., S. [Gürgül, L.](http://www.ncbi.nlm.nih.gov/pubmed?term=%22G%C3%BCrg%C3%BCl%20S%22%5BAuthor%5D) [Tamer, and L](http://www.ncbi.nlm.nih.gov/pubmed?term=%22Tamer%20L%22%5BAuthor%5D). [Ayaz](http://www.ncbi.nlm.nih.gov/pubmed?term=%22Ayaz%20L%22%5BAuthor%5D). 2008. Effects of long-term exposure of extremely low frequency magnetic field on oxidative/nitrosative stress in rat liver. [*J. Radiat. Res. (Tokyo)*](javascript:AL_get(this,%20'jour',%20'J%20Radiat%20%0d%0aRes%20(Tokyo).');) 49:181-7.

[Esmekaya, M.A](http://www.ncbi.nlm.nih.gov/pubmed?term=%22Esmekaya%20MA%22%5BAuthor%5D)., C. [Ozer](http://www.ncbi.nlm.nih.gov/pubmed?term=%22Ozer%20C%22%5BAuthor%5D), and N. [Seyhan](http://www.ncbi.nlm.nih.gov/pubmed?term=%22Seyhan%20N%22%5BAuthor%5D). 2011. 900 MHz pulse-modulated radiofrequency radiation induces oxidative stress on heart, lung, testis and liver tissues. [*Gen. Physiol. Biophys*](http://www.ncbi.nlm.nih.gov/pubmed/21460416##) 30:84-9.

[Esmekaya, M.A](http://www.ncbi.nlm.nih.gov/pubmed/?term=Esmekaya%20MA%5BAuthor%5D&cauthor=true&cauthor_uid=26836107)., M.Z. [Tuysuz](http://www.ncbi.nlm.nih.gov/pubmed/?term=Tuysuz%20MZ%5BAuthor%5D&cauthor=true&cauthor_uid=26836107), A. [Tomruk](http://www.ncbi.nlm.nih.gov/pubmed/?term=Tomruk%20A%5BAuthor%5D&cauthor=true&cauthor_uid=26836107), A.G. [Canseven](http://www.ncbi.nlm.nih.gov/pubmed/?term=Canseven%20AG%5BAuthor%5D&cauthor=true&cauthor_uid=26836107), E. [Yücel](http://www.ncbi.nlm.nih.gov/pubmed/?term=Y%C3%BCcel%20E%5BAuthor%5D&cauthor=true&cauthor_uid=26836107), Z. [Aktuna](http://www.ncbi.nlm.nih.gov/pubmed/?term=Aktuna%20Z%5BAuthor%5D&cauthor=true&cauthor_uid=26836107), S. [Keskil](http://www.ncbi.nlm.nih.gov/pubmed/?term=Keskil%20S%5BAuthor%5D&cauthor=true&cauthor_uid=26836107), and N. [Seyhan](http://www.ncbi.nlm.nih.gov/pubmed/?term=Seyhan%20N%5BAuthor%5D&cauthor=true&cauthor_uid=26836107). 2016. Effects of cell phone radiation on lipid peroxidation, glutathione and nitric oxide levels in mouse brain during epileptic seizure. [*J. Chem. Neuroanat*](http://www.ncbi.nlm.nih.gov/pubmed/26836107) 75(pt. B):111-5.

Furtado-Filho, O.V., J.B. Borba, T. Maraschin, L.M. Souza, J.A. Jose, C.F. Moreira, and J. Saffi. 2015. Effects of chronic exposure to 950 MHz ultra-high-frequency electromagnetic radiation on reactive oxygen species metabolism in the right and left cerebral cortex of young rats of different ages. *Int. J. Radiat. Biol* 91:891-7.

[Gajski, G](http://www.ncbi.nlm.nih.gov/pubmed?term=%22Gajski%20G%22%5BAuthor%5D)., and V. [Garaj-Vrhovac](http://www.ncbi.nlm.nih.gov/pubmed?term=%22Garaj-Vrhovac%20V%22%5BAuthor%5D). 2009. Radioprotective effects of honeybee venom (Apis mellifera) against 915-MHz microwave radiation-induced DNA damage in Wistar rat lymphocytes: in vitro study. [*Int. J. Toxicol*](javascript:AL_get(this,%20'jour',%20'Int%20J%20%0d%0aToxicol.');) 28:88-98.

[Giorgi, G](https://www.ncbi.nlm.nih.gov/pubmed/?term=Giorgi%20G%5BAuthor%5D&cauthor=true&cauthor_uid=28258386)., C. [Pirazzini](https://www.ncbi.nlm.nih.gov/pubmed/?term=Pirazzini%20C%5BAuthor%5D&cauthor=true&cauthor_uid=28258386), M.G. [Bacalini](https://www.ncbi.nlm.nih.gov/pubmed/?term=Bacalini%20MG%5BAuthor%5D&cauthor=true&cauthor_uid=28258386), C. [Giuliani](https://www.ncbi.nlm.nih.gov/pubmed/?term=Giuliani%20C%5BAuthor%5D&cauthor=true&cauthor_uid=28258386), P. [Garagnani](https://www.ncbi.nlm.nih.gov/pubmed/?term=Garagnani%20P%5BAuthor%5D&cauthor=true&cauthor_uid=28258386), M. [Capri](https://www.ncbi.nlm.nih.gov/pubmed/?term=Capri%20M%5BAuthor%5D&cauthor=true&cauthor_uid=28258386), F. [Bersani](https://www.ncbi.nlm.nih.gov/pubmed/?term=Bersani%20F%5BAuthor%5D&cauthor=true&cauthor_uid=28258386), and B. [Del Re B](https://www.ncbi.nlm.nih.gov/pubmed/?term=Del%20Re%20B%5BAuthor%5D&cauthor=true&cauthor_uid=28258386). 2017. Assessing the combined effect of extremely low-frequency magnetic field exposure and oxidative stress on LINE-1 promoter methylation in human neural cells. [*Radiat. Environ. Biophys*](https://www.ncbi.nlm.nih.gov/pubmed/28258386) 56:193-200.

[Gok, D.K](http://www.ncbi.nlm.nih.gov/pubmed/?term=Gok%20DK%5BAuthor%5D&cauthor=true&cauthor_uid=25496054)., D. [Akpinar](http://www.ncbi.nlm.nih.gov/pubmed/?term=Akpinar%20D%5BAuthor%5D&cauthor=true&cauthor_uid=25496054), E. [Hidisoglu](http://www.ncbi.nlm.nih.gov/pubmed/?term=Hidisoglu%20E%5BAuthor%5D&cauthor=true&cauthor_uid=25496054), S. [Ozen](http://www.ncbi.nlm.nih.gov/pubmed/?term=Ozen%20S%5BAuthor%5D&cauthor=true&cauthor_uid=25496054), A. [Agar](http://www.ncbi.nlm.nih.gov/pubmed/?term=Agar%20A%5BAuthor%5D&cauthor=true&cauthor_uid=25496054), and P. [Yargicoglu](http://www.ncbi.nlm.nih.gov/pubmed/?term=Yargicoglu%20P%5BAuthor%5D&cauthor=true&cauthor_uid=25496054). 2016. The developmental effects of extremely low frequency electric fields on visual and somatosensory evoked potentials in adult rats. [*Electromagn. Biol. Med*](http://www.ncbi.nlm.nih.gov/pubmed/25496054) 35:245-59.

[Gulati, S](https://www.ncbi.nlm.nih.gov/pubmed/?term=Gulati%20S%5BAuthor%5D&cauthor=true&cauthor_uid=28819931)., A. [Yadav](https://www.ncbi.nlm.nih.gov/pubmed/?term=Yadav%20A%5BAuthor%5D&cauthor=true&cauthor_uid=28819931), N. [Kumar](https://www.ncbi.nlm.nih.gov/pubmed/?term=Kumar%20N%5BAuthor%5D&cauthor=true&cauthor_uid=28819931), K. [Priya](https://www.ncbi.nlm.nih.gov/pubmed/?term=Priya%20K%5BAuthor%5D&cauthor=true&cauthor_uid=28819931), N.K. [Aggarwal](https://www.ncbi.nlm.nih.gov/pubmed/?term=Aggarwal%20NK%5BAuthor%5D&cauthor=true&cauthor_uid=28819931), and R. [Gupta](https://www.ncbi.nlm.nih.gov/pubmed/?term=Gupta%20R%5BAuthor%5D&cauthor=true&cauthor_uid=28819931). 2018. Phenotypic and genotypic characterization of antioxidant enzyme system in human population exposed to radiation from mobile towers. [*Mol. Cell Biochem*](https://www.ncbi.nlm.nih.gov/pubmed/28819931) 440:1-9.

Gulati, S., P. Kosik, M. Durdik, M. Skorvaga, L. Jakl, E. Markova, and I. Belyaev. 2020. Effects of different mobile phone UMTS signals on DNA, apoptosis and oxidative stress in human lymphocytes.  *Environ. Pollut* 267:115632.

[Guleken](https://pubmed.ncbi.nlm.nih.gov/?sort=date&term=Guleken+Z&cauthor_id=35189391), [Z](https://pubmed.ncbi.nlm.nih.gov/35189391/#affiliation-1)., M. [Kula-Maximenko](https://pubmed.ncbi.nlm.nih.gov/?sort=date&term=Kula-Maximenko+M&cauthor_id=35189391), J. [Depciuch](https://pubmed.ncbi.nlm.nih.gov/?sort=date&term=Depciuch+J&cauthor_id=35189391), A.M. [Kılıç](https://pubmed.ncbi.nlm.nih.gov/?sort=date&term=K%C4%B1l%C4%B1%C3%A7+AM&cauthor_id=35189391), and D. [Sarıbal](https://pubmed.ncbi.nlm.nih.gov/?sort=date&term=Sar%C4%B1bal+D&cauthor_id=35189391). 2022. Detection of the chemical changes in blood, liver, and brain caused by electromagnetic field exposure using Raman spectroscopy, biochemical assays combined with multivariate analyses. *Photodiagnosis Photodyn. Ther* 38:102779.

[Güler, G](http://www.ncbi.nlm.nih.gov/pubmed?term=%22Guler%20G%22%5BAuthor%5D)., A. [Tomruk](http://www.ncbi.nlm.nih.gov/pubmed?term=%22Tomruk%20A%22%5BAuthor%5D), E. [Ozgur](http://www.ncbi.nlm.nih.gov/pubmed?term=%22Ozgur%20E%22%5BAuthor%5D), and N. [Seyhan](http://www.ncbi.nlm.nih.gov/pubmed?term=%22Seyhan%20N%22%5BAuthor%5D). 2010. The effect of radiofrequency radiation on DNA and lipid damage in non-pregnant and pregnant rabbits and their newborns. [*Gen. Physiol. Biophys*](javascript:AL_get(this,%20'jour',%20'Gen%20%0d%0aPhysiol%20Biophys.');)29:59-66.

[Güler, G](http://www.ncbi.nlm.nih.gov/pubmed?term=G%C3%BCler%20G%5BAuthor%5D&cauthor=true&cauthor_uid=22145622)., A. [Tomruk](http://www.ncbi.nlm.nih.gov/pubmed?term=Tomruk%20A%5BAuthor%5D&cauthor=true&cauthor_uid=22145622), E. [Ozgur](http://www.ncbi.nlm.nih.gov/pubmed?term=Ozgur%20E%5BAuthor%5D&cauthor=true&cauthor_uid=22145622), D. [Sahin](http://www.ncbi.nlm.nih.gov/pubmed?term=Sahin%20D%5BAuthor%5D&cauthor=true&cauthor_uid=22145622), A. [Sepici](http://www.ncbi.nlm.nih.gov/pubmed?term=Sepici%20A%5BAuthor%5D&cauthor=true&cauthor_uid=22145622), N. [Altan](http://www.ncbi.nlm.nih.gov/pubmed?term=Altan%20N%5BAuthor%5D&cauthor=true&cauthor_uid=22145622), and N. [Seyhan](http://www.ncbi.nlm.nih.gov/pubmed?term=Seyhan%20N%5BAuthor%5D&cauthor=true&cauthor_uid=22145622). 2012. The effect of radiofrequency radiation on DNA and lipid damage in female and male infant rabbits. [*Int. J. Radiat. Biol*](http://www.ncbi.nlm.nih.gov/pubmed/22145622)88:367-73.

[Guler, G](http://www.ncbi.nlm.nih.gov/pubmed?term=%22Guler%20G%22%5BAuthor%5D)., Z. [Turkozer](http://www.ncbi.nlm.nih.gov/pubmed?term=%22Turkozer%20Z%22%5BAuthor%5D), A. [Tomruk](http://www.ncbi.nlm.nih.gov/pubmed?term=%22Tomruk%20A%22%5BAuthor%5D), and N. [Seyhan](http://www.ncbi.nlm.nih.gov/pubmed?term=%22Seyhan%20N%22%5BAuthor%5D). 2008. The protective effects of N-acetyl-L-cysteine and epigallocatechin-3-gallate on electric field-induced hepatic oxidative stress. *I*[*nt. J. Radiat. Biol*](javascript:AL_get(this,%20'jour',%20'Int%20J%20%0d%0aRadiat%20Biol.');) 84:669-80.

[Gürler, H.S](http://www.ncbi.nlm.nih.gov/pubmed?term=G%C3%BCrler%20HS%5BAuthor%5D&cauthor=true&cauthor_uid=24844368)., B. [Bilgici](http://www.ncbi.nlm.nih.gov/pubmed?term=Bilgici%20B%5BAuthor%5D&cauthor=true&cauthor_uid=24844368), A.K. [Akar](http://www.ncbi.nlm.nih.gov/pubmed?term=Akar%20AK%5BAuthor%5D&cauthor=true&cauthor_uid=24844368), L. [Tomak](http://www.ncbi.nlm.nih.gov/pubmed?term=Tomak%20L%5BAuthor%5D&cauthor=true&cauthor_uid=24844368), and A. [Bedir](http://www.ncbi.nlm.nih.gov/pubmed?term=Bedir%20A%5BAuthor%5D&cauthor=true&cauthor_uid=24844368). 2014. Increased DNA oxidation (8-OHdG) and protein oxidation (AOPP) by Low level electromagnetic field (2.45 GHz) in rat brain and protective effect of garlic. [*Int. J. Radiat. Biol*](http://www.ncbi.nlm.nih.gov/pubmed/24844368) 90:892-6.

[Guney, M](http://www.ncbi.nlm.nih.gov/sites/entrez?Db=pubmed&Cmd=Search&Term=%22Guney%20M%22%5BAuthor%5D&itool=EntrezSystem2.PEntrez.Pubmed.Pubmed_ResultsPanel.Pubmed_DiscoveryPanel.Pubmed_RVAbstractPlus)., F. [Ozguner](http://www.ncbi.nlm.nih.gov/sites/entrez?Db=pubmed&Cmd=Search&Term=%22Ozguner%20F%22%5BAuthor%5D&itool=EntrezSystem2.PEntrez.Pubmed.Pubmed_ResultsPanel.Pubmed_DiscoveryPanel.Pubmed_RVAbstractPlus), B. [Oral](http://www.ncbi.nlm.nih.gov/sites/entrez?Db=pubmed&Cmd=Search&Term=%22Oral%20B%22%5BAuthor%5D&itool=EntrezSystem2.PEntrez.Pubmed.Pubmed_ResultsPanel.Pubmed_DiscoveryPanel.Pubmed_RVAbstractPlus), N. [Karahan](http://www.ncbi.nlm.nih.gov/sites/entrez?Db=pubmed&Cmd=Search&Term=%22Karahan%20N%22%5BAuthor%5D&itool=EntrezSystem2.PEntrez.Pubmed.Pubmed_ResultsPanel.Pubmed_DiscoveryPanel.Pubmed_RVAbstractPlus), and T. [Mungan](http://www.ncbi.nlm.nih.gov/sites/entrez?Db=pubmed&Cmd=Search&Term=%22Mungan%20T%22%5BAuthor%5D&itool=EntrezSystem2.PEntrez.Pubmed.Pubmed_ResultsPanel.Pubmed_DiscoveryPanel.Pubmed_RVAbstractPlus). 2007. 900 MHz radiofrequency-induced histopathologic changes and oxidative stress in rat endometrium: protection by vitamins E and C. [*Toxicol. Ind. Health*](javascript:AL_get(this,%20'jour',%20'Toxicol%20Ind%20Health.');) 23:411-20.

[Hancı, H](http://www.ncbi.nlm.nih.gov/pubmed?term=Hanc%C4%B1%20H%5BAuthor%5D&cauthor=true&cauthor_uid=24095929)., E. [Odacı](http://www.ncbi.nlm.nih.gov/pubmed?term=Odac%C4%B1%20E%5BAuthor%5D&cauthor=true&cauthor_uid=24095929), H. [Kaya](http://www.ncbi.nlm.nih.gov/pubmed?term=Kaya%20H%5BAuthor%5D&cauthor=true&cauthor_uid=24095929), Y. [Aliyazıcıoğlu](http://www.ncbi.nlm.nih.gov/pubmed?term=Aliyaz%C4%B1c%C4%B1o%C4%9Flu%20Y%5BAuthor%5D&cauthor=true&cauthor_uid=24095929), I. [Turan](http://www.ncbi.nlm.nih.gov/pubmed?term=Turan%20I%5BAuthor%5D&cauthor=true&cauthor_uid=24095929), S. [Demir, and S](http://www.ncbi.nlm.nih.gov/pubmed?term=Demir%20S%5BAuthor%5D&cauthor=true&cauthor_uid=24095929). [Colakoğlu](http://www.ncbi.nlm.nih.gov/pubmed?term=Colako%C4%9Flu%20S%5BAuthor%5D&cauthor=true&cauthor_uid=24095929). 2013. The effect of prenatal exposure to 900-MHz electromagnetic field on the 21-old-day rat testicle. [*Reprod. Toxicol*](http://www.ncbi.nlm.nih.gov/pubmed/24095929) 42:203-9.

[Hashish, A.H](http://www.ncbi.nlm.nih.gov/pubmed?term=%22Hashish%20AH%22%5BAuthor%5D)., M.A. [El-Missiry](http://www.ncbi.nlm.nih.gov/pubmed?term=%22El-Missiry%20MA%22%5BAuthor%5D), H.I. [Abdelkader](http://www.ncbi.nlm.nih.gov/pubmed?term=%22Abdelkader%20HI%22%5BAuthor%5D), and R.H. [Abou-Saleh](http://www.ncbi.nlm.nih.gov/pubmed?term=%22Abou-Saleh%20RH%22%5BAuthor%5D). 2008. Assessment of biological changes of continuous whole body exposure to static magnetic field and extremely low frequency electromagnetic fields in mice. [*Ecotoxicol. Environ. Saf*](javascript:AL_get(this,%20'jour',%20'Ecotoxicol%0d%0a%20Environ%20Saf.');) 71:895-902.

Hernández-Morales, M., T. Shang, J. Chen, V. Han, and C. Liu. 2020. Lipid oxidation induced by RF waves and mediated by ferritin iron causes activation of ferritin-tagged ion channels. *Cell. Rep* 30:3250-60.

[Hosseinabadi](https://pubmed.ncbi.nlm.nih.gov/?sort=pubdate&term=Bagheri+Hosseinabadi+M&cauthor_id=32925155),[M.B](https://pubmed.ncbi.nlm.nih.gov/32925155/#affiliation-1)., N. [Khanjani](https://pubmed.ncbi.nlm.nih.gov/?sort=pubdate&term=Khanjani+N&cauthor_id=32925155), P. [Norouzi](https://pubmed.ncbi.nlm.nih.gov/?sort=pubdate&term=Norouzi+P&cauthor_id=32925155), S.R. [Mirbadie](https://pubmed.ncbi.nlm.nih.gov/?sort=pubdate&term=Mirbadie+SR&cauthor_id=32925155), M.  [Fazli](https://pubmed.ncbi.nlm.nih.gov/?sort=pubdate&term=Fazli+M&cauthor_id=32925155), and[M](https://pubmed.ncbi.nlm.nih.gov/32925155/#affiliation-3).  [Mirzaii](https://pubmed.ncbi.nlm.nih.gov/?sort=pubdate&term=Mirzaii+M&cauthor_id=32925155). 2021. Oxidative stress associated with long term occupational exposure to extremely low frequency electric and magnetic fields. *Work* 68:379-86.

[Houston, B.J](https://www.ncbi.nlm.nih.gov/pubmed/?term=Houston%20BJ%5BAuthor%5D&cauthor=true&cauthor_uid=30298125)., B. [Nixon](https://www.ncbi.nlm.nih.gov/pubmed/?term=Nixon%20B%5BAuthor%5D&cauthor=true&cauthor_uid=30298125), B.V. [King](https://www.ncbi.nlm.nih.gov/pubmed/?term=King%20BV%5BAuthor%5D&cauthor=true&cauthor_uid=30298125), R.J. [Aitken](https://www.ncbi.nlm.nih.gov/pubmed/?term=Aitken%20RJ%5BAuthor%5D&cauthor=true&cauthor_uid=30298125), and G.N. [De Iuliis](https://www.ncbi.nlm.nih.gov/pubmed/?term=De%20Iuliis%20GN%5BAuthor%5D&cauthor=true&cauthor_uid=30298125). 2018. Probing the origins of 1,800 MHz radio frequency electromagnetic radiation induced damage in mouse immortalized germ cells and spermatozoa *in vitro*. [*Front. Public Health*](https://www.ncbi.nlm.nih.gov/pubmed/30298125) 6:270.

Houston, B.J., B. Nixon, K.E. McEwan, J.H. Martin, B.V. King, R.J. Aitken, and G.N. De Iuliis. 2019. Whole-body exposures to radiofrequency-electromagnetic energy can cause DNA damage in mouse spermatozoa via an oxidative mechanism. *Sci. Rep* 9:17478.

Ivancsits, S., E. Diem, O. Jahn, and H.W. Rüdiger. 2003a. [Intermittent extremely low frequency electromagnetic fields cause DNA damage in a dose-dependent way.](https://pubmed.ncbi.nlm.nih.gov/12802592/) *Int. Arch. Occup. Environ. Health* 76:431-6.

Ivancsits, S., E. Diem, O. Jahn, H.W. Rudiger. 2003b. Age-related effects on induction of DNA

strand breaks by intermittent exposure to electromagnetic fields. *Mech. Ageing Dev*

124:847-50.

[Jajte, J](http://www.ncbi.nlm.nih.gov/pubmed?term=%22Jajte%20J%22%5BAuthor%5D)., M. [Zmyślony](http://www.ncbi.nlm.nih.gov/pubmed?term=%22Zmy%C5%9Blony%20M%22%5BAuthor%5D), J. [Palus](http://www.ncbi.nlm.nih.gov/pubmed?term=%22Palus%20J%22%5BAuthor%5D), E. [Dziubałtowska, and E](http://www.ncbi.nlm.nih.gov/pubmed?term=%22Dziuba%C5%82towska%20E%22%5BAuthor%5D). [Rajkowska](http://www.ncbi.nlm.nih.gov/pubmed?term=%22Rajkowska%20E%22%5BAuthor%5D). 2001. Protective effect of melatonin against in vitro iron ions and 7 mT 50 Hz magnetic field-induced DNA damage in rat lymphocytes. [*Mutat. Res*](javascript:AL_get(this,%20'jour',%20'Mutat%20%0d%0aRes.');) 483:57-64.

[Jajte, J](http://www.ncbi.nlm.nih.gov/pubmed/?term=Jajte%20J%5BAuthor%5D&cauthor=true&cauthor_uid=12160605)., J. [Grzegorczyk](http://www.ncbi.nlm.nih.gov/pubmed/?term=Grzegorczyk%20J%5BAuthor%5D&cauthor=true&cauthor_uid=12160605), M. [Zmyślony](http://www.ncbi.nlm.nih.gov/pubmed/?term=Zmy%C5%9Blony%20M%5BAuthor%5D&cauthor=true&cauthor_uid=12160605), and E. [Rajkowska](http://www.ncbi.nlm.nih.gov/pubmed/?term=Rajkowska%20E%5BAuthor%5D&cauthor=true&cauthor_uid=12160605). 2002. Effect of 7 mT static magnetic field and iron ions on rat lymphocytes: apoptosis, necrosis and free radical processes. [*Bioelectrochemistry*](http://www.ncbi.nlm.nih.gov/pubmed/12160605) 57:107-11.

[Jelenković, A](http://www.ncbi.nlm.nih.gov/pubmed?term=%22Jelenkovi%C4%87%20A%22%5BAuthor%5D)., B. [Janać](http://www.ncbi.nlm.nih.gov/pubmed?term=%22Jana%C4%87%20B%22%5BAuthor%5D), V. [Pesić](http://www.ncbi.nlm.nih.gov/pubmed?term=%22Pesi%C4%87%20V%22%5BAuthor%5D), D.M. [Jovanović](http://www.ncbi.nlm.nih.gov/pubmed?term=%22Jovanovi%C4%87%20DM%22%5BAuthor%5D), I. [Vasiljević](http://www.ncbi.nlm.nih.gov/pubmed?term=%22Vasiljevi%C4%87%20I%22%5BAuthor%5D), and Z. [Prolić](http://www.ncbi.nlm.nih.gov/pubmed?term=%22Proli%C4%87%20Z%22%5BAuthor%5D). 2006. Effects of extremely low-frequency magnetic field in the brain of rats. [*Brain Res. Bull*](javascript:AL_get(this,%20'jour',%20'Brain%20Res%20%0d%0aBull.');) 68:355-60.

[Jeong, Y.J](https://www.ncbi.nlm.nih.gov/pubmed/?term=Jeong%20YJ%5BAuthor%5D&cauthor=true&cauthor_uid=30029554)., Y. [Son](https://www.ncbi.nlm.nih.gov/pubmed/?term=Son%20Y%5BAuthor%5D&cauthor=true&cauthor_uid=30029554), N.K. [Han](https://www.ncbi.nlm.nih.gov/pubmed/?term=Han%20NK%5BAuthor%5D&cauthor=true&cauthor_uid=30029554), H.D. [Choi](https://www.ncbi.nlm.nih.gov/pubmed/?term=Choi%20HD%5BAuthor%5D&cauthor=true&cauthor_uid=30029554), J.K. [Pack](https://www.ncbi.nlm.nih.gov/pubmed/?term=Pack%20JK%5BAuthor%5D&cauthor=true&cauthor_uid=30029554), N. [Kim](https://www.ncbi.nlm.nih.gov/pubmed/?term=Kim%20N%5BAuthor%5D&cauthor=true&cauthor_uid=30029554), Y.S. [Lee](https://www.ncbi.nlm.nih.gov/pubmed/?term=Lee%20YS%5BAuthor%5D&cauthor=true&cauthor_uid=30029554), and H.J. [Le](https://www.ncbi.nlm.nih.gov/pubmed/?term=Lee%20HJ%5BAuthor%5D&cauthor=true&cauthor_uid=30029554). 2018. Impact of long-term RF-EMF on oxidative stress and neuroinflammation in aging brains of C57BL/6 mice. [*Int. J. Mol. Sci*](https://www.ncbi.nlm.nih.gov/pubmed/30029554) 19:2103.

[Jouni, F.J](http://www.ncbi.nlm.nih.gov/pubmed?term=Jouni%20FJ%5BAuthor%5D&cauthor=true&cauthor_uid=22108253)., P. [Abdolmaleki, and F.](http://www.ncbi.nlm.nih.gov/pubmed?term=Abdolmaleki%20P%5BAuthor%5D&cauthor=true&cauthor_uid=22108253) [Ghanati](http://www.ncbi.nlm.nih.gov/pubmed?term=Ghanati%20F%5BAuthor%5D&cauthor=true&cauthor_uid=22108253). 2012. Oxidative stress in broad bean (Vicia faba L.) induced by static magnetic field under natural radioactivity. [*Mutat. Res*](http://www.ncbi.nlm.nih.gov/pubmed/22108253) 741:116-121.

[Kantar Gok, D](http://www.ncbi.nlm.nih.gov/pubmed?term=Kantar%20Gok%20D%5BAuthor%5D&cauthor=true&cauthor_uid=24811084)., D. [Akpinar](http://www.ncbi.nlm.nih.gov/pubmed?term=Akpinar%20D%5BAuthor%5D&cauthor=true&cauthor_uid=24811084), P. [Yargicoglu](http://www.ncbi.nlm.nih.gov/pubmed?term=Yargicoglu%20P%5BAuthor%5D&cauthor=true&cauthor_uid=24811084), S. [Ozen](http://www.ncbi.nlm.nih.gov/pubmed?term=Ozen%20S%5BAuthor%5D&cauthor=true&cauthor_uid=24811084), M. [Aslan](http://www.ncbi.nlm.nih.gov/pubmed?term=Aslan%20M%5BAuthor%5D&cauthor=true&cauthor_uid=24811084), N. [Demir, N](http://www.ncbi.nlm.nih.gov/pubmed?term=Demir%20N%5BAuthor%5D&cauthor=true&cauthor_uid=24811084). [Derin](http://www.ncbi.nlm.nih.gov/pubmed?term=Derin%20N%5BAuthor%5D&cauthor=true&cauthor_uid=24811084), and A. [Agar](http://www.ncbi.nlm.nih.gov/pubmed?term=Agar%20A%5BAuthor%5D&cauthor=true&cauthor_uid=24811084). 2014. Effects of extremely low-frequency electric fields at different intensities and exposure durations on mismatch negativity. [*Neuroscience*](http://www.ncbi.nlm.nih.gov/pubmed/24811084)272C:154-66.

[Kim, J](http://www.ncbi.nlm.nih.gov/pubmed?term=Kim%20J%5BAuthor%5D&cauthor=true&cauthor_uid=20816755),, C.S. [Ha](http://www.ncbi.nlm.nih.gov/pubmed?term=Ha%20CS%5BAuthor%5D&cauthor=true&cauthor_uid=20816755), H.J. [Lee](http://www.ncbi.nlm.nih.gov/pubmed?term=Lee%20HJ%5BAuthor%5D&cauthor=true&cauthor_uid=20816755), and K. [Song](http://www.ncbi.nlm.nih.gov/pubmed?term=Song%20K%5BAuthor%5D&cauthor=true&cauthor_uid=20816755). 2010. Repetitive exposure to a 60-Hz time-varying magnetic field induces DNA double-strand breaks and apoptosis in human cells. [*Biochem. Biophys. Res. Commun*](http://www.ncbi.nlm.nih.gov/pubmed/20816755)400:739-44.

[Kim, J](http://www.ncbi.nlm.nih.gov/pubmed?term=Kim%20J%5BAuthor%5D&cauthor=true&cauthor_uid=22180328)., Y. [Yoon](http://www.ncbi.nlm.nih.gov/pubmed?term=Yoon%20Y%5BAuthor%5D&cauthor=true&cauthor_uid=22180328), S. [Yun](http://www.ncbi.nlm.nih.gov/pubmed?term=Yun%20S%5BAuthor%5D&cauthor=true&cauthor_uid=22180328), G.S. [Park](http://www.ncbi.nlm.nih.gov/pubmed?term=Park%20GS%5BAuthor%5D&cauthor=true&cauthor_uid=22180328), H.J. [Lee](http://www.ncbi.nlm.nih.gov/pubmed?term=Lee%20HJ%5BAuthor%5D&cauthor=true&cauthor_uid=22180328), and K. [Song](http://www.ncbi.nlm.nih.gov/pubmed?term=Song%20K%5BAuthor%5D&cauthor=true&cauthor_uid=22180328). 2012. Time-varying magnetic fields of 60 Hz at 7 mT induce DNA double-strand breaks and activate DNA damage checkpoints without apoptosis. [*Bioelectromagnetics*](http://www.ncbi.nlm.nih.gov/pubmed/22180328)33:383-93.

[Kim, M.J](http://www.ncbi.nlm.nih.gov/pubmed?term=%22Kim%20MJ%22%5BAuthor%5D)., and S.J. [Rhee](http://www.ncbi.nlm.nih.gov/pubmed?term=%22Rhee%20SJ%22%5BAuthor%5D). 2004. Green tea catechins protect rats from microwave-induced oxidative damage to heart tissue. [*J. Med. Food*](http://www.ncbi.nlm.nih.gov/pubmed/15383222##) 7:299.

[Kthiri, A](https://www.ncbi.nlm.nih.gov/pubmed/?term=Kthiri%20A%5BAuthor%5D&cauthor=true&cauthor_uid=30608963)., S. [Hidouri](https://www.ncbi.nlm.nih.gov/pubmed/?term=Hidouri%20S%5BAuthor%5D&cauthor=true&cauthor_uid=30608963), T. [Wiem](https://www.ncbi.nlm.nih.gov/pubmed/?term=Wiem%20T%5BAuthor%5D&cauthor=true&cauthor_uid=30608963), R. [Jeridi](https://www.ncbi.nlm.nih.gov/pubmed/?term=Jeridi%20R%5BAuthor%5D&cauthor=true&cauthor_uid=30608963), D. [Sheehan](https://www.ncbi.nlm.nih.gov/pubmed/?term=Sheehan%20D%5BAuthor%5D&cauthor=true&cauthor_uid=30608963), and A. [Landouls](https://www.ncbi.nlm.nih.gov/pubmed/?term=Landouls%20A%5BAuthor%5D&cauthor=true&cauthor_uid=30608963). 2019. Biochemical and biomolecular effects induced by a static magnetic field in Saccharomyces cerevisiae: Evidence for oxidative stress. [*PLoS One*](https://www.ncbi.nlm.nih.gov/pubmed/30608963) 14:e0209843.

[Koylu, H](http://www.ncbi.nlm.nih.gov/entrez/query.fcgi?db=pubmed&cmd=Search&itool=pubmed_AbstractPlus&term=%22Koylu+H%22%5BAuthor%5D)., H. [Mollaoglu](http://www.ncbi.nlm.nih.gov/entrez/query.fcgi?db=pubmed&cmd=Search&itool=pubmed_AbstractPlus&term=%22Mollaoglu+H%22%5BAuthor%5D), F. [Ozguner](http://www.ncbi.nlm.nih.gov/entrez/query.fcgi?db=pubmed&cmd=Search&itool=pubmed_AbstractPlus&term=%22Ozguner+F%22%5BAuthor%5D), M. [Nazyroglu](http://www.ncbi.nlm.nih.gov/entrez/query.fcgi?db=pubmed&cmd=Search&itool=pubmed_AbstractPlus&term=%22Nazyroglu+M%22%5BAuthor%5D), and N. [Delibab N](http://www.ncbi.nlm.nih.gov/entrez/query.fcgi?db=pubmed&cmd=Search&itool=pubmed_AbstractPlus&term=%22Delibab+N%22%5BAuthor%5D). 2006. Melatonin modulates 900 Mhz microwave-induced lipid peroxidation changes in rat brain. [*Toxicol. Ind. Health*](javascript:AL_get(this,%20'jour',%20'Toxicol%20Ind%20Health.');) 22:211-6.

Kubinyi, G., Z. Zeitler, G. Thuróczy, P. Juhász, J. Bakos, H. Sinay, and J. László. 2010. [Effects of homogeneous and inhomogeneous static magnetic fields combined with gamma radiation on DNA and DNA repair.](https://pubmed.ncbi.nlm.nih.gov/20564169/) *Bioelectromagnetics* 31:488-94.

Kumar, S., J.P. Nirala, J. Behari, and R. Paulraj. 2014. Effect of electromagnetic irradiation produced by 3G mobile phone on male rat reproductive system in a simulated scenario. *Indian J. Exp. Biol* 52:890-7.

[Lai, H](http://www.ncbi.nlm.nih.gov/pubmed?term=%22Lai%20H%22%5BAuthor%5D)., and N.P. [Singh](http://www.ncbi.nlm.nih.gov/pubmed?term=%22Singh%20NP%22%5BAuthor%5D). 1997. Melatonin and N-tert-butyl-alpha-phenylnitrone block 60-Hz magnetic field-induced DNA single and double strand breaks in rat brain cells. [*J. Pineal Res*](javascript:AL_get(this,%20'jour',%20'J%20Pineal%20%0d%0aRes.');) 22:152-62.

[Lai, H](http://www.ncbi.nlm.nih.gov/pubmed?term=%22Lai%20H%22%5BAuthor%5D)., and N.P. [Singh](http://www.ncbi.nlm.nih.gov/pubmed?term=%22Singh%20NP%22%5BAuthor%5D). 2004. Magnetic-field-induced DNA strand breaks in brain cells of the rat. [*Environ. Health Perspect*](javascript:AL_get(this,%20'jour',%20'Environ%20%0d%0aHealth%20Perspect.');) 112:687-94.

[Li, R](https://www.ncbi.nlm.nih.gov/pubmed/?term=Li%20R%5BAuthor%5D&cauthor=true&cauthor_uid=29996120)., M. [Ma, L.](https://www.ncbi.nlm.nih.gov/pubmed/?term=Ma%20M%5BAuthor%5D&cauthor=true&cauthor_uid=29996120) [Li, L](https://www.ncbi.nlm.nih.gov/pubmed/?term=Li%20L%5BAuthor%5D&cauthor=true&cauthor_uid=29996120). [Zhao](https://www.ncbi.nlm.nih.gov/pubmed/?term=Zhao%20L%5BAuthor%5D&cauthor=true&cauthor_uid=29996120), T. [Zhang](https://www.ncbi.nlm.nih.gov/pubmed/?term=Zhang%20T%5BAuthor%5D&cauthor=true&cauthor_uid=29996120), X. [Gao](https://www.ncbi.nlm.nih.gov/pubmed/?term=Gao%20X%5BAuthor%5D&cauthor=true&cauthor_uid=29996120), D. [Zhang](https://www.ncbi.nlm.nih.gov/pubmed/?term=Zhang%20D%5BAuthor%5D&cauthor=true&cauthor_uid=29996120), Y. [Zhu](https://www.ncbi.nlm.nih.gov/pubmed/?term=Zhu%20Y%5BAuthor%5D&cauthor=true&cauthor_uid=29996120), Q. [Peng](https://www.ncbi.nlm.nih.gov/pubmed/?term=Peng%20Q%5BAuthor%5D&cauthor=true&cauthor_uid=29996120), X. [Luo](https://www.ncbi.nlm.nih.gov/pubmed/?term=Luo%20X%5BAuthor%5D&cauthor=true&cauthor_uid=29996120), and M. [Wang](https://www.ncbi.nlm.nih.gov/pubmed/?term=Wang%20M%5BAuthor%5D&cauthor=true&cauthor_uid=29996120). 2018. The protective effect of autophagy on DNA damage in mouse spermatocyte-derived cells exposed to 1800 MHz radiofrequency electromagnetic fields. [*Cell. Physiol. Biochem*](https://www.ncbi.nlm.nih.gov/pubmed/29996120) 48:29-41.

[Lian, H.Y](https://www.ncbi.nlm.nih.gov/pubmed/?term=Lian%20HY%5BAuthor%5D&cauthor=true&cauthor_uid=29214607)., K.W. [Lin](https://www.ncbi.nlm.nih.gov/pubmed/?term=Lin%20KW%5BAuthor%5D&cauthor=true&cauthor_uid=29214607), C. [Yang](https://www.ncbi.nlm.nih.gov/pubmed/?term=Yang%20C%5BAuthor%5D&cauthor=true&cauthor_uid=29214607), and P. [Cai](https://www.ncbi.nlm.nih.gov/pubmed/?term=Cai%20P%5BAuthor%5D&cauthor=true&cauthor_uid=29214607). 2018. Generation and propagation of yeast prion [URE3] are elevated under electromagnetic field. [*Cell Stress Chaperones*](https://www.ncbi.nlm.nih.gov/pubmed/29214607) 23:581-94.

Liu, C., W. Duan, S. Xu, C. Chen, M. He, L. Zhang, Z. Yu, and Z. Zhou. 2013a. Exposure to 1800 MHz radiofrequency electromagnetic radiation induces oxidative DNA base damage in a mouse spermatocyte-derived cell line. *Toxicol. Lett* 218:2-9.

[Liu, C](http://www.ncbi.nlm.nih.gov/pubmed?term=Liu%20C%5BAuthor%5D&cauthor=true&cauthor_uid=23952262)., P. [Gao](http://www.ncbi.nlm.nih.gov/pubmed?term=Gao%20P%5BAuthor%5D&cauthor=true&cauthor_uid=23952262), S.C. [Xu](http://www.ncbi.nlm.nih.gov/pubmed?term=Xu%20SC%5BAuthor%5D&cauthor=true&cauthor_uid=23952262), Y. [Wang](http://www.ncbi.nlm.nih.gov/pubmed?term=Wang%20Y%5BAuthor%5D&cauthor=true&cauthor_uid=23952262), C.H. [Chen](http://www.ncbi.nlm.nih.gov/pubmed?term=Chen%20CH%5BAuthor%5D&cauthor=true&cauthor_uid=23952262), M.D. [He](http://www.ncbi.nlm.nih.gov/pubmed?term=He%20MD%5BAuthor%5D&cauthor=true&cauthor_uid=23952262), Z.P. [Yu](http://www.ncbi.nlm.nih.gov/pubmed?term=Yu%20ZP%5BAuthor%5D&cauthor=true&cauthor_uid=23952262), L. [Zhang](http://www.ncbi.nlm.nih.gov/pubmed?term=Zhang%20L%5BAuthor%5D&cauthor=true&cauthor_uid=23952262), and Z. [Zhou](http://www.ncbi.nlm.nih.gov/pubmed?term=Zhou%20Z%5BAuthor%5D&cauthor=true&cauthor_uid=23952262). 2013b. Mobile phone radiation induces mode-dependent DNA damage in a mouse spermatocyte-derived cell line: a protective role of melatonin. [*Int. J. Radiat. Biol*](http://www.ncbi.nlm.nih.gov/pubmed/23952262) 89:993-1001.

Lourencini da Silva, R., F. Albano, L.R. Lopes dos Santos, A.D. Tavares Jr, and I. Felzenszwalb. 2000. The effect of electromagnetic field exposure on the formation of DNA lesions. *Redox Rep* 5:299-301.

[Luo](https://pubmed.ncbi.nlm.nih.gov/?sort=date&term=Luo+Q&cauthor_id=16855210), [Q](https://pubmed.ncbi.nlm.nih.gov/16855210/#affiliation-1)., J. [Yang](https://pubmed.ncbi.nlm.nih.gov/?sort=date&term=Yang+J&cauthor_id=16855210), Q-L. Zeng,  X-M. Zhu,  Y-L. Qian, and H-F. [Huang](https://pubmed.ncbi.nlm.nih.gov/?sort=date&term=Huang+HF&cauthor_id=16855210). 2006. 50-Hertz electromagnetic fields induce gammaH2AX foci formation in mouse preimplantation embryos in vitro. *Biol. Reprod* 75:673-80.

[Luukkonen, J](http://www.ncbi.nlm.nih.gov/sites/entrez?Db=pubmed&Cmd=Search&Term=%22Luukkonen%20J%22%5BAuthor%5D&itool=EntrezSystem2.PEntrez.Pubmed.Pubmed_ResultsPanel.Pubmed_DiscoveryPanel.Pubmed_RVAbstractPlus)., P. [Hakulinen](http://www.ncbi.nlm.nih.gov/sites/entrez?Db=pubmed&Cmd=Search&Term=%22Hakulinen%20P%22%5BAuthor%5D&itool=EntrezSystem2.PEntrez.Pubmed.Pubmed_ResultsPanel.Pubmed_DiscoveryPanel.Pubmed_RVAbstractPlus), J. [Mäki-Paakkanen, J](http://www.ncbi.nlm.nih.gov/sites/entrez?Db=pubmed&Cmd=Search&Term=%22M%C3%A4ki-Paakkanen%20J%22%5BAuthor%5D&itool=EntrezSystem2.PEntrez.Pubmed.Pubmed_ResultsPanel.Pubmed_DiscoveryPanel.Pubmed_RVAbstractPlus). [Juutilainen, and J](http://www.ncbi.nlm.nih.gov/sites/entrez?Db=pubmed&Cmd=Search&Term=%22Juutilainen%20J%22%5BAuthor%5D&itool=EntrezSystem2.PEntrez.Pubmed.Pubmed_ResultsPanel.Pubmed_DiscoveryPanel.Pubmed_RVAbstractPlus). [Naarala](http://www.ncbi.nlm.nih.gov/sites/entrez?Db=pubmed&Cmd=Search&Term=%22Naarala%20J%22%5BAuthor%5D&itool=EntrezSystem2.PEntrez.Pubmed.Pubmed_ResultsPanel.Pubmed_DiscoveryPanel.Pubmed_RVAbstractPlus). 2009. Enhancement of chemically induced reactive oxygen species production and DNA damage in human SH-SY5Y neuroblastoma cells by 872MHz radiofrequency radiation. [*Mutat. Res*](javascript:AL_get(this,%20'jour',%20'Mutat%20Res.');) 662:54-8.

[Luukkonen, J](http://www.ncbi.nlm.nih.gov/pubmed?term=Luukkonen%20J%5BAuthor%5D&cauthor=true&cauthor_uid=24374227)., A. [Liimatainen](http://www.ncbi.nlm.nih.gov/pubmed?term=Liimatainen%20A%5BAuthor%5D&cauthor=true&cauthor_uid=24374227), J. [Juutilainen, J](http://www.ncbi.nlm.nih.gov/pubmed?term=Juutilainen%20J%5BAuthor%5D&cauthor=true&cauthor_uid=24374227). [Naarala](http://www.ncbi.nlm.nih.gov/pubmed?term=Naarala%20J%5BAuthor%5D&cauthor=true&cauthor_uid=24374227). 2014. Induction of genomic instability, oxidative processes, and mitochondrial activity by 50 Hz magnetic fields in human SH-SY5Y neuroblastoma cells. [*Mutat. Res*](http://www.ncbi.nlm.nih.gov/pubmed/24374227) 760:33-41.

[Maaroufi, K](http://www.ncbi.nlm.nih.gov/pubmed?term=%22Maaroufi%20K%22%5BAuthor%5D)., E. [Save](http://www.ncbi.nlm.nih.gov/pubmed?term=%22Save%20E%22%5BAuthor%5D), B. [Poucet](http://www.ncbi.nlm.nih.gov/pubmed?term=%22Poucet%20B%22%5BAuthor%5D), M. [Sakly](http://www.ncbi.nlm.nih.gov/pubmed?term=%22Sakly%20M%22%5BAuthor%5D), H. [Abdelmelek](http://www.ncbi.nlm.nih.gov/pubmed?term=%22Abdelmelek%20H%22%5BAuthor%5D) and L. [Had-Aissouni](http://www.ncbi.nlm.nih.gov/pubmed?term=%22Had-Aissouni%20L%22%5BAuthor%5D). 2011. Oxidative stress and prevention of the adaptive response to chronic iron overload in the brain of young adult rats exposed to a 150 kilohertz electromagnetic field. [*Neuroscience*](http://www.ncbi.nlm.nih.gov/pubmed/21497179##) 186:39-47.

[Mailankot, M](http://www.ncbi.nlm.nih.gov/pubmed?term=%22Mailankot%20M%22%5BAuthor%5D)., A.P. [Kunnath](http://www.ncbi.nlm.nih.gov/pubmed?term=%22Kunnath%20AP%22%5BAuthor%5D), H. [Jayalekshmi](http://www.ncbi.nlm.nih.gov/pubmed?term=%22Jayalekshmi%20H%22%5BAuthor%5D), B. [Koduru](http://www.ncbi.nlm.nih.gov/pubmed?term=%22Koduru%20B%22%5BAuthor%5D), and R. [Valsalan](http://www.ncbi.nlm.nih.gov/pubmed?term=%22Valsalan%20R%22%5BAuthor%5D). 2009. Radio frequency electromagnetic radiation (RF-EMR) from GSM (0.9/1.8GHz) mobile phones induces oxidative stress and reduces sperm motility in rats. [*Clinics (Sao Paulo)*](http://www.ncbi.nlm.nih.gov/pubmed/19578660##) 64:561-5.

[Maliszewska, J](https://www.ncbi.nlm.nih.gov/pubmed/?term=Maliszewska%20J%5BAuthor%5D&cauthor=true&cauthor_uid=29721708)., P. [Marciniak](https://www.ncbi.nlm.nih.gov/pubmed/?term=Marciniak%20P%5BAuthor%5D&cauthor=true&cauthor_uid=29721708), H. [Kletkiewicz](https://www.ncbi.nlm.nih.gov/pubmed/?term=Kletkiewicz%20H%5BAuthor%5D&cauthor=true&cauthor_uid=29721708), J. [Wyszkowska](https://www.ncbi.nlm.nih.gov/pubmed/?term=Wyszkowska%20J%5BAuthor%5D&cauthor=true&cauthor_uid=29721708), A. [Nowakowska](https://www.ncbi.nlm.nih.gov/pubmed/?term=Nowakowska%20A%5BAuthor%5D&cauthor=true&cauthor_uid=29721708), J. [Rogalska](https://www.ncbi.nlm.nih.gov/pubmed/?term=Rogalska%20J%5BAuthor%5D&cauthor=true&cauthor_uid=29721708). 2018. Electromagnetic field exposure (50 Hz) impairs response to noxious heat in American cockroach. [*J. Comp. Physiol. A Neuroethol. Sens. Neural Behav. Physiol*](https://www.ncbi.nlm.nih.gov/pubmed/29721708) 204:605-11.

[Mariucci, G](http://www.ncbi.nlm.nih.gov/pubmed?term=Mariucci%20G%5BAuthor%5D&cauthor=true&cauthor_uid=20569191)., M. [Villarini, M](http://www.ncbi.nlm.nih.gov/pubmed?term=Villarini%20M%5BAuthor%5D&cauthor=true&cauthor_uid=20569191). [Moretti](http://www.ncbi.nlm.nih.gov/pubmed?term=Moretti%20M%5BAuthor%5D&cauthor=true&cauthor_uid=20569191), E. [Taha](http://www.ncbi.nlm.nih.gov/pubmed?term=Taha%20E%5BAuthor%5D&cauthor=true&cauthor_uid=20569191), C. [Conte](http://www.ncbi.nlm.nih.gov/pubmed?term=Conte%20C%5BAuthor%5D&cauthor=true&cauthor_uid=20569191), A. [Minelli](http://www.ncbi.nlm.nih.gov/pubmed?term=Minelli%20A%5BAuthor%5D&cauthor=true&cauthor_uid=20569191), C. [Aristei](http://www.ncbi.nlm.nih.gov/pubmed?term=Aristei%20C%5BAuthor%5D&cauthor=true&cauthor_uid=20569191), and M.V. [Ambrosini](http://www.ncbi.nlm.nih.gov/pubmed?term=Ambrosini%20MV%5BAuthor%5D&cauthor=true&cauthor_uid=20569191). 2010. Brain DNA damage and 70-kDa heat shock protein expression in CD1 mice exposed to extremely low frequency magnetic fields. [*Int. J. Radiat. Biol*](http://www.ncbi.nlm.nih.gov/pubmed/20569191) 86:701-10.

[Marjanovic Cermak, A.M](https://www.ncbi.nlm.nih.gov/pubmed/?term=Marjanovic%20Cermak%20AM%5BAuthor%5D&cauthor=true&cauthor_uid=28836500)., I. [Pavicic](https://www.ncbi.nlm.nih.gov/pubmed/?term=Pavicic%20I%5BAuthor%5D&cauthor=true&cauthor_uid=28836500), B. [Tariba Lovakovic](https://www.ncbi.nlm.nih.gov/pubmed/?term=Tariba%20Lovakovic%20B%5BAuthor%5D&cauthor=true&cauthor_uid=28836500), A. [Pizent](https://www.ncbi.nlm.nih.gov/pubmed/?term=Pizent%20A%5BAuthor%5D&cauthor=true&cauthor_uid=28836500), and I. [Trosic](https://www.ncbi.nlm.nih.gov/pubmed/?term=Trosic%20I%5BAuthor%5D&cauthor=true&cauthor_uid=28836500). 2017. In vitro non-thermal oxidative stress response after 1800 MHz radiofrequency radiation. [*Gen. Physiol. Biophys*](https://www.ncbi.nlm.nih.gov/pubmed/28836500) 36:407-14.

[Martínez-Sámano, J](https://www.ncbi.nlm.nih.gov/pubmed/?term=Mart%C3%ADnez-S%C3%A1mano%20J%5BAuthor%5D&cauthor=true&cauthor_uid=29783956)., A. [Flores-Poblano](https://www.ncbi.nlm.nih.gov/pubmed/?term=Flores-Poblano%20A%5BAuthor%5D&cauthor=true&cauthor_uid=29783956), L. [Verdugo-Díaz](https://www.ncbi.nlm.nih.gov/pubmed/?term=Verdugo-D%C3%ADaz%20L%5BAuthor%5D&cauthor=true&cauthor_uid=29783956), M.A. [Juárez-Oropeza](https://www.ncbi.nlm.nih.gov/pubmed/?term=Ju%C3%A1rez-Oropeza%20MA%5BAuthor%5D&cauthor=true&cauthor_uid=29783956), and P.V. [Torres-Durán](https://www.ncbi.nlm.nih.gov/pubmed/?term=Torres-Dur%C3%A1n%20PV%5BAuthor%5D&cauthor=true&cauthor_uid=29783956). 2018. Extremely low frequency electromagnetic field exposure and restraint stress induce changes on the brain lipid profile of Wistar rats. [*BMC Neurosci*](https://www.ncbi.nlm.nih.gov/pubmed/29783956) 19:31.

[Masoumi, A](https://www.ncbi.nlm.nih.gov/pubmed/?term=Masoumi%20A%5BAuthor%5D&cauthor=true&cauthor_uid=29913098)., N. [Karbalaei](https://www.ncbi.nlm.nih.gov/pubmed/?term=Karbalaei%20N%5BAuthor%5D&cauthor=true&cauthor_uid=29913098), S.M.J. [Mortazavi](https://www.ncbi.nlm.nih.gov/pubmed/?term=Mortazavi%20SMJ%5BAuthor%5D&cauthor=true&cauthor_uid=29913098), and M. [Shabani](https://www.ncbi.nlm.nih.gov/pubmed/?term=Shabani%20M%5BAuthor%5D&cauthor=true&cauthor_uid=29913098). 2018. Radiofrequency radiation emitted from Wi-Fi (2.4 GHz) causes impaired insulin secretion and increased oxidative stress in rat pancreatic islets. [*Int. J. Radiat. Biol*](https://www.ncbi.nlm.nih.gov/pubmed/29913098) 94:850-7.

[Meena, R](http://www.ncbi.nlm.nih.gov/pubmed?term=Meena%20R%5BAuthor%5D&cauthor=true&cauthor_uid=23676079)., K. [Kumari](http://www.ncbi.nlm.nih.gov/pubmed?term=Kumari%20K%5BAuthor%5D&cauthor=true&cauthor_uid=23676079), J. [Kumar](http://www.ncbi.nlm.nih.gov/pubmed?term=Kumar%20J%5BAuthor%5D&cauthor=true&cauthor_uid=23676079), P. [Rajamani](http://www.ncbi.nlm.nih.gov/pubmed?term=Rajamani%20P%5BAuthor%5D&cauthor=true&cauthor_uid=23676079), H.N. [Verma](http://www.ncbi.nlm.nih.gov/pubmed?term=Verma%20HN%5BAuthor%5D&cauthor=true&cauthor_uid=23676079), and K.K. [Kesari](http://www.ncbi.nlm.nih.gov/pubmed?term=Kesari%20KK%5BAuthor%5D&cauthor=true&cauthor_uid=23676079). 2014. Therapeutic approaches of melatonin in microwave radiations-induced oxidative stress-mediated toxicity on male fertility pattern of Wistar rats. [*Electromagn. Biol. Med*](http://www.ncbi.nlm.nih.gov/pubmed/23676079) 33:81-91.

[Motawi, T.K](http://www.ncbi.nlm.nih.gov/pubmed?term=Motawi%20TK%5BAuthor%5D&cauthor=true&cauthor_uid=24801773)., H.A. [Darwish](http://www.ncbi.nlm.nih.gov/pubmed?term=Darwish%20HA%5BAuthor%5D&cauthor=true&cauthor_uid=24801773), Y.M. [Moustafa](http://www.ncbi.nlm.nih.gov/pubmed?term=Moustafa%20YM%5BAuthor%5D&cauthor=true&cauthor_uid=24801773), and M.M. [Labib](http://www.ncbi.nlm.nih.gov/pubmed?term=Labib%20MM%5BAuthor%5D&cauthor=true&cauthor_uid=24801773). 2014. Biochemical modifications and neuronal damage in brain of young and adult rats after long-term exposure to mobile phone radiations. [*Cell. Biochem. Biophys*](http://www.ncbi.nlm.nih.gov/pubmed/24801773) 70:845-55.

Moustafa, Y.M., R.M. Moustafa, A. Belacy, S.H. Abou-El-Ela, and F.M. Ali. 2001. Effects of acute exposure to the radiofrequency fields of cellular phones on plasma lipid peroxide and antioxidase activities in human erythrocytes. *J. Pharm. Biomed. Anal* 26:605-8.

[Nazıroğlu, M](http://www.ncbi.nlm.nih.gov/pubmed?term=Naz%C4%B1ro%C4%9Flu%20M%5BAuthor%5D&cauthor=true&cauthor_uid=22489926)., B. [Ciğ](http://www.ncbi.nlm.nih.gov/pubmed?term=Ci%C4%9F%20B%5BAuthor%5D&cauthor=true&cauthor_uid=22489926), S. [Doğan](http://www.ncbi.nlm.nih.gov/pubmed?term=Do%C4%9Fan%20S%5BAuthor%5D&cauthor=true&cauthor_uid=22489926), A.C. [Uğuz](http://www.ncbi.nlm.nih.gov/pubmed?term=U%C4%9Fuz%20AC%5BAuthor%5D&cauthor=true&cauthor_uid=22489926), S. [Dilek](http://www.ncbi.nlm.nih.gov/pubmed?term=Dilek%20S%5BAuthor%5D&cauthor=true&cauthor_uid=22489926), and D. [Faouzi](http://www.ncbi.nlm.nih.gov/pubmed?term=Faouzi%20D%5BAuthor%5D&cauthor=true&cauthor_uid=22489926). 2012. 2.45-Gz wireless devices induce oxidative stress and proliferation through cytosolic Ca²⁺ influx in human leukemia cancer cells. [*Int. J. Radiat. Biol.*](http://www.ncbi.nlm.nih.gov/pubmed/22489926) 88:449-56.

[Nikolova](https://pubmed.ncbi.nlm.nih.gov/?sort=date&term=Nikolova+T&cauthor_id=16116041), [T](https://pubmed.ncbi.nlm.nih.gov/16116041/#affiliation-1)., J. [Czyz](https://pubmed.ncbi.nlm.nih.gov/?sort=date&term=Czyz+J&cauthor_id=16116041), A. [Rolletschek](https://pubmed.ncbi.nlm.nih.gov/?sort=date&term=Rolletschek+A&cauthor_id=16116041), P. [Blyszczuk](https://pubmed.ncbi.nlm.nih.gov/?sort=date&term=Blyszczuk+P&cauthor_id=16116041), J. [Fuchs](https://pubmed.ncbi.nlm.nih.gov/?sort=date&term=Fuchs+J&cauthor_id=16116041), G. [Jovtchev](https://pubmed.ncbi.nlm.nih.gov/?sort=date&term=Jovtchev+G&cauthor_id=16116041), J. [Schuderer](https://pubmed.ncbi.nlm.nih.gov/?sort=date&term=Schuderer+J&cauthor_id=16116041), N. [Kuster](https://pubmed.ncbi.nlm.nih.gov/?sort=date&term=Kuster+N&cauthor_id=16116041), and A.M. [Wobus](https://pubmed.ncbi.nlm.nih.gov/?sort=date&term=Wobus+AM&cauthor_id=16116041). 2005. Electromagnetic fields affect transcript levels of apoptosis-related genes in embryonic stem cell-derived neural progenitor cells. *FASEB J* 19:1686-8.

Nirwane, A., V. Sridhar, and A. Majumdar. 2016. Neurobehavioural changes and brain oxidative stress induced by acute exposure to GSM900 mobile phone radiations in Zebrafish (Danio rerio). *Toxicol. Res* 32:123-32.

[Oksay, T](http://www.ncbi.nlm.nih.gov/pubmed?term=Oksay%20T%5BAuthor%5D&cauthor=true&cauthor_uid=23145464)., M. [Naziroğlu](http://www.ncbi.nlm.nih.gov/pubmed?term=Naziro%C4%9Flu%20M%5BAuthor%5D&cauthor=true&cauthor_uid=23145464), S. [Doğan](http://www.ncbi.nlm.nih.gov/pubmed?term=Do%C4%9Fan%20S%5BAuthor%5D&cauthor=true&cauthor_uid=23145464), A. [Güzel](http://www.ncbi.nlm.nih.gov/pubmed?term=G%C3%BCzel%20A%5BAuthor%5D&cauthor=true&cauthor_uid=23145464), N. [Gümral](http://www.ncbi.nlm.nih.gov/pubmed?term=G%C3%BCmral%20N%5BAuthor%5D&cauthor=true&cauthor_uid=23145464), and P.A. [Koşar](http://www.ncbi.nlm.nih.gov/pubmed?term=Ko%C5%9Far%20PA%5BAuthor%5D&cauthor=true&cauthor_uid=23145464). 2014. Protective effects of melatonin against oxidative injury in rat testis induced by wireless (2.45 GHz) devices. [*Andrologia*](http://www.ncbi.nlm.nih.gov/pubmed/23145464)46:65-72.

Oktem, F., F. Ozguner, H. Mollaoglu, A. Koyu, and E. Uz. 2005. Oxidative damage in the kidney induced by 900-MHz-emitted mobile phone: protection by melatonin. *Arch. Med. Res* 36:350-5.

[Oral, B](http://www.ncbi.nlm.nih.gov/entrez/query.fcgi?db=pubmed&cmd=Search&itool=pubmed_AbstractPlus&term=%22Oral+B%22%5BAuthor%5D)., M. [Guney](http://www.ncbi.nlm.nih.gov/entrez/query.fcgi?db=pubmed&cmd=Search&itool=pubmed_AbstractPlus&term=%22Guney+M%22%5BAuthor%5D), F. [Ozguner](http://www.ncbi.nlm.nih.gov/entrez/query.fcgi?db=pubmed&cmd=Search&itool=pubmed_AbstractPlus&term=%22Ozguner+F%22%5BAuthor%5D), N. [Karahan](http://www.ncbi.nlm.nih.gov/entrez/query.fcgi?db=pubmed&cmd=Search&itool=pubmed_AbstractPlus&term=%22Karahan+N%22%5BAuthor%5D), T. [Mungan](http://www.ncbi.nlm.nih.gov/entrez/query.fcgi?db=pubmed&cmd=Search&itool=pubmed_AbstractPlus&term=%22Mungan+T%22%5BAuthor%5D), S. [Comlekci](http://www.ncbi.nlm.nih.gov/entrez/query.fcgi?db=pubmed&cmd=Search&itool=pubmed_AbstractPlus&term=%22Comlekci+S%22%5BAuthor%5D), and G. [Cesur](http://www.ncbi.nlm.nih.gov/entrez/query.fcgi?db=pubmed&cmd=Search&itool=pubmed_AbstractPlus&term=%22Cesur+G%22%5BAuthor%5D). 2006. Endometrial apoptosis induced by a 900-MHz mobile phone: preventive effects of vitamins E and C. [*Adv. Ther*](javascript:AL_get(this,%20'jour',%20'Adv%20Ther.');) 23:957-73.

[Ozguner, F](http://www.ncbi.nlm.nih.gov/entrez/query.fcgi?db=pubmed&cmd=Search&term=%22Ozguner+F%22%5BAuthor%5D)., F. [Oktem](http://www.ncbi.nlm.nih.gov/entrez/query.fcgi?db=pubmed&cmd=Search&term=%22Oktem+F%22%5BAuthor%5D), A. [Ayata, A](http://www.ncbi.nlm.nih.gov/entrez/query.fcgi?db=pubmed&cmd=Search&term=%22Ayata+A%22%5BAuthor%5D). [Koyu](http://www.ncbi.nlm.nih.gov/entrez/query.fcgi?db=pubmed&cmd=Search&term=%22Koyu+A%22%5BAuthor%5D), and H.R. [Yilmaz](http://www.ncbi.nlm.nih.gov/entrez/query.fcgi?db=pubmed&cmd=Search&term=%22Yilmaz+HR%22%5BAuthor%5D). 2005a. A novel antioxidant agent caffeic acid phenethyl ester prevents long-term mobile phone exposure-induced renal impairment in rat. Prognostic value of malondialdehyde, N-acetyl-beta-D-glucosaminidase and nitric oxide determination. *Mol. Cell. Biochem* 277:73-80.

[Ozguner, F](http://www.ncbi.nlm.nih.gov/entrez/query.fcgi?db=pubmed&cmd=Search&term=%22Ozguner+F%22%5BAuthor%5D)., A. [Altinbas](http://www.ncbi.nlm.nih.gov/entrez/query.fcgi?db=pubmed&cmd=Search&term=%22Altinbas+A%22%5BAuthor%5D), M. [Ozaydin](http://www.ncbi.nlm.nih.gov/entrez/query.fcgi?db=pubmed&cmd=Search&term=%22Ozaydin+M%22%5BAuthor%5D), A. [Dogan](http://www.ncbi.nlm.nih.gov/entrez/query.fcgi?db=pubmed&cmd=Search&term=%22Dogan+A%22%5BAuthor%5D), H. [Vural](http://www.ncbi.nlm.nih.gov/entrez/query.fcgi?db=pubmed&cmd=Search&term=%22Vural+H%22%5BAuthor%5D), A.N. [Kisioglu](http://www.ncbi.nlm.nih.gov/entrez/query.fcgi?db=pubmed&cmd=Search&term=%22Kisioglu+AN%22%5BAuthor%5D), G. [Cesur, and N.G](http://www.ncbi.nlm.nih.gov/entrez/query.fcgi?db=pubmed&cmd=Search&term=%22Cesur+G%22%5BAuthor%5D). [Yildirim](http://www.ncbi.nlm.nih.gov/entrez/query.fcgi?db=pubmed&cmd=Search&term=%22Yildirim+NG%22%5BAuthor%5D). 2005b. Mobile phone-induced myocardial oxidative stress: protection by a novel antioxidant agent caffeic acid phenethyl ester. [*Toxicol. Ind. Health*](javascript:AL_get(this,%20'jour',%20'Toxicol%20Ind%20Health.');) 21:223-30.

[Ozguner, F](http://www.ncbi.nlm.nih.gov/entrez/query.fcgi?db=pubmed&cmd=Search&term=%22Ozguner+F%22%5BAuthor%5D)., Y. [Bardak](http://www.ncbi.nlm.nih.gov/entrez/query.fcgi?db=pubmed&cmd=Search&term=%22Bardak+Y%22%5BAuthor%5D), and S. [Comlekci](http://www.ncbi.nlm.nih.gov/entrez/query.fcgi?db=pubmed&cmd=Search&term=%22Comlekci+S%22%5BAuthor%5D). 2006. Protective effects of melatonin and caffeic acid phenethyl ester against retinal oxidative stress in long-term use of mobile phone: A comparative study. [*Mol. Cell. Biochem*](javascript:AL_get(this,%20'jour',%20'Mol%20Cell%20Biochem.');) 282:83-8.

[Ozorak, A](http://www.ncbi.nlm.nih.gov/pubmed?term=Ozorak%20A%5BAuthor%5D&cauthor=true&cauthor_uid=24101576)., M. [Nazıroğlu](http://www.ncbi.nlm.nih.gov/pubmed?term=Naz%C4%B1ro%C4%9Flu%20M%5BAuthor%5D&cauthor=true&cauthor_uid=24101576), O. [Celik](http://www.ncbi.nlm.nih.gov/pubmed?term=Celik%20O%5BAuthor%5D&cauthor=true&cauthor_uid=24101576), M. [Yüksel](http://www.ncbi.nlm.nih.gov/pubmed?term=Y%C3%BCksel%20M%5BAuthor%5D&cauthor=true&cauthor_uid=24101576), D. [Ozçelik](http://www.ncbi.nlm.nih.gov/pubmed?term=Oz%C3%A7elik%20D%5BAuthor%5D&cauthor=true&cauthor_uid=24101576), M.O. [Ozkaya](http://www.ncbi.nlm.nih.gov/pubmed?term=Ozkaya%20MO%5BAuthor%5D&cauthor=true&cauthor_uid=24101576), H. [Cetin](http://www.ncbi.nlm.nih.gov/pubmed?term=Cetin%20H%5BAuthor%5D&cauthor=true&cauthor_uid=24101576), M.C. [Kahya](http://www.ncbi.nlm.nih.gov/pubmed?term=Kahya%20MC%5BAuthor%5D&cauthor=true&cauthor_uid=24101576), and S.A. [Kose](http://www.ncbi.nlm.nih.gov/pubmed?term=Kose%20SA%5BAuthor%5D&cauthor=true&cauthor_uid=24101576). 2013. Wi-Fi (2.45 GHz)- and mobile phone (900 and 1800 MHz)-induced risks on oxidative stress and elements in kidney and testis of rats during pregnancy and the development of offspring. [*Biol. Trace Elem. Res*](http://www.ncbi.nlm.nih.gov/pubmed/24101576) 156:221-9.

[Özsobacı, N.P](https://www.ncbi.nlm.nih.gov/pubmed/?term=%C3%96zsobac%C4%B1%20NP%5BAuthor%5D&cauthor=true&cauthor_uid=31317470)., D.D. [Ergün](https://www.ncbi.nlm.nih.gov/pubmed/?term=Erg%C3%BCn%20DD%5BAuthor%5D&cauthor=true&cauthor_uid=31317470), M. [Tunçdemir](https://www.ncbi.nlm.nih.gov/pubmed/?term=Tun%C3%A7demir%20M%5BAuthor%5D&cauthor=true&cauthor_uid=31317470), and D. [Özçelik](https://www.ncbi.nlm.nih.gov/pubmed/?term=%C3%96z%C3%A7elik%20D%5BAuthor%5D&cauthor=true&cauthor_uid=31317470). 2020. Protective effects of zinc on 2.45 GHz electromagnetic radiation-induced oxidative stress and apoptosis in HEK293 cells. [*Biol. Trace Elem. Res*](https://www.ncbi.nlm.nih.gov/pubmed/31317470) 194:368-78.

[Pandey, N](https://www.ncbi.nlm.nih.gov/pubmed/?term=Pandey%20N%5BAuthor%5D&cauthor=true&cauthor_uid=27738269)., S. [Giri, S](https://www.ncbi.nlm.nih.gov/pubmed/?term=Giri%20S%5BAuthor%5D&cauthor=true&cauthor_uid=27738269). [Das](https://www.ncbi.nlm.nih.gov/pubmed/?term=Das%20S%5BAuthor%5D&cauthor=true&cauthor_uid=27738269), and P. [Upadhaya](https://www.ncbi.nlm.nih.gov/pubmed/?term=Upadhaya%20P%5BAuthor%5D&cauthor=true&cauthor_uid=27738269). 2017. Radiofrequency radiation (900 MHz)-induced DNA damage and cell cycle arrest in testicular germ cells in Swiss albino mice. [*Toxicol. Ind. Health*](https://www.ncbi.nlm.nih.gov/pubmed/27738269)33:373-84.

[Pandey, N](https://www.ncbi.nlm.nih.gov/pubmed/?term=Pandey%20N%5BAuthor%5D&cauthor=true&cauthor_uid=29562845)., and S. [Giri](https://www.ncbi.nlm.nih.gov/pubmed/?term=Giri%20S%5BAuthor%5D&cauthor=true&cauthor_uid=29562845). 2018. Melatonin attenuates radiofrequency radiation (900 MHz)-induced oxidative stress, DNA damage and cell cycle arrest in germ cells of male Swiss albino mice. [*Toxicol. Ind. Health*](https://www.ncbi.nlm.nih.gov/pubmed/29562845) 34:315-27.

Pandir, D., and R. Sahingoz. 2014. Magnetic field-induced oxidative stress and DNA damage in Mediterranean flour moth Ephestia kuehniella Zeller (Lepidoptera: Pyralidae) larvae. *J. Pest. Sci.* 87:79-87.

[Pastacı Özsobacı, N](https://www.ncbi.nlm.nih.gov/pubmed/?term=Pastac%C4%B1%20%C3%96zsobac%C4%B1%20N%5BAuthor%5D&cauthor=true&cauthor_uid=29685784)., D. [Düzgün Ergün](https://www.ncbi.nlm.nih.gov/pubmed/?term=D%C3%BCzg%C3%BCn%20Erg%C3%BCn%20D%5BAuthor%5D&cauthor=true&cauthor_uid=29685784), S. [Durmuş](https://www.ncbi.nlm.nih.gov/pubmed/?term=Durmu%C5%9F%20S%5BAuthor%5D&cauthor=true&cauthor_uid=29685784), M. [Tunçdemir](https://www.ncbi.nlm.nih.gov/pubmed/?term=Tun%C3%A7demir%20M%5BAuthor%5D&cauthor=true&cauthor_uid=29685784), H. [Uzun](https://www.ncbi.nlm.nih.gov/pubmed/?term=Uzun%20H%5BAuthor%5D&cauthor=true&cauthor_uid=29685784), R. [Gelişgen](https://www.ncbi.nlm.nih.gov/pubmed/?term=Geli%C5%9Fgen%20R%5BAuthor%5D&cauthor=true&cauthor_uid=29685784), and D. [Özçelik](https://www.ncbi.nlm.nih.gov/pubmed/?term=%C3%96z%C3%A7elik%20D%5BAuthor%5D&cauthor=true&cauthor_uid=29685784). 2018. Selenium supplementation ameliorates electromagnetic field-induced oxidative stress in the HEK293 cells. [*J. Trace Elem. Med. Biol*](https://www.ncbi.nlm.nih.gov/pubmed/29685784) 50:572-9.

[Politański, P](http://www.ncbi.nlm.nih.gov/pubmed?term=%22Polita%C5%84ski%20P%22%5BAuthor%5D)., E. [Rajkowska](http://www.ncbi.nlm.nih.gov/pubmed?term=%22Rajkowska%20E%22%5BAuthor%5D), M. [Pawlaczyk-Łuszczyńska](http://www.ncbi.nlm.nih.gov/pubmed?term=%22Pawlaczyk-%C5%81uszczy%C5%84ska%20M%22%5BAuthor%5D), A. [Dudarewicz, A](http://www.ncbi.nlm.nih.gov/pubmed?term=%22Dudarewicz%20A%22%5BAuthor%5D). [Wiktorek-Smagur](http://www.ncbi.nlm.nih.gov/pubmed?term=%22Wiktorek-Smagur%20A%22%5BAuthor%5D), M. [Sliwińska-Kowalska](http://www.ncbi.nlm.nih.gov/pubmed?term=%22Sliwi%C5%84ska-Kowalska%20M%22%5BAuthor%5D), and M. [Zmyślony](http://www.ncbi.nlm.nih.gov/pubmed?term=%22Zmy%C5%9Blony%20M%22%5BAuthor%5D). 2010. Static magnetic field affects oxidative stress in mouse cochlea. [*Int. J. Occup. Med. Environ. Health*](http://www.ncbi.nlm.nih.gov/pubmed/21306983##) 23:377-84.

[Rageh, M.M](http://www.ncbi.nlm.nih.gov/pubmed?term=Rageh%20MM%5BAuthor%5D&cauthor=true&cauthor_uid=23091355)., R.H. [El-Gebaly](http://www.ncbi.nlm.nih.gov/pubmed?term=El-Gebaly%20RH%5BAuthor%5D&cauthor=true&cauthor_uid=23091355), and N.S. [El-Bialy](http://www.ncbi.nlm.nih.gov/pubmed?term=El-Bialy%20NS%5BAuthor%5D&cauthor=true&cauthor_uid=23091355). 2012. Assessment of genotoxic and cytotoxic hazards in brain and bone marrow cells of newborn rats exposed to extremely low-frequency magnetic field. [*J. Biomed. Biotechnol*](http://www.ncbi.nlm.nih.gov/pubmed/23091355) 2012:716023.

[Regoli, F](http://www.ncbi.nlm.nih.gov/pubmed?term=%22Regoli%20F%22%5BAuthor%5D)., S. [Gorbi](http://www.ncbi.nlm.nih.gov/pubmed?term=%22Gorbi%20S%22%5BAuthor%5D), N. [Machella](http://www.ncbi.nlm.nih.gov/pubmed?term=%22Machella%20N%22%5BAuthor%5D), S. [Tedesco](http://www.ncbi.nlm.nih.gov/pubmed?term=%22Tedesco%20S%22%5BAuthor%5D), M. [Benedetti](http://www.ncbi.nlm.nih.gov/pubmed?term=%22Benedetti%20M%22%5BAuthor%5D), R. [Bocchetti](http://www.ncbi.nlm.nih.gov/pubmed?term=%22Bocchetti%20R%22%5BAuthor%5D), A. [Notti](http://www.ncbi.nlm.nih.gov/pubmed?term=%22Notti%20A%22%5BAuthor%5D), D. [Fattorini](http://www.ncbi.nlm.nih.gov/pubmed?term=%22Fattorini%20D%22%5BAuthor%5D), F. [Piva](http://www.ncbi.nlm.nih.gov/pubmed?term=%22Piva%20F%22%5BAuthor%5D), and G. [Principato](http://www.ncbi.nlm.nih.gov/pubmed?term=%22Principato%20G%22%5BAuthor%5D). 2005. Pro-oxidant effects of extremely low frequency electromagnetic fields in the land snail Helix aspersa. [*Free Radic. Biol. Med*](javascript:AL_get(this,%20'jour',%20'Free%20Radic%0d%0a%20Biol%20Med.');) 39:1620-8.

[Sahebjamei, H](http://www.ncbi.nlm.nih.gov/pubmed?term=Sahebjamei%20H%5BAuthor%5D&cauthor=true&cauthor_uid=16988990)., P. [Abdolmaleki](http://www.ncbi.nlm.nih.gov/pubmed?term=Abdolmaleki%20P%5BAuthor%5D&cauthor=true&cauthor_uid=16988990), and F. [Ghanati](http://www.ncbi.nlm.nih.gov/pubmed?term=Ghanati%20F%5BAuthor%5D&cauthor=true&cauthor_uid=16988990). 2007. Effects of magnetic field on the antioxidant enzyme activities of suspension-cultured tobacco cells.[*Bioelectromagnetics*](http://www.ncbi.nlm.nih.gov/pubmed/16988990) 28:42-7.

[Şahin, D](http://www.ncbi.nlm.nih.gov/pubmed/?term=%C5%9Eahin%20D%5BAuthor%5D&cauthor=true&cauthor_uid=26775761)., E. [Özgür](http://www.ncbi.nlm.nih.gov/pubmed/?term=%C3%96zg%C3%BCr%20E%5BAuthor%5D&cauthor=true&cauthor_uid=26775761), G. [Güler](http://www.ncbi.nlm.nih.gov/pubmed/?term=G%C3%BCler%20G%5BAuthor%5D&cauthor=true&cauthor_uid=26775761), A. [Tomruk](http://www.ncbi.nlm.nih.gov/pubmed/?term=Tomruk%20A%5BAuthor%5D&cauthor=true&cauthor_uid=26775761), İ [Ünlü](http://www.ncbi.nlm.nih.gov/pubmed/?term=%C3%9Cnl%C3%BC%20%C4%B0%5BAuthor%5D&cauthor=true&cauthor_uid=26775761), A. [Sepici-Dinçel](http://www.ncbi.nlm.nih.gov/pubmed/?term=Sepici-Din%C3%A7el%20A%5BAuthor%5D&cauthor=true&cauthor_uid=26775761), and N. [Seyhan](http://www.ncbi.nlm.nih.gov/pubmed/?term=Seyhan%20N%5BAuthor%5D&cauthor=true&cauthor_uid=26775761). 2016. The 2100 MHz radiofrequency radiation of a 3G-mobile phone and the DNA oxidative damage in brain. [*J. Chem. Neuroanat*](http://www.ncbi.nlm.nih.gov/pubmed/26775761) 75(Pt B):94-8.

[Saikhedkar, N](http://www.ncbi.nlm.nih.gov/pubmed?term=Saikhedkar%20N%5BAuthor%5D&cauthor=true&cauthor_uid=24861496)., M. [Bhatnagar](http://www.ncbi.nlm.nih.gov/pubmed?term=Bhatnagar%20M%5BAuthor%5D&cauthor=true&cauthor_uid=24861496), A. [Jain](http://www.ncbi.nlm.nih.gov/pubmed?term=Jain%20A%5BAuthor%5D&cauthor=true&cauthor_uid=24861496), P. [Sukhwal](http://www.ncbi.nlm.nih.gov/pubmed?term=Sukhwal%20P%5BAuthor%5D&cauthor=true&cauthor_uid=24861496), C. [Sharma](http://www.ncbi.nlm.nih.gov/pubmed?term=Sharma%20C%5BAuthor%5D&cauthor=true&cauthor_uid=24861496), and N. [Jaiswal](http://www.ncbi.nlm.nih.gov/pubmed?term=Jaiswal%20N%5BAuthor%5D&cauthor=true&cauthor_uid=24861496). 2014. Effects of mobile phone radiation (900 MHz radiofrequency) on structure and functions of rat brain. [*Neurol. Res*](http://www.ncbi.nlm.nih.gov/pubmed/24861496) 36:1072-9.

Schmitz, C., E. Keller, T. Freuding, J. Silny, and H. Korr. 2004. 50-Hz magnetic field exposure

influences DNA repair and mitochondrial DNA synthesis of distinct cell types in

brain and kidney of adult mice. *Acta Neuropathol (Berl)* 107:257-64.

[Seif, F](https://www.ncbi.nlm.nih.gov/pubmed/?term=Seif%20F%5BAuthor%5D&cauthor=true&cauthor_uid=30496018)., M.R. [Bayatiani](https://www.ncbi.nlm.nih.gov/pubmed/?term=Bayatiani%20MR%5BAuthor%5D&cauthor=true&cauthor_uid=30496018), H. [Ansarihadipour](https://www.ncbi.nlm.nih.gov/pubmed/?term=Ansarihadipour%20H%5BAuthor%5D&cauthor=true&cauthor_uid=30496018), G. [Habibi](https://www.ncbi.nlm.nih.gov/pubmed/?term=Habibi%20G%5BAuthor%5D&cauthor=true&cauthor_uid=30496018), S. [Sadelaji](https://www.ncbi.nlm.nih.gov/pubmed/?term=Sadelaji%20S%5BAuthor%5D&cauthor=true&cauthor_uid=30496018). 2019. Protective properties of Myrtus communis extract against oxidative effects of extremely low-frequency magnetic fields on rat plasma and hemoglobin. [*Int. J. Radiat. Biol*](https://www.ncbi.nlm.nih.gov/pubmed/30496018) 95:215-24.

[Seifirad, S](http://www.ncbi.nlm.nih.gov/pubmed?term=Seifirad%20S%5BAuthor%5D&cauthor=true&cauthor_uid=25152870)., S. [Farzampour](http://www.ncbi.nlm.nih.gov/pubmed?term=Farzampour%20S%5BAuthor%5D&cauthor=true&cauthor_uid=25152870), M. [Nourbakhsh, M](http://www.ncbi.nlm.nih.gov/pubmed?term=Nourbakhsh%20M%5BAuthor%5D&cauthor=true&cauthor_uid=25152870).M. [Amoli, M](http://www.ncbi.nlm.nih.gov/pubmed?term=Amoli%20MM%5BAuthor%5D&cauthor=true&cauthor_uid=25152870). [Razzaghy-Azar](http://www.ncbi.nlm.nih.gov/pubmed?term=Razzaghy-Azar%20M%5BAuthor%5D&cauthor=true&cauthor_uid=25152870), and B. [Larijani.](http://www.ncbi.nlm.nih.gov/pubmed?term=Larijani%20B%5BAuthor%5D&cauthor=true&cauthor_uid=25152870)2014. Effects of extremely low frequency electromagnetic fields on paraoxonase serum activity and lipid peroxidation metabolites in rat. [J. *Diabetes Metab. Disord*](http://www.ncbi.nlm.nih.gov/pubmed/25152870) 13:85.

[Selaković, V](http://www.ncbi.nlm.nih.gov/pubmed?term=Selakovi%C4%87%20V%5BAuthor%5D&cauthor=true&cauthor_uid=23292355)., S. [Rauš Balind](http://www.ncbi.nlm.nih.gov/pubmed?term=Rau%C5%A1%20Balind%20S%5BAuthor%5D&cauthor=true&cauthor_uid=23292355), L. [Radenović](http://www.ncbi.nlm.nih.gov/pubmed?term=Radenovi%C4%87%20L%5BAuthor%5D&cauthor=true&cauthor_uid=23292355), Z. [Prolić](http://www.ncbi.nlm.nih.gov/pubmed?term=Proli%C4%87%20Z%5BAuthor%5D&cauthor=true&cauthor_uid=23292355), and B. [Janać](http://www.ncbi.nlm.nih.gov/pubmed?term=Jana%C4%87%20B%5BAuthor%5D&cauthor=true&cauthor_uid=23292355). 2013. Age-dependent effects of ELF-MF on oxidative stress in the brain of mongolian gerbils. [*Cell. Biochem. Biophys*](http://www.ncbi.nlm.nih.gov/pubmed/23292355) 66:513-21.

[Shabani](https://pubmed.ncbi.nlm.nih.gov/?sort=pubdate&term=Shabani+Z&cauthor_id=33794719),[Z](https://pubmed.ncbi.nlm.nih.gov/33794719/#affiliation-1).,  [D.M. Nejad](https://pubmed.ncbi.nlm.nih.gov/?sort=pubdate&term=Mohammad+Nejad+D&cauthor_id=33794719),  [T. Ghadiri](https://pubmed.ncbi.nlm.nih.gov/?sort=pubdate&term=Ghadiri+T&cauthor_id=33794719), and M. [Karimipour](https://pubmed.ncbi.nlm.nih.gov/?sort=pubdate&term=Karimipour+M&cauthor_id=33794719). 2021. Evaluation of the neuroprotective effects of Vitamin E on the rat substantia nigra neural cells exposed to electromagnetic field: An ultrastructural study. *Electromagn. Biol. Med* 40:428-37.

[Shahin, S](http://www.ncbi.nlm.nih.gov/pubmed/?term=Shahin%20S%5BAuthor%5D&cauthor=true&cauthor_uid=23334843)., V.P. [Singh](http://www.ncbi.nlm.nih.gov/pubmed/?term=Singh%20VP%5BAuthor%5D&cauthor=true&cauthor_uid=23334843), R.K. [Shukla](http://www.ncbi.nlm.nih.gov/pubmed/?term=Shukla%20RK%5BAuthor%5D&cauthor=true&cauthor_uid=23334843), A. [Dhawan](http://www.ncbi.nlm.nih.gov/pubmed/?term=Dhawan%20A%5BAuthor%5D&cauthor=true&cauthor_uid=23334843), R.K. [Gangwar](http://www.ncbi.nlm.nih.gov/pubmed/?term=Gangwar%20RK%5BAuthor%5D&cauthor=true&cauthor_uid=23334843), S.P. [Singh](http://www.ncbi.nlm.nih.gov/pubmed/?term=Singh%20SP%5BAuthor%5D&cauthor=true&cauthor_uid=23334843), and C.M. [Chaturvedi](http://www.ncbi.nlm.nih.gov/pubmed/?term=Chaturvedi%20CM%5BAuthor%5D&cauthor=true&cauthor_uid=23334843). 2013. 2.45 GHz microwave irradiation-induced oxidative stress affects implantation or pregnancy in mice, Mus musculus. [*Appl. Biochem. Biotechnol*](http://www.ncbi.nlm.nih.gov/pubmed/23334843) 169:1727-51.

[Shahin, S](https://www.ncbi.nlm.nih.gov/pubmed/?term=Shahin%20S%5BAuthor%5D&cauthor=true&cauthor_uid=28780396)., S.P. [Singh](https://www.ncbi.nlm.nih.gov/pubmed/?term=Singh%20SP%5BAuthor%5D&cauthor=true&cauthor_uid=28780396), and C.M. [Chaturvedi](https://www.ncbi.nlm.nih.gov/pubmed/?term=Chaturvedi%20CM%5BAuthor%5D&cauthor=true&cauthor_uid=28780396). 2017. Mobile phone (1800 MHz) radiation impairs female reproduction in mice, Mus musculus, through stress induced inhibition of ovarian and uterine activity. [*Reprod. Toxicol*](https://www.ncbi.nlm.nih.gov/pubmed/28780396) 73:41-60.

[Shahin](https://pubmed.ncbi.nlm.nih.gov/?sort=date&term=Shahin+NN&cauthor_id=30878504), [N.N](https://pubmed.ncbi.nlm.nih.gov/30878504/#affiliation-1)., N.A. [El-Nabarawy](https://pubmed.ncbi.nlm.nih.gov/?sort=date&term=El-Nabarawy+NA&cauthor_id=30878504), A.S. [Gouda](https://pubmed.ncbi.nlm.nih.gov/?sort=date&term=Gouda+AS&cauthor_id=30878504), and B. [Mégarbane](https://pubmed.ncbi.nlm.nih.gov/?sort=date&term=M%C3%A9garbane+B&cauthor_id=30878504). 2019. The protective role of spermine against male reproductive aberrations induced by exposure to electromagnetic field - An experimental investigation in the rat. *Toxicol. Appl. Pharmacol*  370:117-30.

[Sharma, S](https://www.ncbi.nlm.nih.gov/pubmed/?term=Sharma%20S%5BAuthor%5D&cauthor=true&cauthor_uid=32205214)., and S. [Shukla](https://www.ncbi.nlm.nih.gov/pubmed/?term=Shukla%20S%5BAuthor%5D&cauthor=true&cauthor_uid=32205214). 2020. Effect of electromagnetic radiation on redox status, acetylcholine esterase activity and cellular damage contributing to the diminution of the brain working memory in rats. [*J. Chem. Neuroanat*](https://www.ncbi.nlm.nih.gov/pubmed/32205214) 106:101784.

[Sharma](https://pubmed.ncbi.nlm.nih.gov/?sort=pubdate&term=Sharma+A&cauthor_id=33109858), A., S. [Shrivastava](https://pubmed.ncbi.nlm.nih.gov/?sort=pubdate&term=Shrivastava+S&cauthor_id=33109858), and S. [Shukla](https://pubmed.ncbi.nlm.nih.gov/?sort=pubdate&term=Shukla+S&cauthor_id=33109858).2020.Exposure of radiofrequency electromagnetic radiation on biochemical and pathological alterations. *Neurol. India* 68:1092-100.

[Sharma](https://pubmed.ncbi.nlm.nih.gov/?sort=pubdate&term=Sharma+A&cauthor_id=34404322),[A](https://pubmed.ncbi.nlm.nih.gov/34404322/#affiliation-1)., S. [Shrivastava](https://pubmed.ncbi.nlm.nih.gov/?sort=pubdate&term=Shrivastava+S&cauthor_id=34404322),  [and S. Shukla](https://pubmed.ncbi.nlm.nih.gov/?sort=pubdate&term=Shukla+S&cauthor_id=34404322). 2021. Oxidative damage in the liver and brain of the rats exposed to frequency-dependent radiofrequency electromagnetic exposure: Biochemical and histopathological evidence. *Free Radic. Res* 55:535-46.

[Singh, H.P](http://www.ncbi.nlm.nih.gov/pubmed?term=%22Singh%20HP%22%5BAuthor%5D)., V.P. [Sharma](http://www.ncbi.nlm.nih.gov/pubmed?term=%22Sharma%20VP%22%5BAuthor%5D), D.R. [Batish](http://www.ncbi.nlm.nih.gov/pubmed?term=%22Batish%20DR%22%5BAuthor%5D), and R.K. [Kohli](http://www.ncbi.nlm.nih.gov/pubmed?term=%22Kohli%20RK%22%5BAuthor%5D). 2012. Cell phone electromagnetic field radiations affect rhizogenesis through impairment of biochemical processes. [*Environ. Monit. Assess*](javascript:AL_get(this,%20'jour',%20'Environ%20Monit%20Assess.');)184:1813-21.

Singh, N., and H. Lai. 1998. 60 Hz magnetic field exposure induces DNA crosslinks in rat brain

cells. *Mutat. Res* 400:313-20.

Sokolovic, D., and B. Djordjevic. 2015. Oxidative stress parameters and DNA fragmentation in testicular tissue of rats exposed to microwave radiation. *Adv. Clin. Exp. Med* 24:429-36.

[Solek, P](https://www.ncbi.nlm.nih.gov/pubmed/?term=Solek%20P%5BAuthor%5D&cauthor=true&cauthor_uid=28323003)., L. [Majchrowicz](https://www.ncbi.nlm.nih.gov/pubmed/?term=Majchrowicz%20L%5BAuthor%5D&cauthor=true&cauthor_uid=28323003), D. [Bloniarz](https://www.ncbi.nlm.nih.gov/pubmed/?term=Bloniarz%20D%5BAuthor%5D&cauthor=true&cauthor_uid=28323003), E. [Krotoszynska](https://www.ncbi.nlm.nih.gov/pubmed/?term=Krotoszynska%20E%5BAuthor%5D&cauthor=true&cauthor_uid=28323003), and M. [Koziorowski](https://www.ncbi.nlm.nih.gov/pubmed/?term=Koziorowski%20M%5BAuthor%5D&cauthor=true&cauthor_uid=28323003). 2017. Pulsed or continuous electromagnetic field induce p53/p21-mediated apoptotic signaling pathway in mouse spermatogenic cells in vitro and thus may affect male fertility. [*Toxicology*](https://www.ncbi.nlm.nih.gov/pubmed/28323003) 382:84-92.

[Storch, K](https://www.ncbi.nlm.nih.gov/pubmed/?term=Storch%20K%5BAuthor%5D&cauthor=true&cauthor_uid=27959944)., E. [Dickreuter](https://www.ncbi.nlm.nih.gov/pubmed/?term=Dickreuter%20E%5BAuthor%5D&cauthor=true&cauthor_uid=27959944), A. [Artati](https://www.ncbi.nlm.nih.gov/pubmed/?term=Artati%20A%5BAuthor%5D&cauthor=true&cauthor_uid=27959944), J. [Adamski](https://www.ncbi.nlm.nih.gov/pubmed/?term=Adamski%20J%5BAuthor%5D&cauthor=true&cauthor_uid=27959944), and N. [Cordes.](https://www.ncbi.nlm.nih.gov/pubmed/?term=Cordes%20N%5BAuthor%5D&cauthor=true&cauthor_uid=27959944) 2016. BEMER electromagnetic field therapy reduces cancer cell radioresistance by enhanced ROS formation and Induced DNA damage. [*PLoS One.*](https://www.ncbi.nlm.nih.gov/pubmed/27959944) 11:e0167931.

Sun, R.G., W.F. Chen, H. Qi, K. Zhang, T. Bu, Y. Liu, and S.R. Wang. 2012. [Biologic effects of SMF and paclitaxel on K562 human leukemia cells.](https://pubmed.ncbi.nlm.nih.gov/22447825/)  *Gen. Physiol. Biophys* 31:1-10.

Sun, Y., L. Zong, Z. Gao, S. Zhu, J. Tong, and Y. Cao. 2017. Mitochondrial DNA damage and oxidative damage in HL-60 cells exposed to 900MHz radiofrequency fields. *Mutat. Res* 797-799:7-14.

Svedenstal, B.M., K.J. Johanson, and K.H. Mild. 1999. DNA damage induced in brain cells of

CBA mice exposed to magnetic fields. *In Vivo.* 13:551-2.

[Tayefi, H](http://www.ncbi.nlm.nih.gov/pubmed?term=Tayefi%20H%5BAuthor%5D&cauthor=true&cauthor_uid=22427754)., A. [Kiray](http://www.ncbi.nlm.nih.gov/pubmed?term=Kiray%20A%5BAuthor%5D&cauthor=true&cauthor_uid=22427754), M. [Kiray](http://www.ncbi.nlm.nih.gov/pubmed?term=Kiray%20M%5BAuthor%5D&cauthor=true&cauthor_uid=22427754), B.U. [Ergur BU](http://www.ncbi.nlm.nih.gov/pubmed?term=Ergur%20BU%5BAuthor%5D&cauthor=true&cauthor_uid=22427754), H.A. [Bagriyanik](http://www.ncbi.nlm.nih.gov/pubmed?term=Bagriyanik%20HA%5BAuthor%5D&cauthor=true&cauthor_uid=22427754), C. [Pekcetin](http://www.ncbi.nlm.nih.gov/pubmed?term=Pekcetin%20C%5BAuthor%5D&cauthor=true&cauthor_uid=22427754), M. [Fidan](http://www.ncbi.nlm.nih.gov/pubmed?term=Fidan%20M%5BAuthor%5D&cauthor=true&cauthor_uid=22427754), and C. [Ozogul](http://www.ncbi.nlm.nih.gov/pubmed?term=Ozogul%20C%5BAuthor%5D&cauthor=true&cauthor_uid=22427754). 2010. The effects of prenatal and neonatal exposure to electromagnetic fields on infant rat myocardium. [*Arch. Med. Sci*](http://www.ncbi.nlm.nih.gov/pubmed/22427754) 6:837-42.

[Tiwari, R](https://www.ncbi.nlm.nih.gov/pubmed/?term=Tiwari%20R%5BAuthor%5D&cauthor=true&cauthor_uid=24460415)., N.L. [Lakshmi](https://www.ncbi.nlm.nih.gov/pubmed/?term=Lakshmi%20NK%5BAuthor%5D&cauthor=true&cauthor_uid=24460415), S.C. [Bhargava](https://www.ncbi.nlm.nih.gov/pubmed/?term=Bhargava%20SC%5BAuthor%5D&cauthor=true&cauthor_uid=24460415), and Y.R. [Ahuja](https://www.ncbi.nlm.nih.gov/pubmed/?term=Ahuja%20YR%5BAuthor%5D&cauthor=true&cauthor_uid=24460415). 2015. Epinephrine, DNA integrity and oxidative stress in workers exposed to extremely low-frequency electromagnetic fields (ELF-EMFs) at 132 kV substations. [*Electromagn. Biol. Med*](https://www.ncbi.nlm.nih.gov/pubmed/24460415) 34:56-62.

[Tkalec, M](http://www.ncbi.nlm.nih.gov/pubmed?term=%22Tkalec%20M%22%5BAuthor%5D)., K. [Malarić](http://www.ncbi.nlm.nih.gov/pubmed?term=%22Malari%C4%87%20K%22%5BAuthor%5D), and B. [Pevalek-Kozlina](http://www.ncbi.nlm.nih.gov/pubmed?term=%22Pevalek-Kozlina%20B%22%5BAuthor%5D). 2007. Exposure to radiofrequency radiation induces oxidative stress in duckweed Lemna minor L. [*Sci. Total Environ*](http://www.ncbi.nlm.nih.gov/pubmed/17825879##) 388:78-89.

[Tkalec, M](http://www.ncbi.nlm.nih.gov/pubmed?term=Tkalec%20M%5BAuthor%5D&cauthor=true&cauthor_uid=23352129)., A. [Stambuk](http://www.ncbi.nlm.nih.gov/pubmed?term=Stambuk%20A%5BAuthor%5D&cauthor=true&cauthor_uid=23352129), M. [Srut](http://www.ncbi.nlm.nih.gov/pubmed?term=Srut%20M%5BAuthor%5D&cauthor=true&cauthor_uid=23352129), K. [Malarić](http://www.ncbi.nlm.nih.gov/pubmed?term=Malari%C4%87%20K%5BAuthor%5D&cauthor=true&cauthor_uid=23352129), and G.I. [Klobučar](http://www.ncbi.nlm.nih.gov/pubmed?term=Klobu%C4%8Dar%20GI%5BAuthor%5D&cauthor=true&cauthor_uid=23352129). 2013. Oxidative and genotoxic effects of 900 MHz electromagnetic fields in the earthworm Eisenia fetida. [*Ecotoxicol. Environ. Saf*](http://www.ncbi.nlm.nih.gov/pubmed/?term=23352129) 90:7-12.

Tök, L., M. Nazıroğlu, S. Doğan, M.C. Kahya, and O. Tök. 2014. Effects of melatonin on Wi-Fi-induced oxidative stress in lens of rats. *Indian J. Ophthalmol* 62:12-5.

[Tomruk, A](http://www.ncbi.nlm.nih.gov/pubmed?term=%22Tomruk%20A%22%5BAuthor%5D)., G. [Guler](http://www.ncbi.nlm.nih.gov/pubmed?term=%22Guler%20G%22%5BAuthor%5D), and A.S. [Dincel](http://www.ncbi.nlm.nih.gov/pubmed?term=%22Dincel%20AS%22%5BAuthor%5D). 2010. The influence of 1800 MHz GSM-like signals on hepatic oxidative DNA and lipid damage in nonpregnant, pregnant, and newly born rabbits. [*Cell. Biochem. Biophys*](http://www.ncbi.nlm.nih.gov/pubmed?term=tomruk%20and%20cell%20Biochem%20Biophys##)56:39-47.

[Türker, Y](http://www.ncbi.nlm.nih.gov/pubmed?term=T%C3%BCrker%20Y%5BAuthor%5D&cauthor=true&cauthor_uid=21360060)., M. [Nazıroğlu](http://www.ncbi.nlm.nih.gov/pubmed?term=Naz%C4%B1ro%C4%9Flu%20M%5BAuthor%5D&cauthor=true&cauthor_uid=21360060), N. [Gümral](http://www.ncbi.nlm.nih.gov/pubmed?term=G%C3%BCmral%20N%5BAuthor%5D&cauthor=true&cauthor_uid=21360060), O. [Celik](http://www.ncbi.nlm.nih.gov/pubmed?term=Celik%20O%5BAuthor%5D&cauthor=true&cauthor_uid=21360060), M. [Saygın](http://www.ncbi.nlm.nih.gov/pubmed?term=Sayg%C4%B1n%20M%5BAuthor%5D&cauthor=true&cauthor_uid=21360060), S. [Cömlekçi](http://www.ncbi.nlm.nih.gov/pubmed?term=C%C3%B6mlek%C3%A7i%20S%5BAuthor%5D&cauthor=true&cauthor_uid=21360060), and M. [Flores-Arce](http://www.ncbi.nlm.nih.gov/pubmed?term=Flores-Arce%20M%5BAuthor%5D&cauthor=true&cauthor_uid=21360060). 2011. Selenium and L-carnitine reduce oxidative stress in the heart of rat induced by 2.45-GHz radiation from wireless devices. [*Biol. Trace Elem. Res*](http://www.ncbi.nlm.nih.gov/pubmed/21360060) 143:1640-50.

[Vafaei](https://pubmed.ncbi.nlm.nih.gov/?sort=date&term=Vafaei+H&cauthor_id=32695301) [H.](https://pubmed.ncbi.nlm.nih.gov/32695301/#affiliation-1), [G. Kavari](https://pubmed.ncbi.nlm.nih.gov/?sort=date&term=Kavari+G&cauthor_id=32695301), [H.R. Izadi](https://pubmed.ncbi.nlm.nih.gov/?sort=date&term=Izadi+HR&cauthor_id=32695301), [Z. Z. Dorahi](https://pubmed.ncbi.nlm.nih.gov/?sort=date&term=Zare+Dorahi+Z&cauthor_id=32695301), [M. Dianatpour](https://pubmed.ncbi.nlm.nih.gov/?sort=date&term=Dianatpour+M&cauthor_id=32695301), [A. Daneshparvar](https://pubmed.ncbi.nlm.nih.gov/?sort=date&term=Daneshparvar+A&cauthor_id=32695301), and [I. Jamhiri](https://pubmed.ncbi.nlm.nih.gov/?sort=date&term=Jamhiri+I&cauthor_id=32695301). 2020. Wi-Fi (2.4 GHz) affects anti-oxidant capacity, DNA repair genes expression and, apoptosis in pregnant mouse placenta. *Iran. J. Basic. Med. Sci* 23:833-40.

Varghese, R., A. Majumdar, G. Kumar, and A. Shukla. 2018. Rats exposed to 2.45GHz of non-ionizing radiation exhibit behavioral changes with increased brain expression of apoptotic caspase 3. *Pathophysiology* 25:19-30.

[Vergallo, C](https://www.ncbi.nlm.nih.gov/pubmed/?term=Vergallo%20C%5BAuthor%5D&cauthor=true&cauthor_uid=32204392)., E. [Panzarini](https://www.ncbi.nlm.nih.gov/pubmed/?term=Panzarini%20E%5BAuthor%5D&cauthor=true&cauthor_uid=32204392), B.A. [Tenuzzo](https://www.ncbi.nlm.nih.gov/pubmed/?term=Tenuzzo%20BA%5BAuthor%5D&cauthor=true&cauthor_uid=32204392), S. [Mariano](https://www.ncbi.nlm.nih.gov/pubmed/?term=Mariano%20S%5BAuthor%5D&cauthor=true&cauthor_uid=32204392), A.M. [Tata](https://www.ncbi.nlm.nih.gov/pubmed/?term=Tata%20AM%5BAuthor%5D&cauthor=true&cauthor_uid=32204392), and L. [Dini](https://www.ncbi.nlm.nih.gov/pubmed/?term=Dini%20L%5BAuthor%5D&cauthor=true&cauthor_uid=32204392). 2020. Moderate static magnetic field (6 mT)-induced lipid rafts rearrangement increases silver NPs uptake in human lymphocytes.[*Molecules*](https://www.ncbi.nlm.nih.gov/pubmed/32204392) 25:1398.

[Vilić](https://www.tandfonline.com/author/Vili%C4%87%2C+Marinko), M.,  [I.T. Gajger](https://www.tandfonline.com/author/Tlak+Gajger%2C+Ivana),  [P. Tucak](https://www.tandfonline.com/author/Tucak%2C+Perica), A. [Štambuk](https://www.tandfonline.com/author/%C5%A0tambuk%2C+Anamaria),  [M. Šrut](https://www.tandfonline.com/author/%C5%A0rut%2C+Maja), and G. [Klobučar](https://www.tandfonline.com/author/Klobu%C4%8Dar%2C+G%C3%B6ran). 2017. Effects of short-term exposure to mobile phone radiofrequency (900 MHz) on the oxidative response and genotoxicity in honeybee larvae. *J. Api. Res* 56:430-8.

[Villarini, M](http://www.ncbi.nlm.nih.gov/pubmed?term=Villarini%20M%5BAuthor%5D&cauthor=true&cauthor_uid=23484452)., M.V. [Ambrosini, M.](http://www.ncbi.nlm.nih.gov/pubmed?term=Ambrosini%20MV%5BAuthor%5D&cauthor=true&cauthor_uid=23484452) [Moretti](http://www.ncbi.nlm.nih.gov/pubmed?term=Moretti%20M%5BAuthor%5D&cauthor=true&cauthor_uid=23484452), L. [Dominici](http://www.ncbi.nlm.nih.gov/pubmed?term=Dominici%20L%5BAuthor%5D&cauthor=true&cauthor_uid=23484452), E. [Taha](http://www.ncbi.nlm.nih.gov/pubmed?term=Taha%20E%5BAuthor%5D&cauthor=true&cauthor_uid=23484452), D. [Piobbico](http://www.ncbi.nlm.nih.gov/pubmed?term=Piobbico%20D%5BAuthor%5D&cauthor=true&cauthor_uid=23484452), C. [Gambelunghe](http://www.ncbi.nlm.nih.gov/pubmed?term=Gambelunghe%20C%5BAuthor%5D&cauthor=true&cauthor_uid=23484452), and G. [Mariucci](http://www.ncbi.nlm.nih.gov/pubmed?term=Mariucci%20G%5BAuthor%5D&cauthor=true&cauthor_uid=23484452). 2013. Brain hsp70 expression and DNA damage in mice exposed to extremely low frequency magnetic fields: a dose-response study. [*Int. J. Radiat. Biol*](http://www.ncbi.nlm.nih.gov/pubmed/23484452) 89:562-70.

Wang, X., C. Liu, Q. Ma, W. Feng, L. Yang, Y. Lu, Z. Zhou, Z. Yu, W. Li, and L. Zhang. 2015. 8-oxoG DNA glycosylase-1 inhibition sensitizes neuro-2a cells to oxidative DNA base damage induced by 900 MHz radiofrequency electromagnetic radiation. *Cell. Physiol. Biochem* 37:1075-88.

[Wolf, F.I](http://www.ncbi.nlm.nih.gov/pubmed?term=%22Wolf%20FI%22%5BAuthor%5D)., A. [Torsello](http://www.ncbi.nlm.nih.gov/pubmed?term=%22Torsello%20A%22%5BAuthor%5D), B. [Tedesco](http://www.ncbi.nlm.nih.gov/pubmed?term=%22Tedesco%20B%22%5BAuthor%5D), S. [Fasanella](http://www.ncbi.nlm.nih.gov/pubmed?term=%22Fasanella%20S%22%5BAuthor%5D), A. [Boninsegna](http://www.ncbi.nlm.nih.gov/pubmed?term=%22Boninsegna%20A%22%5BAuthor%5D), M. [D'Ascenzo](http://www.ncbi.nlm.nih.gov/pubmed?term=%22D%27Ascenzo%20M%22%5BAuthor%5D), C. [Grassi](http://www.ncbi.nlm.nih.gov/pubmed?term=%22Grassi%20C%22%5BAuthor%5D), G.B. [Azzena](http://www.ncbi.nlm.nih.gov/pubmed?term=%22Azzena%20GB%22%5BAuthor%5D), and A. [Cittadini](http://www.ncbi.nlm.nih.gov/pubmed?term=%22Cittadini%20A%22%5BAuthor%5D). 2005. 50-Hz extremely low frequency electromagnetic fields enhance cell proliferation and DNA damage: possible involvement of a redox mechanism. [*Biochim. Biophys. Acta.*](javascript:AL_get(this,%20'jour',%20'Biochim%20%0d%0aBiophys%20Acta.');)1743:120-9.

[Wu, W](http://www.ncbi.nlm.nih.gov/pubmed?term=%22Wu%20W%22%5BAuthor%5D)., K. [Yao, K](http://www.ncbi.nlm.nih.gov/pubmed?term=%22Yao%20K%22%5BAuthor%5D).J. [Wang](http://www.ncbi.nlm.nih.gov/pubmed?term=%22Wang%20KJ%22%5BAuthor%5D), D.Q. [Lu](http://www.ncbi.nlm.nih.gov/pubmed?term=%22Lu%20DQ%22%5BAuthor%5D), J.L. [He](http://www.ncbi.nlm.nih.gov/pubmed?term=%22He%20JL%22%5BAuthor%5D), L.H. [Xu](http://www.ncbi.nlm.nih.gov/pubmed?term=%22Xu%20LH%22%5BAuthor%5D), and W.J. [Sun](http://www.ncbi.nlm.nih.gov/pubmed?term=%22Sun%20WJ%22%5BAuthor%5D). 2008. [Blocking 1800 MHz mobile phone radiation-induced reactive oxygen species production and DNA damage in lens epithelial cells by noise magnetic fields]. [*Zhejiang Da Xue Xue Bao Yi Xue Ban*](http://www.ncbi.nlm.nih.gov/pubmed/18275117##) 37:34-8.

Yaguchi, H., M. Yoshida, Y. Ejima, and J. Miyakoshi. 1999. Effect of high-density extremely low frequency magnetic field on sister chromatid exchanges in mouse m5S cells. *Mutat.*

*Res* 440:189-94.

[Yakymenko, I](https://www.ncbi.nlm.nih.gov/pubmed/?term=Yakymenko%20I%5BAuthor%5D&cauthor=true&cauthor_uid=30593748)., A. [Burlaka](https://www.ncbi.nlm.nih.gov/pubmed/?term=Burlaka%20A%5BAuthor%5D&cauthor=true&cauthor_uid=30593748), I. [Tsybulin, I](https://www.ncbi.nlm.nih.gov/pubmed/?term=Tsybulin%20I%5BAuthor%5D&cauthor=true&cauthor_uid=30593748). [Brieieva](https://www.ncbi.nlm.nih.gov/pubmed/?term=Brieieva%20I%5BAuthor%5D&cauthor=true&cauthor_uid=30593748), L. [Buchynska](https://www.ncbi.nlm.nih.gov/pubmed/?term=Buchynska%20L%5BAuthor%5D&cauthor=true&cauthor_uid=30593748), I. [Tsehmistrenko](https://www.ncbi.nlm.nih.gov/pubmed/?term=Tsehmistrenko%20I%5BAuthor%5D&cauthor=true&cauthor_uid=30593748), and F. [Chekhun](https://www.ncbi.nlm.nih.gov/pubmed/?term=Chekhun%20F%5BAuthor%5D&cauthor=true&cauthor_uid=30593748). 2018. Oxidative and mutagenic effects of low intensity GSM 1800 MHz microwave radiation. [*Exp. Oncol*](https://www.ncbi.nlm.nih.gov/pubmed/30593748) 40:282-7.

[Yao, K](http://www.ncbi.nlm.nih.gov/sites/entrez?Db=pubmed&Cmd=Search&Term=%22Yao%20K%22%5BAuthor%5D&itool=EntrezSystem2.PEntrez.Pubmed.Pubmed_ResultsPanel.Pubmed_DiscoveryPanel.Pubmed_RVAbstractPlus)., W. [Wu](http://www.ncbi.nlm.nih.gov/sites/entrez?Db=pubmed&Cmd=Search&Term=%22Wu%20W%22%5BAuthor%5D&itool=EntrezSystem2.PEntrez.Pubmed.Pubmed_ResultsPanel.Pubmed_DiscoveryPanel.Pubmed_RVAbstractPlus), K. [Wang](http://www.ncbi.nlm.nih.gov/sites/entrez?Db=pubmed&Cmd=Search&Term=%22Wang%20K%22%5BAuthor%5D&itool=EntrezSystem2.PEntrez.Pubmed.Pubmed_ResultsPanel.Pubmed_DiscoveryPanel.Pubmed_RVAbstractPlus), S. [Ni](http://www.ncbi.nlm.nih.gov/sites/entrez?Db=pubmed&Cmd=Search&Term=%22Ni%20S%22%5BAuthor%5D&itool=EntrezSystem2.PEntrez.Pubmed.Pubmed_ResultsPanel.Pubmed_DiscoveryPanel.Pubmed_RVAbstractPlus), P. [Ye](http://www.ncbi.nlm.nih.gov/sites/entrez?Db=pubmed&Cmd=Search&Term=%22Ye%20P%22%5BAuthor%5D&itool=EntrezSystem2.PEntrez.Pubmed.Pubmed_ResultsPanel.Pubmed_DiscoveryPanel.Pubmed_RVAbstractPlus), Y. [Yu](http://www.ncbi.nlm.nih.gov/sites/entrez?Db=pubmed&Cmd=Search&Term=%22Yu%20Y%22%5BAuthor%5D&itool=EntrezSystem2.PEntrez.Pubmed.Pubmed_ResultsPanel.Pubmed_DiscoveryPanel.Pubmed_RVAbstractPlus), J. [Ye](http://www.ncbi.nlm.nih.gov/sites/entrez?Db=pubmed&Cmd=Search&Term=%22Ye%20J%22%5BAuthor%5D&itool=EntrezSystem2.PEntrez.Pubmed.Pubmed_ResultsPanel.Pubmed_DiscoveryPanel.Pubmed_RVAbstractPlus), and L. [Sun](http://www.ncbi.nlm.nih.gov/sites/entrez?Db=pubmed&Cmd=Search&Term=%22Sun%20L%22%5BAuthor%5D&itool=EntrezSystem2.PEntrez.Pubmed.Pubmed_ResultsPanel.Pubmed_DiscoveryPanel.Pubmed_RVAbstractPlus). 2008. Electromagnetic noise inhibits radiofrequency radiation-induced DNA damage and reactive oxygen species increase in human lens epithelial cells. [*Mol. Vis*](javascript:AL_get(this,%20'jour',%20'Mol%20Vis.');) 14:964-9.

[Yin](https://pubmed.ncbi.nlm.nih.gov/?sort=date&term=Yin+C&cauthor_id=27470406), [C](https://pubmed.ncbi.nlm.nih.gov/27470406/#affiliation-1).,  [X. Luo](https://pubmed.ncbi.nlm.nih.gov/?sort=date&term=Luo+X&cauthor_id=27470406), Y. [Duan](https://pubmed.ncbi.nlm.nih.gov/?sort=date&term=Duan+Y&cauthor_id=27470406), W. [Duan](https://pubmed.ncbi.nlm.nih.gov/?sort=date&term=Duan+W&cauthor_id=27470406), H. [Zhang](https://pubmed.ncbi.nlm.nih.gov/?sort=date&term=Zhang+H&cauthor_id=27470406), Y. [He](https://pubmed.ncbi.nlm.nih.gov/?sort=date&term=He+Y&cauthor_id=27470406), G. [Sun](https://pubmed.ncbi.nlm.nih.gov/?sort=date&term=Sun+G&cauthor_id=27470406), and X. [Sun](https://pubmed.ncbi.nlm.nih.gov/?sort=date&term=Sun+X&cauthor_id=27470406). 2016. Neuroprotective effects of lotus seedpod procyanidins on extremely low frequency electromagnetic field-induced neurotoxicity in primary cultured hippocampal neurons. *Biomed. Pharmacother*82:628-39.

[Yokus, B](http://www.ncbi.nlm.nih.gov/pubmed?term=%22Yokus%20B%22%5BAuthor%5D)., D.U. [Cakir](http://www.ncbi.nlm.nih.gov/pubmed?term=%22Cakir%20DU%22%5BAuthor%5D), M.Z. [Akdag](http://www.ncbi.nlm.nih.gov/pubmed?term=%22Akdag%20MZ%22%5BAuthor%5D), C. [Sert](http://www.ncbi.nlm.nih.gov/pubmed?term=%22Sert%20C%22%5BAuthor%5D), and N. [Mete](http://www.ncbi.nlm.nih.gov/pubmed?term=%22Mete%20N%22%5BAuthor%5D). 2005. Oxidative DNA damage in rats exposed to extremely low frequency electromagnetic fields. *F*[*ree Radic. Res.*](javascript:AL_get(this,%20'jour',%20'Free%20Radic%0d%0a%20Res.');) 39:317-23.

[Yokus, B](http://www.ncbi.nlm.nih.gov/pubmed?term=Yokus%20B%5BAuthor%5D&cauthor=true&cauthor_uid=18979312)., M.Z. [Akdag](http://www.ncbi.nlm.nih.gov/pubmed?term=Akdag%20MZ%5BAuthor%5D&cauthor=true&cauthor_uid=18979312), S. [Dasdag](http://www.ncbi.nlm.nih.gov/pubmed?term=Dasdag%20S%5BAuthor%5D&cauthor=true&cauthor_uid=18979312), D.U. [Cakir](http://www.ncbi.nlm.nih.gov/pubmed?term=Cakir%20DU%5BAuthor%5D&cauthor=true&cauthor_uid=18979312), and M. [Kizil](http://www.ncbi.nlm.nih.gov/pubmed?term=Kizil%20M%5BAuthor%5D&cauthor=true&cauthor_uid=18979312). 2008. Extremely low frequency magnetic fields cause oxidative DNA damage in rats. [*Int. J. Radiat. Biol*](http://www.ncbi.nlm.nih.gov/pubmed/18979312) 84:789-95.

[Yoon, H.E](http://www.ncbi.nlm.nih.gov/pubmed?term=Yoon%20HE%5BAuthor%5D&cauthor=true&cauthor_uid=24467330)., J.S. [Lee](http://www.ncbi.nlm.nih.gov/pubmed?term=Lee%20JS%5BAuthor%5D&cauthor=true&cauthor_uid=24467330), S.H. [Myung](http://www.ncbi.nlm.nih.gov/pubmed?term=Myung%20SH%5BAuthor%5D&cauthor=true&cauthor_uid=24467330), and Y.S. [Lee](http://www.ncbi.nlm.nih.gov/pubmed?term=Lee%20YS%5BAuthor%5D&cauthor=true&cauthor_uid=24467330). 2014. Increased γ-H2AX by exposure to a 60-Hz magnetic fields combined with ionizing radiation, but not hydrogen peroxide, in non-tumorigenic human cell lines. [*Int. J. Radiat. Biol*](http://www.ncbi.nlm.nih.gov/pubmed/24467330) 90:291-8.

[Yuan, L.Q](https://www.ncbi.nlm.nih.gov/pubmed/?term=Yuan%20LQ%5BAuthor%5D&cauthor=true&cauthor_uid=32074079)., C. [Wang](https://www.ncbi.nlm.nih.gov/pubmed/?term=Wang%20C%5BAuthor%5D&cauthor=true&cauthor_uid=32074079), D.F. [Lu](https://www.ncbi.nlm.nih.gov/pubmed/?term=Lu%20DF%5BAuthor%5D&cauthor=true&cauthor_uid=32074079), X.D. [Zhao](https://www.ncbi.nlm.nih.gov/pubmed/?term=Zhao%20XD%5BAuthor%5D&cauthor=true&cauthor_uid=32074079), L.H. [Tan](https://www.ncbi.nlm.nih.gov/pubmed/?term=Tan%20LH%5BAuthor%5D&cauthor=true&cauthor_uid=32074079), and X. [Chen](https://www.ncbi.nlm.nih.gov/pubmed/?term=Chen%20X%5BAuthor%5D&cauthor=true&cauthor_uid=32074079). 2020. Induction of apoptosis and ferroptosis by a tumor suppressing magnetic field through ROS-mediated DNA damage. [*Aging (Albany NY)*](https://www.ncbi.nlm.nih.gov/pubmed/32074079) 12:3662-81.

[Yüksel, M](http://www.ncbi.nlm.nih.gov/pubmed/?term=Y%C3%BCksel%20M%5BAuthor%5D&cauthor=true&cauthor_uid=26578367)., M. [Nazıroğlu, and M](http://www.ncbi.nlm.nih.gov/pubmed/?term=Naz%C4%B1ro%C4%9Flu%20M%5BAuthor%5D&cauthor=true&cauthor_uid=26578367).O. [Özkaya](http://www.ncbi.nlm.nih.gov/pubmed/?term=%C3%96zkaya%20MO%5BAuthor%5D&cauthor=true&cauthor_uid=26578367). 2016. Long-term exposure to electromagnetic radiation from mobile phones and Wi-Fi devices decreases plasma prolactin, progesterone, and estrogen levels but increases uterine oxidative stress in pregnant rats and their offspring. [*Endocrine*](http://www.ncbi.nlm.nih.gov/pubmed/26578367)52:352-62.

[Zendehdel, R](https://www.ncbi.nlm.nih.gov/pubmed/?term=Zendehdel%20R%5BAuthor%5D&cauthor=true&cauthor_uid=31138035)., I.J. [Yu](https://www.ncbi.nlm.nih.gov/pubmed/?term=Yu%20IJ%5BAuthor%5D&cauthor=true&cauthor_uid=31138035), B. [Hajipour-Verdom](https://www.ncbi.nlm.nih.gov/pubmed/?term=Hajipour-Verdom%20B%5BAuthor%5D&cauthor=true&cauthor_uid=31138035), and Z. [Panjali](https://www.ncbi.nlm.nih.gov/pubmed/?term=Panjali%20Z%5BAuthor%5D&cauthor=true&cauthor_uid=31138035). 2019. DNA effects of low level occupational exposure to extremely low frequency electromagnetic fields (50/60 Hz). [*Toxicol. Ind. Health*](https://www.ncbi.nlm.nih.gov/pubmed/31138035) 35:424-30.

[Zhang, Y](https://www.ncbi.nlm.nih.gov/pubmed/?term=Zhang%20Y%5BAuthor%5D&cauthor=true&cauthor_uid=27490209)., D. [Zhang](https://www.ncbi.nlm.nih.gov/pubmed/?term=Zhang%20D%5BAuthor%5D&cauthor=true&cauthor_uid=27490209), B. [Zhu](https://www.ncbi.nlm.nih.gov/pubmed/?term=Zhu%20B%5BAuthor%5D&cauthor=true&cauthor_uid=27490209), H. [Zhang](https://www.ncbi.nlm.nih.gov/pubmed/?term=Zhang%20H%5BAuthor%5D&cauthor=true&cauthor_uid=27490209), Y. [Sun](https://www.ncbi.nlm.nih.gov/pubmed/?term=Sun%20Y%5BAuthor%5D&cauthor=true&cauthor_uid=27490209), and C. [Sun](https://www.ncbi.nlm.nih.gov/pubmed/?term=Sun%20C%5BAuthor%5D&cauthor=true&cauthor_uid=27490209). 2016. Effects of dietary green tea polyphenol supplementation on the health of workers exposed to high-voltage power lines. [*Environ. Toxicol. Pharmacol*](https://www.ncbi.nlm.nih.gov/pubmed/27490209) 46:183-7.

[Zmyślony, M](http://www.ncbi.nlm.nih.gov/pubmed/?term=Zmy%C5%9Blony%20M%5BAuthor%5D&cauthor=true&cauthor_uid=15376237)., J. [Palus](http://www.ncbi.nlm.nih.gov/pubmed/?term=Palus%20J%5BAuthor%5D&cauthor=true&cauthor_uid=15376237), E. [Dziubałtowska](http://www.ncbi.nlm.nih.gov/pubmed/?term=Dziuba%C5%82towska%20E%5BAuthor%5D&cauthor=true&cauthor_uid=15376237), P. [Politański, P](http://www.ncbi.nlm.nih.gov/pubmed/?term=Polita%C5%84ski%20P%5BAuthor%5D&cauthor=true&cauthor_uid=15376237). [Mamrot](http://www.ncbi.nlm.nih.gov/pubmed/?term=Mamrot%20P%5BAuthor%5D&cauthor=true&cauthor_uid=15376237), E. [Rajkowska](http://www.ncbi.nlm.nih.gov/pubmed/?term=Rajkowska%20E%5BAuthor%5D&cauthor=true&cauthor_uid=15376237), and M. [Kameduła](http://www.ncbi.nlm.nih.gov/pubmed/?term=Kamedu%C5%82a%20M%5BAuthor%5D&cauthor=true&cauthor_uid=15376237). 2004. Effects of in vitro exposure to power frequency magnetic fields on UV-induced DNA damage of rat lymphocytes. [*Bioelectromagnetics*](http://www.ncbi.nlm.nih.gov/pubmed/15376237) 25:560-2.

[Zosangzuali](https://pubmed.ncbi.nlm.nih.gov/?sort=pubdate&term=Zosangzuali+M&cauthor_id=33687298),[M](https://pubmed.ncbi.nlm.nih.gov/33687298/#affiliation-1)., M. [Lalremruati](https://pubmed.ncbi.nlm.nih.gov/?sort=pubdate&term=Lalremruati+M&cauthor_id=33687298), C. [Lalmuansangi](https://pubmed.ncbi.nlm.nih.gov/?sort=pubdate&term=Lalmuansangi+C&cauthor_id=33687298), F. [Nghakliana](https://pubmed.ncbi.nlm.nih.gov/?sort=pubdate&term=Nghakliana+F&cauthor_id=33687298), L. [Pachuau](https://pubmed.ncbi.nlm.nih.gov/?sort=pubdate&term=Pachuau+L&cauthor_id=33687298), [P](https://pubmed.ncbi.nlm.nih.gov/33687298/#affiliation-3). Bandara, and Z. [Siama](https://pubmed.ncbi.nlm.nih.gov/?sort=pubdate&term=Zothan+Siama&cauthor_id=33687298). 2021. Effects of radiofrequency electromagnetic radiation emitted from a mobile phone base station on the redox homeostasis in different organs of Swiss albino mice. *Electromagn. Biol. Med*  40:393-407.

[Zothansiama](https://www.ncbi.nlm.nih.gov/pubmed/?term=Zothansiama%5BAuthor%5D&cauthor=true&cauthor_uid=28777669), M. [Zosangzuali, M](https://www.ncbi.nlm.nih.gov/pubmed/?term=Zosangzuali%20M%5BAuthor%5D&cauthor=true&cauthor_uid=28777669). [Lalramdinpuii](https://www.ncbi.nlm.nih.gov/pubmed/?term=Lalramdinpuii%20M%5BAuthor%5D&cauthor=true&cauthor_uid=28777669), and G.C. [Jagetia](https://www.ncbi.nlm.nih.gov/pubmed/?term=Jagetia%20GC%5BAuthor%5D&cauthor=true&cauthor_uid=28777669). 2017. Impact of radiofrequency radiation on DNA damage and antioxidants in peripheral blood lymphocytes of humans residing in the vicinity of mobile phone base stations. [*Electromagn. Biol. Med*](https://www.ncbi.nlm.nih.gov/pubmed/28777669) 36:295-305.

[Zwirska-Korczala, K](http://www.ncbi.nlm.nih.gov/pubmed?term=%22Zwirska-Korczala%20K%22%5BAuthor%5D)., M. [Adamczyk-Sowa](http://www.ncbi.nlm.nih.gov/pubmed?term=%22Adamczyk-Sowa%20M%22%5BAuthor%5D), R. [Polaniak](http://www.ncbi.nlm.nih.gov/pubmed?term=%22Polaniak%20R%22%5BAuthor%5D), P. [Sowa](http://www.ncbi.nlm.nih.gov/pubmed?term=%22Sowa%20P%22%5BAuthor%5D), E. [Birkner](http://www.ncbi.nlm.nih.gov/pubmed?term=%22Birkner%20E%22%5BAuthor%5D), Z. [Drzazga](http://www.ncbi.nlm.nih.gov/pubmed?term=%22Drzazga%20Z%22%5BAuthor%5D), T. [Brzozowski](http://www.ncbi.nlm.nih.gov/pubmed?term=%22Brzozowski%20T%22%5BAuthor%5D), and S.J. [Konturek](http://www.ncbi.nlm.nih.gov/pubmed?term=%22Konturek%20SJ%22%5BAuthor%5D). 2004. Influence of extremely-low-frequency magnetic field on antioxidative melatonin properties in AT478 murine squamous cell carcinoma culture. [*Biol. Trace Elem. Res*](javascript:AL_get(this,%20'jour',%20'Biol%20Trace%0d%0a%20Elem%20Res.');)102:227-43.
