# Supplementary material for: Cellular and molecular effects of non-ionizing electromagnetic fields
Source: publisher site journal article supplement (doi:10.1515/reveh-2023-0023), 2023-04-06
Supplement: Supplementary file 5 [file j_reveh-2023-0023_suppl_004.docx]

**Supplement 4. Effects of EMF on P-53, NFB, and MAPK**

| **P53** |  |
| --- | --- |
| RFR | Jin et al. (2021); Kim et al. (2021); [Kucukbagriacik](https://pubmed.ncbi.nlm.nih.gov/?sort=date&term=Kucukbagriacik+Y&cauthor_id=36062506) et al. (2022) |
| Static/ELF EMF | [Akbarnejad](https://pubmed.ncbi.nlm.nih.gov/?sort=date&term=Akbarnejad+Z&cauthor_id=28551545) et al. (2017a,b) (decrease and increase depending on intensity and duration of exposure); [Dehghani-Soltani](https://pubmed.ncbi.nlm.nih.gov/?sort=date&term=Dehghani-Soltani+S&cauthor_id=32644826) et al. (2021); Jin et al. (2021); Martinez et al. (2022); Mohamed et al. (2022); Sharma et al. (2021); Tian et al. (2002) (decrease); Vincenzi et al. (2012) |
| **NFB** |  |
| RFR | Ergun et al. (2022); Novoselova et al. (2017) |
| Static/ELF EMF | Kim et al. (2017); Miller et al. (2016) (decrease); Mohamed et al. (2022); Patruno et al. (2020); [Sakurai](https://pubmed.ncbi.nlm.nih.gov/?sort=date&term=Sakurai+T&cauthor_id=18163441),  [Terashima](https://pubmed.ncbi.nlm.nih.gov/?sort=date&term=Terashima+S&cauthor_id=18163441), and [Miyakoshi](https://pubmed.ncbi.nlm.nih.gov/?sort=date&term=Miyakoshi+J&cauthor_id=18163441), (2008); Tang et al. (2019); [Vianale](https://pubmed.ncbi.nlm.nih.gov/?sort=date&term=Vianale+G&cauthor_id=18410412) et al. (2008) (decrease);Vincenzi et al. (2012) (decreased);Wang et al. (2019) (decrease); Zhang et al. (2019); Zuo et al. (2018) |
| **MAPK** |  |
| RFR | [Buttiglione](https://pubmed.ncbi.nlm.nih.gov/?sort=date&term=Buttiglione+M&cauthor_id=17559061) et al. (2007); Gökçek-Saraç et al. (2017); He et al. (2016); [Leszczynski](https://pubmed.ncbi.nlm.nih.gov/?sort=date&term=Leszczynski+D&cauthor_id=12076339) et al. (2002); Novoselova et al. (2017); Sharma et al. (2019) |
| Static/ELF EMF | [Fathi](https://pubmed.ncbi.nlm.nih.gov/?sort=date&term=Fathi+E&cauthor_id=28339498) and [Farahzadi](https://pubmed.ncbi.nlm.nih.gov/?sort=date&term=Farahzadi+R&cauthor_id=28339498) (2017);Hong et al. (2014);Hou et al. (2006); Jin et al. (2000);[Kapri-Pardes](https://pubmed.ncbi.nlm.nih.gov/?sort=date&term=Kapri-Pardes+E&cauthor_id=29035881) et al. (2017); Li et al. (2013); Ma et al. (2013); Martini et al. (2020); Merighi et al. (2020); Nie and Henderson (2003); Poh et al. (2018); Soda et al. (2008); Tang et al. (2019); [Wang](https://pubmed.ncbi.nlm.nih.gov/?sort=date&term=Wang+J&cauthor_id=23592926), [Cui](https://pubmed.ncbi.nlm.nih.gov/?sort=date&term=Cui+J&cauthor_id=23592926), and [Zhu](https://pubmed.ncbi.nlm.nih.gov/?sort=date&term=Zhu+H&cauthor_id=23592926) (2013); Xu et al. (2016); Yang et al. (2016); Yong et al. (2016) |

**References**

[Akbarnejad](https://pubmed.ncbi.nlm.nih.gov/?sort=date&term=Akbarnejad+Z&cauthor_id=27874284), [Z](https://pubmed.ncbi.nlm.nih.gov/27874284/#affiliation-1)., H. [Eskandary](https://pubmed.ncbi.nlm.nih.gov/?sort=date&term=Eskandary+H&cauthor_id=27874284) , C. [Vergallo](https://pubmed.ncbi.nlm.nih.gov/?sort=date&term=Vergallo+C&cauthor_id=27874284) , S.N. [Nematollahi-Mahani](https://pubmed.ncbi.nlm.nih.gov/?sort=date&term=Nematollahi-Mahani+SN&cauthor_id=27874284),  [L. Dini](https://pubmed.ncbi.nlm.nih.gov/?sort=date&term=Dini+L&cauthor_id=27874284),  [F. Darvishzadeh-Mahani](https://pubmed.ncbi.nlm.nih.gov/?sort=date&term=Darvishzadeh-Mahani+F&cauthor_id=27874284) ,  [and M. Ahmadi](https://pubmed.ncbi.nlm.nih.gov/?sort=date&term=Ahmadi+M&cauthor_id=27874284). 2017a. Effects of extremely low-frequency pulsed electromagnetic fields (ELF-PEMFs) on glioblastoma cells (U87). *Electromagn. Biol. Med* 36:238-47.

[Akbarnejad](https://pubmed.ncbi.nlm.nih.gov/?sort=date&term=Akbarnejad+Z&cauthor_id=28551545), [Z](https://pubmed.ncbi.nlm.nih.gov/28551545/#affiliation-1)., H. [Eskandary](https://pubmed.ncbi.nlm.nih.gov/?sort=date&term=Eskandary+H&cauthor_id=28551545), L. [Dini](https://pubmed.ncbi.nlm.nih.gov/?sort=date&term=Dini+L&cauthor_id=28551545), C. [Vergallo](https://pubmed.ncbi.nlm.nih.gov/?sort=date&term=Vergallo+C&cauthor_id=28551545),  [S.N](https://pubmed.ncbi.nlm.nih.gov/28551545/#affiliation-5).  [Nematollahi-Mahani](https://pubmed.ncbi.nlm.nih.gov/?sort=date&term=Nematollahi-Mahani+SN&cauthor_id=27874284), A. [Farsinejad](https://pubmed.ncbi.nlm.nih.gov/?sort=date&term=Farsinejad+A&cauthor_id=28551545) , [M.F.S](https://pubmed.ncbi.nlm.nih.gov/28551545/#affiliation-6). Abadi, and M. [Ahmadi](https://pubmed.ncbi.nlm.nih.gov/?sort=date&term=Ahmadi+M&cauthor_id=28551545)[.](https://pubmed.ncbi.nlm.nih.gov/28551545/#affiliation-7) 2017b. Cytotoxicity of temozolomide on human glioblastoma cells is enhanced by the concomitant exposure to an extremely low-frequency electromagnetic field (100Hz, 100G). *Biomed. Pharmacother* 92:254-64.

[Buttiglione](https://pubmed.ncbi.nlm.nih.gov/?sort=date&term=Buttiglione+M&cauthor_id=17559061), [M](https://pubmed.ncbi.nlm.nih.gov/17559061/#affiliation-1).,  [L. Roca](https://pubmed.ncbi.nlm.nih.gov/?sort=date&term=Roca+L&cauthor_id=17559061), E. [Montemurno](https://pubmed.ncbi.nlm.nih.gov/?sort=date&term=Montemurno+E&cauthor_id=17559061), F. [Vitiello](https://pubmed.ncbi.nlm.nih.gov/?sort=date&term=Vitiello+F&cauthor_id=17559061), V. [Capozzi](https://pubmed.ncbi.nlm.nih.gov/?sort=date&term=Capozzi+V&cauthor_id=17559061), and G. [Cibelli](https://pubmed.ncbi.nlm.nih.gov/?sort=date&term=Cibelli+G&cauthor_id=17559061). 2007. Radiofrequency radiation (900 MHz) induces Egr-1 gene expression and affects cell-cycle control in human neuroblastoma cells. *J. Cell. Physiol* 213:759-67.

[Dehghani-Soltani](https://pubmed.ncbi.nlm.nih.gov/?sort=date&term=Dehghani-Soltani+S&cauthor_id=32644826), [S](https://pubmed.ncbi.nlm.nih.gov/32644826/#affiliation-1)., S.H. [Eftekhar-Vaghefi](https://pubmed.ncbi.nlm.nih.gov/?sort=date&term=Eftekhar-Vaghefi+SH&cauthor_id=32644826), A. [Babaee](https://pubmed.ncbi.nlm.nih.gov/?sort=date&term=Babaee+A&cauthor_id=32644826),  [M. Basiri](https://pubmed.ncbi.nlm.nih.gov/?sort=date&term=Basiri+M&cauthor_id=32644826), L. [Mohammadipoor-Ghasemabad](https://pubmed.ncbi.nlm.nih.gov/?sort=date&term=Mohammadipoor-Ghasemabad+L&cauthor_id=32644826), P. [Vosough](https://pubmed.ncbi.nlm.nih.gov/?sort=date&term=Vosough+P&cauthor_id=32644826), and M. [Ahmadi-Zeidabadi](https://pubmed.ncbi.nlm.nih.gov/?sort=date&term=Ahmadi-Zeidabadi+M&cauthor_id=32644826)[.](https://pubmed.ncbi.nlm.nih.gov/32644826/#affiliation-2) 2021. Pulsed and discontinuous electromagnetic field exposure decreases temozolomide resistance in glioblastoma by modulating the expression of O 6-methylguanine-DNA methyltransferase, cyclin-D1, and p53. *Cancer Biother. Radiopharm* 36:579-87.

[Ergun](https://pubmed.ncbi.nlm.nih.gov/?sort=date&term=Duzgun+Ergun+D&cauthor_id=34994293), [D.D](https://pubmed.ncbi.nlm.nih.gov/34994293/#affiliation-1).,  [P.N. Ozsobaci](https://pubmed.ncbi.nlm.nih.gov/?sort=date&term=Pastaci+Ozsobaci+N&cauthor_id=34994293), T. [Yilmaz](https://pubmed.ncbi.nlm.nih.gov/?sort=date&term=Yilmaz+T&cauthor_id=34994293), D. [Ozcelik](https://pubmed.ncbi.nlm.nih.gov/?sort=date&term=Ozcelik+D&cauthor_id=34994293), and M.T. [Kalkan](https://pubmed.ncbi.nlm.nih.gov/?sort=date&term=Kalkan+MT&cauthor_id=34994293). 2022. Zinc affects nuclear factor kappa b and DNA methyltransferase activity in C3H cancer fibroblast cells induced by a 2100 MHz electromagnetic field. *Electromagn. Biol. Med* 41:93-100.

[Fathi](https://pubmed.ncbi.nlm.nih.gov/?sort=date&term=Fathi+E&cauthor_id=28339498), [E](https://pubmed.ncbi.nlm.nih.gov/28339498/#affiliation-1)., and R. [Farahzadi](https://pubmed.ncbi.nlm.nih.gov/?sort=date&term=Farahzadi+R&cauthor_id=28339498). [2017.](https://pubmed.ncbi.nlm.nih.gov/28339498/#affiliation-2) Enhancement of osteogenic differentiation of rat adipose tissue-derived mesenchymal stem cells by zinc sulphate under electromagnetic field via the PKA, ERK1/2 and Wnt/β-catenin signaling pathways. *PLoS One* 12:e0173877.

[Gökçek-Saraç](https://pubmed.ncbi.nlm.nih.gov/?sort=date&term=G%C3%B6k%C3%A7ek-Sara%C3%A7+%C3%87&cauthor_id=28565929) Ç., H. [Er](https://pubmed.ncbi.nlm.nih.gov/?sort=date&term=Er+H&cauthor_id=28565929),  [C.K. Manas](https://pubmed.ncbi.nlm.nih.gov/?sort=date&term=Kencebay+Manas+C&cauthor_id=28565929),  [D.K. Gok](https://pubmed.ncbi.nlm.nih.gov/?sort=date&term=Kantar+Gok+D&cauthor_id=28565929), Ş  [Özen](https://pubmed.ncbi.nlm.nih.gov/?sort=date&term=%C3%96zen+%C5%9E&cauthor_id=28565929),  [and N. Derin](https://pubmed.ncbi.nlm.nih.gov/?sort=date&term=Derin+N&cauthor_id=28565929). 2017. Effects of acute and chronic exposure to both 900 MHz and 2100 MHz electromagnetic radiation on glutamate receptor signaling pathway. *Int. J. Radiat. Biol* 93:980-9.

[He](https://pubmed.ncbi.nlm.nih.gov/?sort=date&term=He+GL&cauthor_id=27871289), [G-L](https://pubmed.ncbi.nlm.nih.gov/27871289/#affiliation-1).,  [Z. Luo](https://pubmed.ncbi.nlm.nih.gov/?sort=date&term=Luo+Z&cauthor_id=27871289), T-T. [Shen](https://pubmed.ncbi.nlm.nih.gov/?sort=date&term=Shen+TT&cauthor_id=27871289), P. [Li](https://pubmed.ncbi.nlm.nih.gov/?sort=date&term=Li+P&cauthor_id=27871289), J. [Yang](https://pubmed.ncbi.nlm.nih.gov/?sort=date&term=Yang+J&cauthor_id=27871289), X. [Luo](https://pubmed.ncbi.nlm.nih.gov/?sort=date&term=Luo+X&cauthor_id=27871289), C-H. [Chen](https://pubmed.ncbi.nlm.nih.gov/?sort=date&term=Chen+CH&cauthor_id=27871289), P. [Gao](https://pubmed.ncbi.nlm.nih.gov/?sort=date&term=Gao+P&cauthor_id=27871289), and X-S. [Yang](https://pubmed.ncbi.nlm.nih.gov/?sort=date&term=Yang+XS&cauthor_id=27871289). 2016. Inhibition of STAT3- and MAPK-dependent PGE 2 synthesis ameliorates phagocytosis of fibrillar β-amyloid peptide (1-42) via EP2 receptor in EMF-stimulated N9 microglial cells. *J. Neuroinflammation* 13:296.

[Hong](https://pubmed.ncbi.nlm.nih.gov/?sort=date&term=Hong+JM&cauthor_id=24556539), [J.M](https://pubmed.ncbi.nlm.nih.gov/24556539/#affiliation-1)., K.S. [Kang](https://pubmed.ncbi.nlm.nih.gov/?sort=date&term=Kang+KS&cauthor_id=24556539),  [H-G](https://pubmed.ncbi.nlm.nih.gov/24556539/#affiliation-1). [Yi](https://pubmed.ncbi.nlm.nih.gov/?sort=date&term=Yi+HG&cauthor_id=24556539), S-Y. [Kim](https://pubmed.ncbi.nlm.nih.gov/?sort=date&term=Kim+SY&cauthor_id=24556539), ad D-W. [Cho](https://pubmed.ncbi.nlm.nih.gov/?sort=date&term=Cho+DW&cauthor_id=24556539). 2014. Electromagnetically controllable osteoclast activity. *Bone* 62:99-107.

[Hou](https://pubmed.ncbi.nlm.nih.gov/?sort=date&term=Hou+X&cauthor_id=17415968), [X](https://pubmed.ncbi.nlm.nih.gov/17415968/#affiliation-1)., Y-n  [Hui](https://pubmed.ncbi.nlm.nih.gov/?sort=date&term=Hui+YN&cauthor_id=17415968),  [Q-h Han](https://pubmed.ncbi.nlm.nih.gov/?sort=date&term=Han+QH&cauthor_id=17415968), X-g  [Zhang](https://pubmed.ncbi.nlm.nih.gov/?sort=date&term=Zhang+XG&cauthor_id=17415968),  [D. Hu](https://pubmed.ncbi.nlm.nih.gov/?sort=date&term=Hu+D&cauthor_id=17415968),  [and C-m Guo](https://pubmed.ncbi.nlm.nih.gov/?sort=date&term=Guo+CM&cauthor_id=17415968). 2006. [Effects of magnetic field on MAPK signaling pathways of human retinal pigment epithelial cells bound with beads in vitro]. *Zhonghua Yan Ke Za Zhi* 42:1103-8.

[Jin](https://pubmed.ncbi.nlm.nih.gov/?sort=pubdate&term=Jin+H&cauthor_id=34066270),[H](https://pubmed.ncbi.nlm.nih.gov/34066270/#affiliation-1)., K. [Kim](https://pubmed.ncbi.nlm.nih.gov/?sort=pubdate&term=Kim+K&cauthor_id=34066270), G.Y. [Park](https://pubmed.ncbi.nlm.nih.gov/?sort=pubdate&term=Park+GY&cauthor_id=34066270), M. [Kim](https://pubmed.ncbi.nlm.nih.gov/?sort=pubdate&term=Kim+M&cauthor_id=34066270), H-J. [Lee](https://pubmed.ncbi.nlm.nih.gov/?sort=pubdate&term=Lee+HJ&cauthor_id=34066270), S. [Jeon](https://pubmed.ncbi.nlm.nih.gov/?sort=pubdate&term=Jeon+S&cauthor_id=34066270),  [J.H. Kim](https://pubmed.ncbi.nlm.nih.gov/?sort=pubdate&term=Kim+JH&cauthor_id=34066270),  [H.R. Kim](https://pubmed.ncbi.nlm.nih.gov/?sort=pubdate&term=Kim+HR&cauthor_id=34066270),  [K.M. Lim](https://pubmed.ncbi.nlm.nih.gov/?sort=pubdate&term=Lim+KM&cauthor_id=34066270), [and Y.S. Lee](https://pubmed.ncbi.nlm.nih.gov/?sort=pubdate&term=Lee+YS&cauthor_id=34066270). 2021. The protective effects of EMF-LTE against DNA double-strand break damage *in vitro* and *in vivo*. *Int. J. Mol. Sci* 22:5134.

[Jin](https://pubmed.ncbi.nlm.nih.gov/?sort=date&term=Jin+M&cauthor_id=10861836), [M](https://pubmed.ncbi.nlm.nih.gov/10861836/#affiliation-1)., M. [Blank](https://pubmed.ncbi.nlm.nih.gov/?sort=date&term=Blank+M&cauthor_id=10861836), and R. [Goodman](https://pubmed.ncbi.nlm.nih.gov/?sort=date&term=Goodman+R&cauthor_id=10861836). 2000. ERK1/2 phosphorylation, induced by electromagnetic fields, diminishes during neoplastic transformation. *J. Cell. Biochem* 78:371-9.

[Kapri-Pardes](https://pubmed.ncbi.nlm.nih.gov/?sort=date&term=Kapri-Pardes+E&cauthor_id=29035881), [E](https://pubmed.ncbi.nlm.nih.gov/29035881/#affiliation-1)., T. [Hanoch](https://pubmed.ncbi.nlm.nih.gov/?sort=date&term=Hanoch+T&cauthor_id=29035881),  [G. Maik-Rachline](https://pubmed.ncbi.nlm.nih.gov/?sort=date&term=Maik-Rachline+G&cauthor_id=29035881),  [M. Murbach](https://pubmed.ncbi.nlm.nih.gov/?sort=date&term=Murbach+M&cauthor_id=29035881), P.L. [Bounds](https://pubmed.ncbi.nlm.nih.gov/?sort=date&term=Bounds+PL&cauthor_id=29035881), N. [Kuster](https://pubmed.ncbi.nlm.nih.gov/?sort=date&term=Kuster+N&cauthor_id=29035881),  [and R. Seger](https://pubmed.ncbi.nlm.nih.gov/?sort=date&term=Seger+R&cauthor_id=29035881). 2017. Activation of signaling cascades by weak extremely low frequency electromagnetic fields. *Cell. Physiol. Biochem* 43:1533-46.

[Kim](https://pubmed.ncbi.nlm.nih.gov/?sort=date&term=Kim+JH&cauthor_id=34196262), [J.H](https://pubmed.ncbi.nlm.nih.gov/34196262/#affiliation-1)., S. [Jeon](https://pubmed.ncbi.nlm.nih.gov/?sort=date&term=Jeon+S&cauthor_id=34196262),  [H-D](https://pubmed.ncbi.nlm.nih.gov/34196262/#affiliation-2) [Choi](https://pubmed.ncbi.nlm.nih.gov/?sort=date&term=Choi+HD&cauthor_id=34196262), J-H. [Lee](https://pubmed.ncbi.nlm.nih.gov/?sort=date&term=Lee+JH&cauthor_id=34196262), J-S [Bae](https://pubmed.ncbi.nlm.nih.gov/?sort=date&term=Bae+JS&cauthor_id=34196262), N [Kim](https://pubmed.ncbi.nlm.nih.gov/?sort=date&term=Kim+N&cauthor_id=34196262), H-G [Kim](https://pubmed.ncbi.nlm.nih.gov/?sort=date&term=Kim+HG&cauthor_id=34196262), K-B. [Kim](https://pubmed.ncbi.nlm.nih.gov/?sort=date&term=Kim+KB&cauthor_id=34196262), and H.R. [Kim](https://pubmed.ncbi.nlm.nih.gov/?sort=date&term=Kim+HR&cauthor_id=34196262). 2021. Exposure to long-term evolution radiofrequency electromagnetic fields decreases neuroblastoma cell proliferation via Akt/mTOR-mediated cellular senescence. *J. Toxicol. Environ. Health A* 84:846-57.

[Kim](https://pubmed.ncbi.nlm.nih.gov/?sort=date&term=Kim+SJ&cauthor_id=28370033), [S.J](https://pubmed.ncbi.nlm.nih.gov/28370033/#affiliation-1)., Y.W.  [Jang](https://pubmed.ncbi.nlm.nih.gov/?sort=date&term=Jang+YW&cauthor_id=28370033),  [K.E. Hyung](https://pubmed.ncbi.nlm.nih.gov/?sort=date&term=Hyung+KE&cauthor_id=28370033), D.K.  [Lee](https://pubmed.ncbi.nlm.nih.gov/?sort=date&term=Lee+DK&cauthor_id=28370033), K.H.  [Hyun](https://pubmed.ncbi.nlm.nih.gov/?sort=date&term=Hyun+KH&cauthor_id=28370033), S.H.  [Jeong](https://pubmed.ncbi.nlm.nih.gov/?sort=date&term=Jeong+SH&cauthor_id=28370033) , K.H. [Min](https://pubmed.ncbi.nlm.nih.gov/?sort=date&term=Min+KH&cauthor_id=28370033), W. [Kang](https://pubmed.ncbi.nlm.nih.gov/?sort=date&term=Kang+W&cauthor_id=28370033), J.H. [Jeong](https://pubmed.ncbi.nlm.nih.gov/?sort=date&term=Jeong+JH&cauthor_id=28370033), S-Y. [Park](https://pubmed.ncbi.nlm.nih.gov/?sort=date&term=Park+SY&cauthor_id=28370033), and K.W. [Hwang](https://pubmed.ncbi.nlm.nih.gov/?sort=date&term=Hwang+KW&cauthor_id=28370033). 2017. Extremely low-frequency electromagnetic field exposure enhances inflammatory response and inhibits effect of antioxidant in RAW 264.7 cells. *Bioelectromagnetics* 38:374-85.

[Kucukbagriacik](https://pubmed.ncbi.nlm.nih.gov/?sort=date&term=Kucukbagriacik+Y&cauthor_id=36062506), [Y](https://pubmed.ncbi.nlm.nih.gov/36062506/#affiliation-1),  [M. Dastouri](https://pubmed.ncbi.nlm.nih.gov/?sort=date&term=Dastouri+M&cauthor_id=36062506), E.  [Ozgur-Buyukatalay](https://pubmed.ncbi.nlm.nih.gov/?sort=date&term=Ozgur-Buyukatalay+E&cauthor_id=36062506),  [O.A. Akarca Dizakar](https://pubmed.ncbi.nlm.nih.gov/?sort=date&term=Akarca+Dizakar+O&cauthor_id=36062506),  [and K. Yegin](https://pubmed.ncbi.nlm.nih.gov/?sort=date&term=Yegin+K&cauthor_id=36062506). 2022. Investigation of oxidative damage, antioxidant balance, DNA repair genes, and apoptosis due to radiofrequency-induced adaptive response in mice. *Electromagn. Biol. Med* 41:389-401.

[Leszczynski](https://pubmed.ncbi.nlm.nih.gov/?sort=date&term=Leszczynski+D&cauthor_id=12076339), [D](https://pubmed.ncbi.nlm.nih.gov/12076339/#affiliation-1)., S. [Joenväärä](https://pubmed.ncbi.nlm.nih.gov/?sort=date&term=Joenv%C3%A4%C3%A4r%C3%A4+S&cauthor_id=12076339), J. [Reivinen](https://pubmed.ncbi.nlm.nih.gov/?sort=date&term=Reivinen+J&cauthor_id=12076339), and R. [Kuokka](https://pubmed.ncbi.nlm.nih.gov/?sort=date&term=Kuokka+R&cauthor_id=12076339). 2002. Non-thermal activation of the hsp27/p38MAPK stress pathway by mobile phone radiation in human endothelial cells: molecular mechanism for cancer- and blood-brain barrier-related effects. *Differentiation* 70(2-3):120-9.

[Li](https://pubmed.ncbi.nlm.nih.gov/?sort=date&term=Li+HJ&cauthor_id=23570913), [H-J](https://pubmed.ncbi.nlm.nih.gov/23570913/#affiliation-1).,  [L-M. Guo](https://pubmed.ncbi.nlm.nih.gov/?sort=date&term=Guo+LM&cauthor_id=23570913), L-L. [Yang](https://pubmed.ncbi.nlm.nih.gov/?sort=date&term=Yang+LL&cauthor_id=23570913), Y-C. [Zhou](https://pubmed.ncbi.nlm.nih.gov/?sort=date&term=Zhou+YC&cauthor_id=23570913),  [Y-J. Zhang](https://pubmed.ncbi.nlm.nih.gov/?sort=date&term=Zhang+YJ&cauthor_id=23570913), J. [Guo](https://pubmed.ncbi.nlm.nih.gov/?sort=date&term=Guo+J&cauthor_id=23570913), X-J. [Xie](https://pubmed.ncbi.nlm.nih.gov/?sort=date&term=Xie+XJ&cauthor_id=23570913), and G-Z. [Guo](https://pubmed.ncbi.nlm.nih.gov/?sort=date&term=Guo+GZ&cauthor_id=23570913). 2013. Electromagnetic-pulse-induced activation of p38 MAPK pathway and disruption of blood-retinal barrier. *Toxicol. Lett* 220:35-43.

[Ma](https://pubmed.ncbi.nlm.nih.gov/?sort=date&term=Ma+J&cauthor_id=23201339), [J](https://pubmed.ncbi.nlm.nih.gov/23201339/#affiliation-1)., Z. [Zhang](https://pubmed.ncbi.nlm.nih.gov/?sort=date&term=Zhang+Z&cauthor_id=23201339), Y. [Su](https://pubmed.ncbi.nlm.nih.gov/?sort=date&term=Su+Y&cauthor_id=23201339), L. [Kang](https://pubmed.ncbi.nlm.nih.gov/?sort=date&term=Kang+L&cauthor_id=23201339), D. [Geng](https://pubmed.ncbi.nlm.nih.gov/?sort=date&term=Geng+D&cauthor_id=23201339),  [Y. Wang](https://pubmed.ncbi.nlm.nih.gov/?sort=date&term=Wang+Y&cauthor_id=23201339), F. [Luan](https://pubmed.ncbi.nlm.nih.gov/?sort=date&term=Luan+F&cauthor_id=23201339), M. [Wang](https://pubmed.ncbi.nlm.nih.gov/?sort=date&term=Wang+M&cauthor_id=23201339), and H. [Cui](https://pubmed.ncbi.nlm.nih.gov/?sort=date&term=Cui+H&cauthor_id=23201339). 2013. Magnetic stimulation modulates structural synaptic plasticity and regulates BDNF-TrkB signal pathway in cultured hippocampal neurons. *Neurochem. Int* 62:84-91.

[Martínez](https://pubmed.ncbi.nlm.nih.gov/?sort=date&term=Mart%C3%ADnez+MA&cauthor_id=35949615), [M.A](https://pubmed.ncbi.nlm.nih.gov/35949615/#affiliation-1).,  [A. Úbeda](https://pubmed.ncbi.nlm.nih.gov/?sort=date&term=%C3%9Abeda+A&cauthor_id=35949615), [J. Martínez-Botas](https://pubmed.ncbi.nlm.nih.gov/?sort=date&term=Mart%C3%ADnez-Botas+J&cauthor_id=35949615), [M.Á. Trillo](https://pubmed.ncbi.nlm.nih.gov/?sort=date&term=Trillo+M%C3%81&cauthor_id=35949615)[.](https://pubmed.ncbi.nlm.nih.gov/35949615/#affiliation-1) 2022. Field exposure to 50 Hz significantly affects wild-type and unfolded p53 expression in NB69 neuroblastoma cells. *Oncol. Lett* 24:295.

[Martini](https://pubmed.ncbi.nlm.nih.gov/?sort=date&term=Martini+F&cauthor_id=32204349), [F](https://pubmed.ncbi.nlm.nih.gov/32204349/#affiliation-1)., A. [Pellati](https://pubmed.ncbi.nlm.nih.gov/?sort=date&term=Pellati+A&cauthor_id=32204349), [E.](https://pubmed.ncbi.nlm.nih.gov/32204349/#affiliation-2)  [Mazzoni](https://pubmed.ncbi.nlm.nih.gov/?sort=date&term=Mazzoni+E&cauthor_id=32204349),  [S. Salati](https://pubmed.ncbi.nlm.nih.gov/?sort=date&term=Salati+S&cauthor_id=32204349), G. [Caruso](https://pubmed.ncbi.nlm.nih.gov/?sort=date&term=Caruso+G&cauthor_id=32204349), D. [Contartese](https://pubmed.ncbi.nlm.nih.gov/?sort=date&term=Contartese+D&cauthor_id=32204349), and M. [De Mattei](https://pubmed.ncbi.nlm.nih.gov/?sort=date&term=De+Mattei+M&cauthor_id=32204349). 2020. Bone morphogenetic protein-2 signaling in the osteogenic differentiation of human bone marrow mesenchymal stem cells induced by pulsed electromagnetic fields. *Int. J. Mol. Sci* 21:2104.

[Merighi](https://pubmed.ncbi.nlm.nih.gov/?sort=date&term=Merighi+S&cauthor_id=31400640), [S](https://pubmed.ncbi.nlm.nih.gov/31400640/#affiliation-1).,  [S. Gessi](https://pubmed.ncbi.nlm.nih.gov/?sort=date&term=Gessi+S&cauthor_id=31400640), S. [Bencivenni](https://pubmed.ncbi.nlm.nih.gov/?sort=date&term=Bencivenni+S&cauthor_id=31400640), E. [Battistello](https://pubmed.ncbi.nlm.nih.gov/?sort=date&term=Battistello+E&cauthor_id=31400640), F. [Vincenzi](https://pubmed.ncbi.nlm.nih.gov/?sort=date&term=Vincenzi+F&cauthor_id=31400640),  [S. Setti](https://pubmed.ncbi.nlm.nih.gov/?sort=date&term=Setti+S&cauthor_id=31400640), M. [Cadossi](https://pubmed.ncbi.nlm.nih.gov/?sort=date&term=Cadossi+M&cauthor_id=31400640),  [P.A. Borea](https://pubmed.ncbi.nlm.nih.gov/?sort=date&term=Borea+PA&cauthor_id=31400640), R. [Cadossi](https://pubmed.ncbi.nlm.nih.gov/?sort=date&term=Cadossi+R&cauthor_id=31400640), and K. [Varani](https://pubmed.ncbi.nlm.nih.gov/?sort=date&term=Varani+K&cauthor_id=31400640). 2020. Signaling pathways involved in anti-inflammatory effects of Pulsed Electromagnetic Field in microglial cells. *Cytokine* 125:154777.

[Miller](https://pubmed.ncbi.nlm.nih.gov/?sort=date&term=Miller+SL&cauthor_id=26780754), [S.L](https://pubmed.ncbi.nlm.nih.gov/26780754/#affiliation-1).,  [D.G. Coughlin](https://pubmed.ncbi.nlm.nih.gov/?sort=date&term=Coughlin+DG&cauthor_id=26780754), E.I. [Waldorff](https://pubmed.ncbi.nlm.nih.gov/?sort=date&term=Waldorff+EI&cauthor_id=26780754), J.T. [Ryaby](https://pubmed.ncbi.nlm.nih.gov/?sort=date&term=Ryaby+JT&cauthor_id=26780754), and J.C. [Lotz](https://pubmed.ncbi.nlm.nih.gov/?sort=date&term=Lotz+JC&cauthor_id=26780754). 2016. Pulsed electromagnetic field (PEMF) treatment reduces expression of genes associated with disc degeneration in human intervertebral disc cells. *Spine J* 16:770-6.

[Mohamed](https://pubmed.ncbi.nlm.nih.gov/?sort=date&term=Mohamed+AF&cauthor_id=35120563), [A.F](https://pubmed.ncbi.nlm.nih.gov/35120563/#affiliation-1)., M. [Nasr](https://pubmed.ncbi.nlm.nih.gov/?sort=date&term=Nasr+M&cauthor_id=35120563). [M](https://pubmed.ncbi.nlm.nih.gov/35120563/#affiliation-2).E. [Amer](https://pubmed.ncbi.nlm.nih.gov/?sort=date&term=Amer+ME&cauthor_id=35120563), T.M.M. [Abuamara](https://pubmed.ncbi.nlm.nih.gov/?sort=date&term=Abuamara+TMM&cauthor_id=35120563), [W.M](https://pubmed.ncbi.nlm.nih.gov/35120563/#affiliation-2).  [Abd-Elhay](https://pubmed.ncbi.nlm.nih.gov/?sort=date&term=Abd-Elhay+WM&cauthor_id=35120563),  [H.F. Kaabo](https://pubmed.ncbi.nlm.nih.gov/?sort=date&term=Kaabo+HF&cauthor_id=35120563), E.E.R. [Matar](https://pubmed.ncbi.nlm.nih.gov/?sort=date&term=Matar+EER&cauthor_id=35120563),  [L.E. El Moselhy](https://pubmed.ncbi.nlm.nih.gov/?sort=date&term=El+Moselhy+LE&cauthor_id=35120563), T.A. [Gomah](https://pubmed.ncbi.nlm.nih.gov/?sort=date&term=Gomah+TA&cauthor_id=35120563), M.A. [El-Fatah Deban](https://pubmed.ncbi.nlm.nih.gov/?sort=date&term=Deban+MAE&cauthor_id=35120563), and R.I. [Shebl](https://pubmed.ncbi.nlm.nih.gov/?sort=date&term=Shebl+RI&cauthor_id=35120563). 2022. Anticancer and antibacterial potentials induced post short-term exposure to electromagnetic field and silver nanoparticles and related pathological and genetic alterations: in vitro study. *Infect. Agent Cancer* 17:4.

[Nie](https://pubmed.ncbi.nlm.nih.gov/?sort=date&term=Nie+K&cauthor_id=14635193), [K](https://pubmed.ncbi.nlm.nih.gov/14635193/#affiliation-1)., and A. [Henderson](https://pubmed.ncbi.nlm.nih.gov/?sort=date&term=Henderson+A&cauthor_id=14635193). 2003. MAP kinase activation in cells exposed to a 60 Hz electromagnetic field. *J. Cell. Biochem* 90:1197-206.

[Novoselova](https://pubmed.ncbi.nlm.nih.gov/?sort=date&term=Novoselova+EG&cauthor_id=29101623), [E.G](https://pubmed.ncbi.nlm.nih.gov/29101623/#affiliation-1).,  [O.V. Glushkova](https://pubmed.ncbi.nlm.nih.gov/?sort=date&term=Glushkova+OV&cauthor_id=29101623), M.O. [Khrenov](https://pubmed.ncbi.nlm.nih.gov/?sort=date&term=Khrenov+MO&cauthor_id=29101623), S.B. [Parfenyuk](https://pubmed.ncbi.nlm.nih.gov/?sort=date&term=Parfenyuk+SB&cauthor_id=29101623), S.M. [Lunin](https://pubmed.ncbi.nlm.nih.gov/?sort=date&term=Lunin+SM&cauthor_id=29101623), E.V. [Vinogradova](https://pubmed.ncbi.nlm.nih.gov/?sort=date&term=Vinogradova+EV&cauthor_id=29101623), T.V. [Novoselova](https://pubmed.ncbi.nlm.nih.gov/?sort=date&term=Novoselova+TV&cauthor_id=29101623), and E.E. [Fesenko](https://pubmed.ncbi.nlm.nih.gov/?sort=date&term=Fesenko+EE&cauthor_id=29101623). 2017. Involvement of the p38 MAPK signaling cascade in stress response of RAW 264.7 macrophages. *Dokl. Biol. Sci* 476:203-5.

[Patruno](https://pubmed.ncbi.nlm.nih.gov/?sort=date&term=Patruno+A&cauthor_id=33023074), [A](https://pubmed.ncbi.nlm.nih.gov/33023074/#affiliation-1)., E. [Costantini](https://pubmed.ncbi.nlm.nih.gov/?sort=date&term=Costantini+E&cauthor_id=33023074),  [A. Ferrone](https://pubmed.ncbi.nlm.nih.gov/?sort=date&term=Ferrone+A&cauthor_id=33023074),  [M. Pesce](https://pubmed.ncbi.nlm.nih.gov/?sort=date&term=Pesce+M&cauthor_id=33023074),  [F. Diomede](https://pubmed.ncbi.nlm.nih.gov/?sort=date&term=Diomede+F&cauthor_id=33023074), O. [Trubiani](https://pubmed.ncbi.nlm.nih.gov/?sort=date&term=Trubiani+O&cauthor_id=33023074), and M. [Reale](https://pubmed.ncbi.nlm.nih.gov/?sort=date&term=Reale+M&cauthor_id=33023074). 2020. Short ELF-EMF exposure targets SIRT1/Nrf2/HO-1 signaling in THP-1 cells. *Int. J. Mol. Sci* 21:7284.

[Poh](https://pubmed.ncbi.nlm.nih.gov/?sort=date&term=Poh+PSP&cauthor_id=30123287), [P.S.P](https://pubmed.ncbi.nlm.nih.gov/30123287/#affiliation-1)., C. [Seeliger](https://pubmed.ncbi.nlm.nih.gov/?sort=date&term=Seeliger+C&cauthor_id=30123287), M. [Unger](https://pubmed.ncbi.nlm.nih.gov/?sort=date&term=Unger+M&cauthor_id=30123287), K. [Falldorf](https://pubmed.ncbi.nlm.nih.gov/?sort=date&term=Falldorf+K&cauthor_id=30123287), E.R. [Balmayor](https://pubmed.ncbi.nlm.nih.gov/?sort=date&term=Balmayor+ER&cauthor_id=30123287), and M. [van Griensven](https://pubmed.ncbi.nlm.nih.gov/?sort=date&term=van+Griensven+M&cauthor_id=30123287). 2018. Osteogenic effect and cell signaling activation of extremely low-frequency pulsed electromagnetic fields in adipose-derived mesenchymal stromal cells. *Stem Cell. Int* 2018:5402853.

[Sakurai](https://pubmed.ncbi.nlm.nih.gov/?sort=date&term=Sakurai+T&cauthor_id=18163441), [T](https://pubmed.ncbi.nlm.nih.gov/18163441/#affiliation-1)., S. [Terashima](https://pubmed.ncbi.nlm.nih.gov/?sort=date&term=Terashima+S&cauthor_id=18163441), and J. [Miyakoshi](https://pubmed.ncbi.nlm.nih.gov/?sort=date&term=Miyakoshi+J&cauthor_id=18163441). 2008. Enhanced secretion of prostaglandin E2 from osteoblasts by exposure to a strong static magnetic field. *Bioelectromagnetics* 29:277-83.

[Sharma](https://pubmed.ncbi.nlm.nih.gov/?sort=date&term=Sharma+S&cauthor_id=31129098) [S](https://pubmed.ncbi.nlm.nih.gov/31129098/#affiliation-1),  [S-Y. Wu](https://pubmed.ncbi.nlm.nih.gov/?sort=date&term=Wu+SY&cauthor_id=31129098), H. [Jimenez](https://pubmed.ncbi.nlm.nih.gov/?sort=date&term=Jimenez+H&cauthor_id=31129098), F. [Xing](https://pubmed.ncbi.nlm.nih.gov/?sort=date&term=Xing+F&cauthor_id=31129098), D. [Zhu](https://pubmed.ncbi.nlm.nih.gov/?sort=date&term=Zhu+D&cauthor_id=31129098), Y. [Liu](https://pubmed.ncbi.nlm.nih.gov/?sort=date&term=Liu+Y&cauthor_id=31129098), K. [Wu](https://pubmed.ncbi.nlm.nih.gov/?sort=date&term=Wu+K&cauthor_id=31129098), A. [Tyagi](https://pubmed.ncbi.nlm.nih.gov/?sort=date&term=Tyagi+A&cauthor_id=31129098), D. [Zhao](https://pubmed.ncbi.nlm.nih.gov/?sort=date&term=Zhao+D&cauthor_id=31129098), H-W. [Lo](https://pubmed.ncbi.nlm.nih.gov/?sort=date&term=Lo+HW&cauthor_id=31129098), et al. 2019. Ca 2+ and CACNA1H mediate targeted suppression of breast cancer brain metastasis by AM RF EMF. *EBioMedicine* 44:194-208.

[Sharma](https://pubmed.ncbi.nlm.nih.gov/?sort=date&term=Sharma+AK&cauthor_id=34597162), [A.K](https://pubmed.ncbi.nlm.nih.gov/34597162/#affiliation-1)., S. [Sah](https://pubmed.ncbi.nlm.nih.gov/?sort=date&term=Sah+S&cauthor_id=34597162), [S](https://pubmed.ncbi.nlm.nih.gov/34597162/#affiliation-1).K. [Singla](https://pubmed.ncbi.nlm.nih.gov/?sort=date&term=Singla+SK&cauthor_id=34597162), M.S. [Chauhan](https://pubmed.ncbi.nlm.nih.gov/?sort=date&term=Chauhan+MS&cauthor_id=34597162), [R.S. Manik](https://pubmed.ncbi.nlm.nih.gov/?sort=date&term=Manik+RS&cauthor_id=34597162),  [and P. Palta](https://pubmed.ncbi.nlm.nih.gov/?sort=date&term=Palta+P&cauthor_id=34597162). 2021. Exposure to pulsed electromagnetic fields improves the developmental competence and quality of somatic cell nuclear transfer buffalo (Bubalus bubalis) embryos produced using fibroblast cells and alters their epigenetic status and gene expression. *Cell. Reprogram* 23:304-15.

[Soda](https://pubmed.ncbi.nlm.nih.gov/?sort=date&term=Soda+A&cauthor_id=18797142), [A](https://pubmed.ncbi.nlm.nih.gov/18797142/#affiliation-1)., T. [Ikehara](https://pubmed.ncbi.nlm.nih.gov/?sort=date&term=Ikehara+T&cauthor_id=18797142), Y. [Kinouchi](https://pubmed.ncbi.nlm.nih.gov/?sort=date&term=Kinouchi+Y&cauthor_id=18797142), and K. [Yoshizaki](https://pubmed.ncbi.nlm.nih.gov/?sort=date&term=Yoshizaki+K&cauthor_id=18797142). 2008. Effect of exposure to an extremely low frequency-electromagnetic field on the cellular collagen with respect to signaling pathways in osteoblast-like cells. *J. Med. Invest* 55:267-78.

[Tang](https://pubmed.ncbi.nlm.nih.gov/?sort=date&term=Tang+X&cauthor_id=31689248) [X.](https://pubmed.ncbi.nlm.nih.gov/31689248/#affiliation-1), [D. Coughlin](https://pubmed.ncbi.nlm.nih.gov/?sort=date&term=Coughlin+D&cauthor_id=31689248), A[. Ballatori](https://pubmed.ncbi.nlm.nih.gov/?sort=date&term=Ballatori+A&cauthor_id=31689248), [B. Berg-Johansen](https://pubmed.ncbi.nlm.nih.gov/?sort=date&term=Berg-Johansen+B&cauthor_id=31689248), [E.I. Waldorff](https://pubmed.ncbi.nlm.nih.gov/?sort=date&term=Waldorff+EI&cauthor_id=31689248), [N. Zhang](https://pubmed.ncbi.nlm.nih.gov/?sort=date&term=Zhang+N&cauthor_id=31689248), [J. T. Ryaby](https://pubmed.ncbi.nlm.nih.gov/?sort=date&term=Ryaby+JT&cauthor_id=31689248), [T. Aliston](https://pubmed.ncbi.nlm.nih.gov/?sort=date&term=Aliston+T&cauthor_id=31689248), [J. C. Lotz](https://pubmed.ncbi.nlm.nih.gov/?sort=date&term=Lotz+JC&cauthor_id=31689248). [2019.](https://pubmed.ncbi.nlm.nih.gov/31689248/#affiliation-1) Pulsed electromagnetic fields reduce interleukin-6 expression in intervertebral disc cells via nuclear factor-κβ and mitogen-activated protein kinase p38 pathways. *Spine* 44:E1290-E1297.

[Tian](https://pubmed.ncbi.nlm.nih.gov/?sort=date&term=Tian+F&cauthor_id=11906169), [F](https://pubmed.ncbi.nlm.nih.gov/11906169/#affiliation-1)., T. [Nakahara](https://pubmed.ncbi.nlm.nih.gov/?sort=date&term=Nakahara+T&cauthor_id=11906169), M. [Yoshida](https://pubmed.ncbi.nlm.nih.gov/?sort=date&term=Yoshida+M&cauthor_id=11906169), N. [Honda](https://pubmed.ncbi.nlm.nih.gov/?sort=date&term=Honda+N&cauthor_id=11906169), H. [Hirose](https://pubmed.ncbi.nlm.nih.gov/?sort=date&term=Hirose+H&cauthor_id=11906169), and J. [Miyakoshi](https://pubmed.ncbi.nlm.nih.gov/?sort=date&term=Miyakoshi+J&cauthor_id=11906169). 2002. Exposure to power frequency magnetic fields suppresses X-ray-induced apoptosis transiently in Ku80-deficient xrs5 cells. *Biochem. Biophys. Res. Commun* 292:355-61.

[Vianale](https://pubmed.ncbi.nlm.nih.gov/?sort=date&term=Vianale+G&cauthor_id=18410412), [G](https://pubmed.ncbi.nlm.nih.gov/18410412/#affiliation-1)., [M. Reale](https://pubmed.ncbi.nlm.nih.gov/?sort=date&term=Reale+M&cauthor_id=18410412), [P. Amerio](https://pubmed.ncbi.nlm.nih.gov/?sort=date&term=Amerio+P&cauthor_id=18410412), [M. Stefanachi](https://pubmed.ncbi.nlm.nih.gov/?sort=date&term=Stefanachi+M&cauthor_id=18410412), [S. Di Luzio](https://pubmed.ncbi.nlm.nih.gov/?sort=date&term=Di+Luzio+S&cauthor_id=18410412), and [R. Muraro](https://pubmed.ncbi.nlm.nih.gov/?sort=date&term=Muraro+R&cauthor_id=18410412). 2008. Extremely low frequency electromagnetic field enhances human keratinocyte cell growth and decreases proinflammatory chemokine production. *Br. J. Dermatol* 158:1189-96.

[Vincenzi](https://pubmed.ncbi.nlm.nih.gov/?sort=date&term=Vincenzi+F&cauthor_id=22761760), [F](https://pubmed.ncbi.nlm.nih.gov/22761760/#affiliation-1)., M. [Targa](https://pubmed.ncbi.nlm.nih.gov/?sort=date&term=Targa+M&cauthor_id=22761760), C. [Corciulo](https://pubmed.ncbi.nlm.nih.gov/?sort=date&term=Corciulo+C&cauthor_id=22761760), S. [Gessi](https://pubmed.ncbi.nlm.nih.gov/?sort=date&term=Gessi+S&cauthor_id=22761760), S.  [Merighi](https://pubmed.ncbi.nlm.nih.gov/?sort=date&term=Merighi+S&cauthor_id=22761760), S.  [Setti](https://pubmed.ncbi.nlm.nih.gov/?sort=date&term=Setti+S&cauthor_id=22761760),  [R. Cadossi](https://pubmed.ncbi.nlm.nih.gov/?sort=date&term=Cadossi+R&cauthor_id=22761760), P.A. [Borea](https://pubmed.ncbi.nlm.nih.gov/?sort=date&term=Borea+PA&cauthor_id=22761760), and K. [Varani](https://pubmed.ncbi.nlm.nih.gov/?sort=date&term=Varani+K&cauthor_id=22761760). 2012. The anti-tumor effect of A3 adenosine receptors is potentiated by pulsed electromagnetic fields in cultured neural cancer cells. *PLoS One* 7:e39317.

[Wang](https://pubmed.ncbi.nlm.nih.gov/?sort=date&term=Wang+C&cauthor_id=30628673), [C](https://pubmed.ncbi.nlm.nih.gov/30628673/#affiliation-1)., Y. [Liu](https://pubmed.ncbi.nlm.nih.gov/?sort=date&term=Liu+Y&cauthor_id=30628673), [Y](https://pubmed.ncbi.nlm.nih.gov/30628673/#affiliation-2).  [Wang](https://pubmed.ncbi.nlm.nih.gov/?sort=date&term=Wang+Y&cauthor_id=30628673), Z. [Wei](https://pubmed.ncbi.nlm.nih.gov/?sort=date&term=Wei+Z&cauthor_id=30628673), D. [Suo](https://pubmed.ncbi.nlm.nih.gov/?sort=date&term=Suo+D&cauthor_id=30628673), G. [Ning](https://pubmed.ncbi.nlm.nih.gov/?sort=date&term=Ning+G&cauthor_id=30628673), Q. [Wu](https://pubmed.ncbi.nlm.nih.gov/?sort=date&term=Wu+Q&cauthor_id=30628673), S. [Feng](https://pubmed.ncbi.nlm.nih.gov/?sort=date&term=Feng+S&cauthor_id=30628673), and C. [Wan](https://pubmed.ncbi.nlm.nih.gov/?sort=date&term=Wan+C&cauthor_id=30628673). 2019. Low‑frequency pulsed electromagnetic field promotes functional recovery, reduces inflammation and oxidative stress, and enhances HSP70 expression following spinal cord injury. *Mol. Med. Rep* 19:1687-93.

[Wang](https://pubmed.ncbi.nlm.nih.gov/?sort=date&term=Wang+J&cauthor_id=23592926), [J](https://pubmed.ncbi.nlm.nih.gov/23592926/#affiliation-1).,  [J. Cui](https://pubmed.ncbi.nlm.nih.gov/?sort=date&term=Cui+J&cauthor_id=23592926), and H. [Zhu](https://pubmed.ncbi.nlm.nih.gov/?sort=date&term=Zhu+H&cauthor_id=23592926). 2013. Suppression of type I collagen in human scleral fibroblasts treated with extremely low-frequency electromagnetic fields. *Mol. Vis* 19:885-93.

[Xu](https://pubmed.ncbi.nlm.nih.gov/?sort=date&term=Xu+H&cauthor_id=27629357), [H](https://pubmed.ncbi.nlm.nih.gov/27629357/#affiliation-1)., J. [Zhang](https://pubmed.ncbi.nlm.nih.gov/?sort=date&term=Zhang+J&cauthor_id=27629357), Y. [Lei](https://pubmed.ncbi.nlm.nih.gov/?sort=date&term=Lei+Y&cauthor_id=27629357), Z. [Han](https://pubmed.ncbi.nlm.nih.gov/?sort=date&term=Han+Z&cauthor_id=27629357), D. [Rong](https://pubmed.ncbi.nlm.nih.gov/?sort=date&term=Rong+D&cauthor_id=27629357), Q. [Yu](https://pubmed.ncbi.nlm.nih.gov/?sort=date&term=Yu+Q&cauthor_id=27629357), M. [Zhao](https://pubmed.ncbi.nlm.nih.gov/?sort=date&term=Zhao+M&cauthor_id=27629357), and J. [Tian](https://pubmed.ncbi.nlm.nih.gov/?sort=date&term=Tian+J&cauthor_id=27629357). 2016. Low frequency pulsed electromagnetic field promotes C2C12 myoblasts proliferation via activation of MAPK/ERK pathway. *Biochem. Biophys. Res. Commun* 479:97-102.

[Yang](https://pubmed.ncbi.nlm.nih.gov/?sort=date&term=Yang+LL&cauthor_id=26688329), [L-L](https://pubmed.ncbi.nlm.nih.gov/26688329/#affiliation-1)., Y. [Zhou](https://pubmed.ncbi.nlm.nih.gov/?sort=date&term=Zhou+Y&cauthor_id=26688329), W-D. [Tian](https://pubmed.ncbi.nlm.nih.gov/?sort=date&term=Tian+WD&cauthor_id=26688329), H-J. [Li](https://pubmed.ncbi.nlm.nih.gov/?sort=date&term=Li+HJ&cauthor_id=26688329),  [K-C](https://pubmed.ncbi.nlm.nih.gov/26688329/#affiliation-2) Li, X. [Miao](https://pubmed.ncbi.nlm.nih.gov/?sort=date&term=Miao+X&cauthor_id=26688329),  [G-Z. An](https://pubmed.ncbi.nlm.nih.gov/?sort=date&term=An+GZ&cauthor_id=26688329),  [X-W. Wang](https://pubmed.ncbi.nlm.nih.gov/?sort=date&term=Wang+XW&cauthor_id=26688329), G-Z. [Guo](https://pubmed.ncbi.nlm.nih.gov/?sort=date&term=Guo+GZ&cauthor_id=26688329),  [and G-R. Ding](https://pubmed.ncbi.nlm.nih.gov/?sort=date&term=Ding+GR&cauthor_id=26688329). 2016. Electromagnetic pulse activated brain microglia via the p38 MAPK pathway. *Neurotoxicology* 52:144-9.

[Yong](https://pubmed.ncbi.nlm.nih.gov/?sort=date&term=Yong+Y&cauthor_id=24634418), [Y](https://pubmed.ncbi.nlm.nih.gov/24634418/#affiliation-1).,  [Z.D](https://pubmed.ncbi.nlm.nih.gov/24634418/#affiliation-1). Ming,  [L](https://pubmed.ncbi.nlm.nih.gov/24634418/#affiliation-2). Feng,  [Z.W](https://pubmed.ncbi.nlm.nih.gov/24634418/#affiliation-3). Chun, and W. [Hua](https://pubmed.ncbi.nlm.nih.gov/?sort=date&term=Hua+W&cauthor_id=24634418). 2016. Electromagnetic fields promote osteogenesis of rat mesenchymal stem cells through the PKA and ERK1/2 pathways. *J. Tissue Eng. Regen. Med* 10:E537-E54.

[Zhang](https://pubmed.ncbi.nlm.nih.gov/?sort=date&term=Zhang+XJ&cauthor_id=31392878), X.J.,  [M.M. Lv](https://pubmed.ncbi.nlm.nih.gov/?sort=date&term=Lv+MM&cauthor_id=31392878), X.Q. [Zhu](https://pubmed.ncbi.nlm.nih.gov/?sort=date&term=Zhu+XQ&cauthor_id=31392878), L.Y. [Tian](https://pubmed.ncbi.nlm.nih.gov/?sort=date&term=Tian+LY&cauthor_id=31392878), J.J. [Li](https://pubmed.ncbi.nlm.nih.gov/?sort=date&term=Li+JJ&cauthor_id=31392878), Y.P. [Shao](https://pubmed.ncbi.nlm.nih.gov/?sort=date&term=Shao+YP&cauthor_id=31392878), C.J. [Gao](https://pubmed.ncbi.nlm.nih.gov/?sort=date&term=Gao+CJ&cauthor_id=31392878), and X.D. [Sun](https://pubmed.ncbi.nlm.nih.gov/?sort=date&term=Sun+XD&cauthor_id=31392878). 2019. Microglia M1/M2 polarization contributes to electromagnetic pulse-induced brain injury. *J. Biol. Regul. Homeost. Agents* 33:1051-62.

[Zuo](https://pubmed.ncbi.nlm.nih.gov/?sort=date&term=Zuo+H&cauthor_id=30588189), [H](https://pubmed.ncbi.nlm.nih.gov/30588189/#affiliation-1)., X. [Liu](https://pubmed.ncbi.nlm.nih.gov/?sort=date&term=Liu+X&cauthor_id=30588189),  [D. Wang](https://pubmed.ncbi.nlm.nih.gov/?sort=date&term=Wang+D&cauthor_id=30588189), Y. [Li](https://pubmed.ncbi.nlm.nih.gov/?sort=date&term=Li+Y&cauthor_id=30588189), X. [Xu](https://pubmed.ncbi.nlm.nih.gov/?sort=date&term=Xu+X&cauthor_id=30588189),  [R. Peng](https://pubmed.ncbi.nlm.nih.gov/?sort=date&term=Peng+R&cauthor_id=30588189), and T. [Song](https://pubmed.ncbi.nlm.nih.gov/?sort=date&term=Song+T&cauthor_id=30588189). 2018. RKIP-mediated NF-κB signaling is involved in ELF-MF-mediated improvement in AD rat. *Int. J. Med. Sci* 15:1658-66.
